# Supplementary material for: Transcriptomic analysis of de novo folate biosynthetic genes in Lactobacillus plantarum strain 4_3 in fermented soybean
Source: Royal Society of Chemistry journal article supplement (doi:10.1039/c8fo01952e), 2019-01-01

Supplementary Fig. 1

The expression levels of common DEGs among all samples and GO classification of significantly differentially expressed genes. A. Comparison among all samples, B: PC12h versus PC24h, C: PC24h versus PC36h, D: PC36h versus PC48h, E: FS24h versus FS36h, F: FS36h versus FS48h, G: FS48h versus FS60h, H: PC24h versus FS24h, I: PC36h versus FS36h, J: PC48h versus FS48h, and K: PC60h versus FS60h.

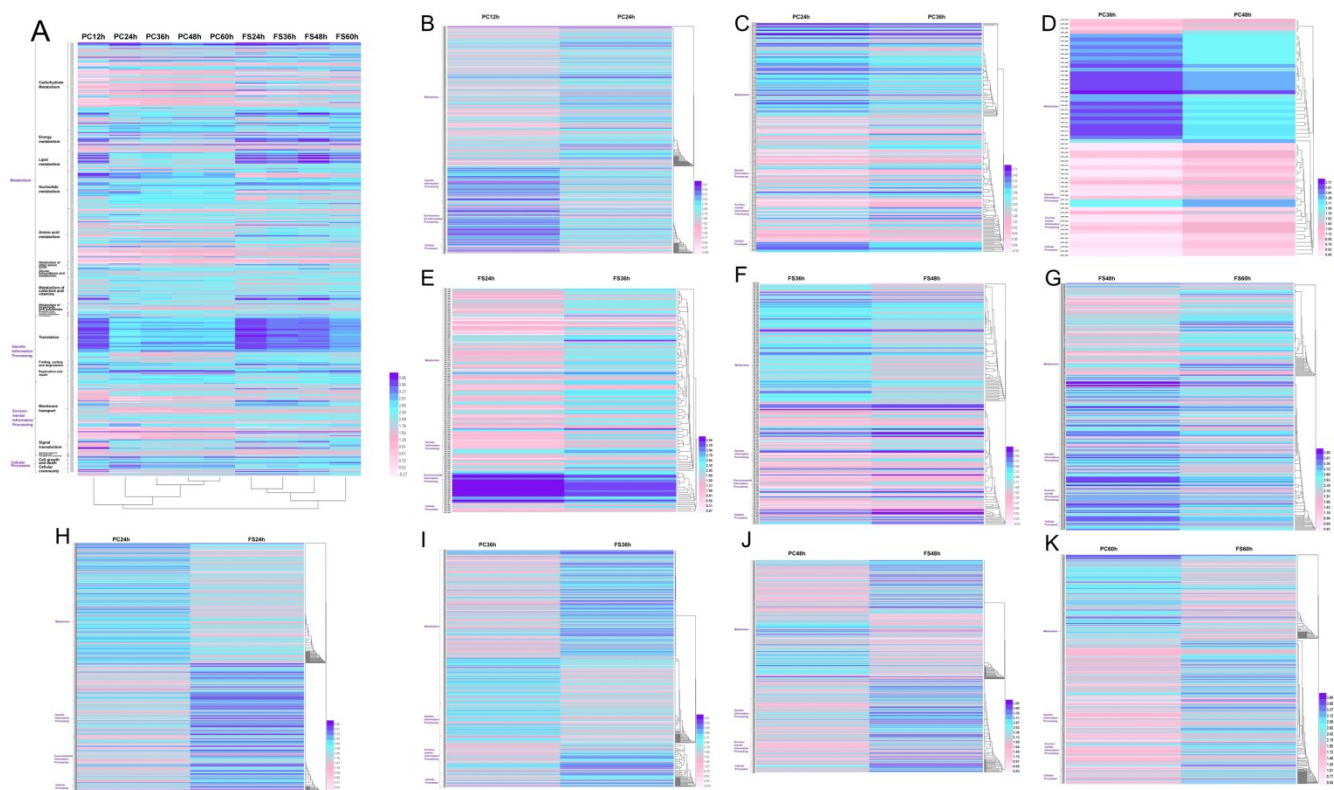

Supplement: c8fo01952e1.pdf [file c8fo01952e1.pdf]
