# Supplementary material for: Transcriptomic analysis of de novo folate biosynthetic genes in Lactobacillus plantarum strain 4_3 in fermented soybean
Source: Royal Society of Chemistry journal article supplement (doi:10.1039/c8fo01952e), 2019-01-01
Supplement: c8fo01952e2.xlsx [file c8fo01952e2.xlsx]

## Sheet: PC24h_PC12h
Gene	Product	Length
ORF_0001	transporter, major facilitator family protein	1392	up
ORF_0004	prophage Lp3 protein 24	207	up
ORF_0010	cell surface protein precursor	2355	up
ORF_0011	transcription regulator	441	up
ORF_0019	conserved hypothetical protein	717	up
ORF_0020	recombination regulator RecX	804	up
ORF_0023	transcription regulator	378	up
ORF_0024	conserved hypothetical protein	246	up
ORF_0039	conserved hypothetical protein	1026	up
ORF_0042	integral membrane protein	381	up
ORF_0050	integrase/recombinase, fragment (putative)	561	up
ORF_0051	ATP-dependent Clp protease ATP-binding subunit ClpC	2220	up
ORF_0061	sulfatase	2106	up
ORF_0070	Protein of hypothetical function DUF1706	510	up
ORF_0072	permease	1836	up
ORF_0077	signal peptidase I	588	up
ORF_0078	extracellular protein	1539	up
ORF_0079	cell surface protein precursor	342	up
ORF_0080	cell surface protein precursor	1026	up
ORF_0081	extracellular protein	738	up
ORF_0084	conserved hypothetical protein	969	up
ORF_0089	chromosomal replication initiation protein DnaA	1368	up
ORF_0106	1,4-alpha-glucan branching enzyme	1905	up
ORF_0107	glucose-1-phosphate adenylyltransferase	1140	up
ORF_0108	glucose-1-phosphate adenylyltransferase, subunit	1173	up
ORF_0109	starch (glycogen) synthase	1440	up
ORF_0110	glycogen phosphorylase	2397	up
ORF_0112	HAD superfamily hydrolase	768	up
ORF_0123	serine protease HtrA	1263	up
ORF_0124	SPOUT methyltransferase superfamily protein	480	up
ORF_0129	6-pyruvoyl tetrahydropterin synthase	369	up
ORF_0130	fibronectin-binding protein	648	up
ORF_0137	acetoacetate decarboxylase (putative)	846	up
ORF_0138	nitroreductase	654	up
ORF_0139	conserved hypothetical protein	1536	up
ORF_0156	ArsR family transcriptional regulator	324	up
ORF_0158	conserved hypothetical protein	156	up
ORF_0163	conserved hypothetical protein	1194	up
ORF_0164	conserved hypothetical protein	1338	up
ORF_0165	conserved hypothetical protein	300	up
ORF_0167	conserved hypothetical protein	279	up
ORF_0168	extracellular protein	573	up
ORF_0169	extracellular protein	693	up
ORF_0170	cell surface protein precursor	1014	up
ORF_0171	extracellular protein	2151	up
ORF_0176	D-serine/D-alanine/glycine:H+ symporter	1383	up
ORF_0178	low temperature requirement C protein (putative)	501	up
ORF_0180	transcription regulator	420	up
ORF_0181	negative regulator of proteolysis	405	up
ORF_0183	conserved hypothetical protein	324	up
ORF_0184	A/G-specific adenine glycosylase (putative)	1101	up
ORF_0185	conserved hypothetical protein	366	up
ORF_0187	small heat shock protein	444	up
ORF_0188	conserved hypothetical protein	339	up
ORF_0190	oxidoreductase (putative)	639	up
ORF_0191	acetyltransferase	459	up
ORF_0199	conserved hypothetical protein	273	up
ORF_0202	conserved hypothetical protein	183	up
ORF_0203	conserved hypothetical protein	294	up
ORF_0204	conserved hypothetical protein	387	up
ORF_0205	purine-cytosine transport protein	1374	up
ORF_0209	exopolysaccharide biosynthesis protein	771	up
ORF_0210	integral membrane protein	507	up
ORF_0212	ABC transporter, ATP-binding protein	1983	up
ORF_0213	redox-sensing transcriptional repressor Rex	678	up
ORF_0215	co-chaperonin GroES	285	up
ORF_0216	chaperonin GroEL	1626	up
ORF_0218	undecaprenyl-phosphate N-acetyl-glucosaminyl transferase	1098	up
ORF_0220	phosphate ABC transporter, substrate binding protein	903	up
ORF_0223	homoserine dehydrogenase	1287	up
ORF_0226	conserved hypothetical protein	435	up
ORF_0227	cation transporting P-type ATPase	2676	up
ORF_0230	teichoic acid biosynthesis protein A	738	up
ORF_0235	cation transport protein	1107	up
ORF_0236	conserved hypothetical protein	843	up
ORF_0237	conserved hypothetical protein	336	up
ORF_0238	conserved hypothetical protein	318	up
ORF_0241	putative frv operon regulatory protein	1113	up
ORF_0250	acetylesterase	792	up
ORF_0251	integral membrane protein (putative)	372	up
ORF_0254	conserved hypothetical protein	852	up
ORF_0255	short-chain dehydrogenase/oxidoreductase	840	up
ORF_0256	shikimate 5-dehydrogenase	885	up
ORF_0257	shikimate 5-dehydrogenase	885	up
ORF_0261	3-dehydroquinate dehydratase	759	up
ORF_0262	thiamin biosynthesis lipoprotein ApbE	957	up
ORF_0263	fumarate reductase, flavoprotein subunit precursor	2292	up
ORF_0264	FMN-binding protein	369	up
ORF_0276	XRE family transcriptional regulator	447	up
ORF_0277	cell filamentation protein Fic	600	up
ORF_0280	alpha-L-rhamnosidase (putative)	1578	up
ORF_0281	sugar transport protein	1281	up
ORF_0289	ferrichrome ABC transporter, substrate binding lipo protein	930	up
ORF_0293	TetR family transcriptional regulator	513	up
ORF_0294	oxidoreductase (putative)	894	up
ORF_0295	short-chain dehydrogenase/oxidoreductase	747	up
ORF_0296	conserved hypothetical protein	456	up
ORF_0297	short-chain dehydrogenase/oxidoreductase	837	up
ORF_0298	transcription regulator	381	up
ORF_0300	cell surface protein precursor	1062	up
ORF_0301	extracellular protein	546	up
ORF_0302	cell surface protein (putative)	2253	up
ORF_0304	transcription regulator	663	up
ORF_0305	GTP-binding protein LepA	1788	up
ORF_0307	Na(+)/H(+) antiporter	1602	up
ORF_0312	GY family cell surface protein	3570	up
ORF_0313	stress induced DNA binding protein	468	up
ORF_0314	conserved hypothetical protein	219	up
ORF_0320	transketolase	1992	up
ORF_0321	PTS family ascorbate porter, IIC component	1377	up
ORF_0326	conserved hypothetical protein	588	up
ORF_0330	conserved hypothetical protein	261	up
ORF_0356	putative uncharacterized protein	183	up
ORF_0357	putative uncharacterized protein	414	up
ORF_0358	hypothetical protein	681	up
ORF_0383	integral membrane protein	564	up
ORF_0384	transcriptional regulator	315	up
ORF_0385	integral membrane protein	681	up
ORF_0392	extracellular zinc metalloproteinase (putative)	801	up
ORF_0400	extracellular protein	783	up
ORF_0401	cell surface protein precursor	1044	up
ORF_0402	cell surface protein precursor (putative)	378	up
ORF_0403	extracellular protein	1509	up
ORF_0404	ABC superfamily ATP binding cassette transporter	966	up
ORF_0405	ABC transporter, permease protein	1002	up
ORF_0406	ABC transporter, ATP-binding protein	687	up
ORF_0407	N-acetylglucosamine PTS, EIICBA	1983	up
ORF_0412	transcription regulator (putative)	303	up
ORF_0414	metal-dependent hydrolase	924	up
ORF_0418	conserved hypothetical protein	1410	up
ORF_0420	esterase (putative)	741	up
ORF_0421	conserved hypothetical protein	258	up
ORF_0422	hydrolase	150	up
ORF_0425	3-octaprenyl-4-hydroxybenzoate carboxy-lyase	1473	up
ORF_0428	melibiose operon regulatory protein	162	up
ORF_0429	cell surface protein precursor	1260	up
ORF_0430	conserved hypothetical protein	195	up
ORF_0431	transcription regulator	1005	up
ORF_0435	anaerobic ribonucleoside-triphosphate reductase large subunit	2262	up
ORF_0437	diguanylate cyclase/phosphodiesterase domain-containing protein	681	up
ORF_0438	diguanylate cyclase/phosphodiesterase domain-containing protein	1131	up
ORF_0439	PTS, EIIA	534	up
ORF_0440	conserved hypothetical protein	243	up
ORF_0442	transcription regulator	720	up
ORF_0443	lipase/esterase (putative)	831	up
ORF_0444	type I phosphodiesterase/nucleotide pyrophosphatase	1296	up
ORF_0449	integral membrane protein	1926	up
ORF_0454	acetyltransferase (putative)	528	up
ORF_0461	ABC transporter, ATP-binding and permease protein	1752	up
ORF_0464	oxidoreductase	1029	up
ORF_0465	conserved hypothetical protein	867	up
ORF_0466	possible cystathionine beta-lyase	1191	up
ORF_0467	conserved hypothetical protein	594	up
ORF_0470	HAD superfamily hydrolase	684	up
ORF_0472	conserved hypothetical protein	444	up
ORF_0473	conserved hypothetical protein	222	up
ORF_0474	short chain dehydrogenase	852	up
ORF_0475	alcohol dehydrogenase	1041	up
ORF_0476	oxidoreductase (putative)	597	up
ORF_0477	transcription regulator	879	up
ORF_0478	conserved hypothetical protein	372	up
ORF_0481	integral membrane protein	252	up
ORF_0482	GNAT family acetyltransferase	498	up
ORF_0483	integral membrane protein	468	up
ORF_0484	signal peptidase I	624	up
ORF_0485	signal peptidase I	618	up
ORF_0487	DNA-(apurinic or apyrimidinic site) lyase	651	up
ORF_0492	transcription regulator	435	up
ORF_0493	conserved hypothetical protein	399	up
ORF_0494	carboxymuconolactone decarboxylase	321	up
ORF_0495	short-chain dehydrogenase/oxidoreductase	744	up
ORF_0506	transcription regulator (putative)	363	up
ORF_0507	HAD superfamily hydrolase	654	up
ORF_0508	extracellular protein (putative)	825	up
ORF_0509	cell surface protein	2790	up
ORF_0510	cell surface protein precursor	372	up
ORF_0511	extracellular protein	609	up
ORF_0512	cell surface protein precursor	1044	up
ORF_0515	oxidoreductase	969	up
ORF_0516	extracellular protein	705	up
ORF_0517	cell surface protein precursor	1065	up
ORF_0518	cell surface protein precursor	426	up
ORF_0519	extracellular protein	1395	up
ORF_0520	sensor histidine protein kinase	1329	up
ORF_0521	conserved hypothetical protein	255	up
ORF_0522	4-hydroxybenzoyl-CoA thioesterase domain protein	135	up
ORF_0523	transcription regulator	762	up
ORF_0528	aryl-alcohol dehydrogenase	1122	up
ORF_0531	amino acid transport protein	1485	up
ORF_0535	short chain dehydrogenase/reductase family oxidoreductase	891	up
ORF_0537	extracellular zinc metalloproteinase	1128	up
ORF_0538	ABC transporter, ATP-binding and permease protein	1725	up
ORF_0539	ABC transporter, ATP-binding protein	1782	up
ORF_0540	ABC transporter, permease protein (putative)	1191	up
ORF_0541	oxidoreductase (putative)	657	up
ORF_0550	transcription regulator	912	up
ORF_0561	transcription regulator	444	up
ORF_0562	dehydrogenase	1059	up
ORF_0566	cellobiose PTS, EIIA	447	up
ORF_0569	conserved hypothetical protein	315	up
ORF_0571	integral membrane protein	363	up
ORF_0572	cell surface protein precursor (putative)	3225	up
ORF_0573	ABC transporter, ATP-binding and permease protein	2001	up
ORF_0574	rep protein	954	up
ORF_0575	conserved hypothetical protein	219	up
ORF_0584	alpha-ribazole-5'-phosphate phosphatase	669	up
ORF_0588	conserved hypothetical protein	1002	up
ORF_0589	integral membrane protein	765	up
ORF_0590	transcription regulator	327	up
ORF_0599	acyl carrier protein phosphodiesterase	630	up
ORF_0601	hypothetical protein	117	up
ORF_0602	fumarate reductase, flavoprotein subunit precursor	1866	up
ORF_0603	transcription regulator	927	up
ORF_0613	hypothetical protein	132	up
ORF_0614	conserved hypothetical protein	573	up
ORF_0615	conserved hypothetical protein	333	up
ORF_0626	cell surface protein	2505	up
ORF_0627	MFS family major facilitator transporter	1110	up
ORF_0628	transcriptional regulator	345	up
ORF_0630	transcription regulator	369	up
ORF_0631	integral membrane protein	369	up
ORF_0632	hypothetical protein	117	up
ORF_0643	pantothenate kinase	930	up
ORF_0644	enoyl-	930	up
ORF_0645	DNA helicase (putative)	2307	up
ORF_0646	DedA family protein	648	up
ORF_0647	7,8-dihydro-8-oxoguanine-triphosphatase (putative)	954	up
ORF_0648	Na(+)/H(+) antiporter	1857	up
ORF_0651	GroEL supressor protein SugE	315	up
ORF_0655	transport protein	558	up
ORF_0656	multidrug transporter	1155	up
ORF_0657	transcription regulator	453	up
ORF_0658	integral membrane protein	879	up
ORF_0662	conserved hypothetical protein	759	up
ORF_0663	beta-glucosides PTS, EIIBC	1452	up
ORF_0671	conserved hypothetical protein	252	up
ORF_0674	phosphoglycolate phosphatase (putative)	627	up
ORF_0675	conserved hypothetical protein	819	up
ORF_0676	extracellular protein	510	up
ORF_0679	conserved hypothetical protein	150	up
ORF_0680	NUDIX family hydrolase	420	up
ORF_0681	pyridoxal kinase	819	up
ORF_0685	probable organic hydroperoxide resistance protein	405	up
ORF_0687	acyltransferase (putative)	1983	up
ORF_0688	biotin--	1005	up
ORF_0690	putative pyruvate oxidase	1761	up
ORF_0691	bifunctional protein: riboflavin kinase; FMN adenylyltransferase	849	up
ORF_0692	pyruvate oxidase	1740	up
ORF_0695	transcription regulator	486	up
ORF_0701	integral membrane protein	462	up
ORF_0703	negative regulator of proteolysis	423	up
ORF_0704	conserved hypothetical protein	783	up
ORF_0709	conserved hypothetical protein	435	up
ORF_0710	extracellular protein, peptide binding protein OppA-like protein	1644	up
ORF_0726	hydroxyethylthiazole kinase	792	up
ORF_0727	phosphomethylpyrimidine kinase	825	up
ORF_0728	thiamine-phosphate diphosphorylase	654	up
ORF_0729	purine-cytosine transport protein	1200	up
ORF_0730	conserved hypothetical protein	741	up
ORF_0734	conserved hypothetical protein	708	up
ORF_0735	halo peroxidase	783	up
ORF_0738	stress-responsive transcription regulator (putative)	195	up
ORF_0740	transcription regulator (putative)	474	up
ORF_0741	small heat shock protein	423	up
ORF_0742	integral membrane protein	171	up
ORF_0743	integral membrane protein	201	up
ORF_0744	conserved hypothetical protein	444	up
ORF_0748	oxidoreductase	849	up
ORF_0749	oxidoreductase	873	up
ORF_0750	conserved hypothetical protein	456	up
ORF_0751	conserved hypothetical protein	1695	up
ORF_0752	extracellular protein	813	up
ORF_0754	oxidoreductase	1110	up
ORF_0764	short-chain dehydrogenase/oxidoreductase	795	up
ORF_0770	transcription regulator (putative)	519	up
ORF_0771	glycerone kinase	990	up
ORF_0789	sucrose PTS, EIIBCA	1956	up
ORF_0796	transcription regulator	915	up
ORF_0797	conserved hypothetical protein	474	up
ORF_0798	P-type cation-transporting ATPase	2613	up
ORF_0801	2,5-diketo-D-gluconate reductase	861	up
ORF_0809	extracellular protein	969	up
ORF_0818	glutamate decarboxylase	1410	up
ORF_0820	conserved hypothetical protein	336	up
ORF_0822	conserved hypothetical protein	594	up
ORF_0823	conserved hypothetical protein	312	up
ORF_0831	ABC superfamily ATP binding cassette transporter, ABC protein	783	up
ORF_0832	ABC transporter, permease protein (putative)	909	up
ORF_0833	ABC superfamily ATP binding cassette transporter, binding protein	1008	up
ORF_0840	PTS family N-acetylglucosamine porter, IIABC component	1989	up
ORF_0841	conserved hypothetical protein	342	up
ORF_0847	conserved hypothetical protein	222	up
ORF_0849	cell wall-associated hydrolase	894	up
ORF_0850	cell surface hydrolase (putative)	864	up
ORF_0851	hypothetical protein	147	up
ORF_0854	transport protein	1188	up
ORF_0855	conserved hypothetical protein	318	up
ORF_0865	conserved hypothetical protein	192	up
ORF_0866	ABC transporter, ATP-binding and permease protein	399	up
ORF_0867	ABC transporter, ATP-binding and permease protein	1605	up
ORF_0868	poly(glycerol-phosphate) alpha-glucosyltransferase	1578	up
ORF_0869	ABC transporter, ATP-binding and permease protein	1764	up
ORF_0870	conserved hypothetical protein	132	up
ORF_0871	conserved hypothetical protein	144	up
ORF_0872	hypothetical protein	168	up
ORF_0873	conserved hypothetical protein	510	up
ORF_0874	mobilization protein	1086	up
ORF_0875	replication protein 141	711	up
ORF_0883	cell surface protein precursor	1713	up
ORF_0884	cell surface protein precursor	1674	up
ORF_0885	transposase	690	up
ORF_0891	HD domain protein	198	up
ORF_0892	S-adenosyl-L-homocysteine hydrolase, NAD binding domain protein	1155	up
ORF_0913	thioredoxin reductase (NADPH)	939	up
ORF_0920	D-alanyl-D-alanine dipeptidase	558	up
ORF_0921	multidrug transport protein	1197	up
ORF_0923	excinuclease ABC subunit B	2004	up
ORF_0932	lipoprotein precursor, peptide binding protein OppA-like protein	1653	up
ORF_0934	ATP-dependent Clp protease proteolytic subunit	591	up
ORF_0935	RNA polymerase factor sigma-54	1338	up
ORF_0937	glyceraldehyde-3-phosphate dehydrogenase	1023	up
ORF_0938	phosphoglycerate kinase	1203	up
ORF_0939	triosephosphate isomerase	759	up
ORF_0947	cell surface protein	7947	up
ORF_0948	glutamine ABC superfamily ATP binding cassette transporter, substrate binding and permease protein	1437	up
ORF_0949	glutamine ABC transporter, ATP-binding protein	735	up
ORF_0951	HAD superfamily hydrolase	870	up
ORF_0953	phosphotransacetylase	978	up
ORF_0954	ATP/GTP hydrolase	462	up
ORF_0955	acetyltransferase (putative)	516	up
ORF_0956	DNA-directed DNA polymerase III epsilon subunit	537	up
ORF_0957	exodeoxyribonuclease III	798	up
ORF_0958	oxidoreductase (putative)	903	up
ORF_0971	aldose 1-epimerase	1020	up
ORF_0973	conserved hypothetical protein	426	up
ORF_0974	nitro/flavin reductase	753	up
ORF_0977	conserved hypothetical protein	381	up
ORF_0978	RNA binding protein	402	up
ORF_0988	acetate kinase	1194	up
ORF_0989	adenine-specific methyltransferase	1095	up
ORF_0993	conserved hypothetical protein	471	up
ORF_0995	ComG operon protein 2	969	up
ORF_0997	ribokinase	921	up
ORF_1005	conserved hypothetical protein	513	up
ORF_1006	conserved hypothetical protein	417	up
ORF_1007	mechanosensitive transport protein	894	up
ORF_1010	conserved hypothetical protein	492	up
ORF_1015	thioredoxin	312	up
ORF_1017	conserved hypothetical protein	258	up
ORF_1018	conserved hypothetical protein	297	up
ORF_1019	Holliday junction resolvase-like protein	435	up
ORF_1020	conserved hypothetical protein	270	up
ORF_1024	DNA-directed DNA polymerase IV	1134	up
ORF_1033	conserved hypothetical protein	399	up
ORF_1039	negative regulator of proteolysis	381	up
ORF_1045	oxidoreductase	1206	up
ORF_1046	N-acetylmannosamine-6-phosphate 2-epimerase	687	up
ORF_1048	sugar kinase and transcription regulator	864	up
ORF_1050	Na(+)/H(+) antiporter	1197	up
ORF_1052	lipase/esterase (putative)	837	up
ORF_1053	lipase/esterase (putative)	837	up
ORF_1054	conserved hypothetical protein	408	up
ORF_1055	transcription regulator	822	up
ORF_1057	arabinose transport protein	1401	up
ORF_1058	L-ribulokinase (putative)	1602	up
ORF_1059	L-ribulose-5-phosphate 4-epimerase	729	up
ORF_1060	L-arabinose isomerase	1425	up
ORF_1061	maltose O-acetyltransferase	561	up
ORF_1062	conserved hypothetical protein	399	up
ORF_1068	L-iditol 2-dehydrogenase	1110	up
ORF_1070	PTS system, enzyme IIA component	432	up
ORF_1071	FruA	462	up
ORF_1072	PTS system, fructose-specific, IIB component	318	up
ORF_1073	PTS system IIC component	1107	up
ORF_1074	ribulose-phosphate 3-epimerase	693	up
ORF_1075	transaldolase	654	up
ORF_1076	transketolase	1998	up
ORF_1077	HAD superfamily hydrolase	819	up
ORF_1078	choloylglycine hydrolase	975	up
ORF_1082	maltose phosphorylase	2205	up
ORF_1090	transcription regulator	849	up
ORF_1091	glucose PTS, EIIA	483	up
ORF_1092	putative fructose-like phosphotransferase system subunit EIIA	444	up
ORF_1093	putative PTS transporter components IIBC	1458	up
ORF_1094	cystathionine beta-lyase	1164	up
ORF_1096	esterase (putative)	990	up
ORF_1099	conserved hypothetical protein	312	up
ORF_1102	conserved hypothetical protein	246	up
ORF_1104	conserved hypothetical protein	642	up
ORF_1105	ABC transporter, ATP-binding protein	423	up
ORF_1114	integral membrane protein	366	up
ORF_1116	GNAT family acetyltransferase	444	up
ORF_1117	transcription regulator	423	up
ORF_1120	conserved hypothetical protein	411	up
ORF_1121	conserved hypothetical protein	429	up
ORF_1128	acetyltransferase (putative)	486	up
ORF_1129	acetyltransferase (putative)	528	up
ORF_1130	conserved hypothetical protein	186	up
ORF_1134	acetaldehyde dehydrogenase	1368	up
ORF_1141	conserved hypothetical protein	246	up
ORF_1142	integral membrane protein	564	up
ORF_1143	biotin-(acetyl-CoA-carboxylase)ligase and biotin operon repressor	972	up
ORF_1144	conserved hypothetical protein	123	up
ORF_1145	penicillin-binding protein 2	1152	up
ORF_1146	conserved hypothetical protein	1167	up
ORF_1147	teichoic acid ABC transporter, permease protein	816	up
ORF_1148	teichoic acid ABC transporter, ATP-binding protein	1092	up
ORF_1149	integral membrane protein	273	up
ORF_1150	transcription regulator	543	up
ORF_1151	transport protein	1446	up
ORF_1152	AMT family ammonium or ammonia transporter	1263	up
ORF_1155	extracellular zinc metalloproteinase	564	up
ORF_1156	ribose 5-phosphate epimerase	669	up
ORF_1162	conserved hypothetical protein	456	up
ORF_1163	acetyl-CoA carboxylase, biotin carboxyl carrier protein	573	up
ORF_1165	short chain dehydrogenase/reductase family oxidoreductase	912	up
ORF_1173	poly(glycerol-phosphate) alpha-glucosyltransferase	1509	up
ORF_1174	poly(glycerol-phosphate) alpha-glucosyltransferase	1545	up
ORF_1194	metallo-beta-lactamase	744	up
ORF_1196	adaptor protein	732	up
ORF_1199	conserved hypothetical protein	636	up
ORF_1200	GTP pyrophosphokinase (putative)	663	up
ORF_1205	glucitol/sorbitol PTS, EIIA	360	up
ORF_1211	conserved hypothetical protein	648	up
ORF_1216	integral membrane protein	369	up
ORF_1233	putative ABC transporter, integral membrane protein	867	up
ORF_1234	LytTr family transcriptional regulator	459	up
ORF_1235	conserved hypothetical protein	405	up
ORF_1236	hypothetical protein	114	up
ORF_1237	diaminopimelate epimerase	999	up
ORF_1238	NUDIX family hydrolase	555	up
ORF_1239	conserved hypothetical protein	252	up
ORF_1240	methylthioadenosine nucleosidase; S-adenosylhomocysteine nucleosidase	693	up
ORF_1241	cysteine desulfurase	1161	up
ORF_1242	conserved hypothetical protein	342	up
ORF_1271	conserved hypothetical protein	522	up
ORF_1278	glycosyltransferase	1500	up
ORF_1279	integral membrane protein	720	up
ORF_1282	hypothetical protein	114	up
ORF_1283	hypothetical protein	1287	up
ORF_1284	hypothetical protein	405	up
ORF_1285	conserved hypothetical protein	888	up
ORF_1286	conserved hypothetical protein	675	up
ORF_1287	poly(glycerol-phosphate) alpha-glucosyltransferase	1509	up
ORF_1290	methyltransferase (putative)	528	up
ORF_1296	dipeptidase PepV	1404	up
ORF_1297	possible universal stress protein	507	up
ORF_1303	deoxyguanosine kinase	648	up
ORF_1304	large-conductance mechanosensitive channel	381	up
ORF_1310	conserved hypothetical protein	216	up
ORF_1311	protein-methionine-S-oxide reductase	804	up
ORF_1312	conserved hypothetical protein	117	up
ORF_1313	transcription regulator	393	up
ORF_1314	conserved hypothetical protein	642	up
ORF_1315	transport protein	939	up
ORF_1318	histidine protein kinase; sensor protein	1263	up
ORF_1319	response regulator	768	up
ORF_1321	integral membrane protein	372	up
ORF_1322	CAAX family protease	687	up
ORF_1323	transcription regulator	477	up
ORF_1324	conserved hypothetical protein	513	up
ORF_1334	conserved hypothetical protein	1638	up
ORF_1335	sulfate adenylyltransferase	1176	up
ORF_1336	adenylylsulfate kinase	624	up
ORF_1337	exopolyphosphatase-related protein (putative)	957	up
ORF_1338	hypothetical protein	120	up
ORF_1339	arylsulfate sulfotransferase	1740	up
ORF_1341	sodium/sulfate symport protein (putative)	1776	up
ORF_1342	cation efflux protein (putative)	1392	up
ORF_1343	conserved hypothetical protein	246	up
ORF_1344	GNAT family acetyltransferase	447	up
ORF_1346	conserved hypothetical protein	477	up
ORF_1347	hypothetical protein	114	up
ORF_1348	ABC transporter, ATP-binding and permease protein	1995	up
ORF_1349	conserved hypothetical protein	657	up
ORF_1350	transcription regulator levR	2556	up
ORF_1351	conserved hypothetical protein	450	up
ORF_1359	D-alanine--poly(phosphoribitol) ligase subunit 2	237	up
ORF_1362	transaminase	1122	up
ORF_1364	conserved hypothetical protein	123	up
ORF_1365	penicillin binding protein 2A	2130	up
ORF_1371	nisin resistance protein (putative)	870	up
ORF_1372	transcription regulator	948	up
ORF_1373	conserved hypothetical protein	162	up
ORF_1374	oxidoreductase (putative)	615	up
ORF_1375	fumarate reductase, flavoprotein subunit precursor	2439	up
ORF_1379	response regulator	693	up
ORF_1383	DedA protein (DSG-1 protein)	636	up
ORF_1384	glycosyltransferase	996	up
ORF_1385	integral membrane protein	2037	up
ORF_1386	MutT/NudX family protein (putative)	414	up
ORF_1387	integral membrane protein	2550	up
ORF_1393	conserved hypothetical protein	564	up
ORF_1394	transcription regulator	642	up
ORF_1396	NADH peroxidase	1317	up
ORF_1408	conserved hypothetical protein	786	up
ORF_1409	tRNA (guanine-N(7)-)-methyltransferase	699	up
ORF_1410	conserved hypothetical protein	324	up
ORF_1411	tRNA-binding domain protein	642	up
ORF_1424	integral membrane protein	717	up
ORF_1438	transcription regulator (putative)	348	up
ORF_1439	aspartate racemase	747	up
ORF_1445	nicotinate-nucleotide adenylyltransferase	636	up
ORF_1446	conserved hypothetical protein	618	up
ORF_1448	methyltransferase (putative)	735	up
ORF_1453	cation transport protein	963	up
ORF_1454	6-phosphogluconate dehydrogenase	1437	up
ORF_1467	conserved hypothetical protein	282	up
ORF_1468	conserved hypothetical protein	213	up
ORF_1469	nicking enzyme (TraA)-like	2064	up
ORF_1485	conserved hypothetical protein	348	up
ORF_1486	conserved hypothetical protein	264	up
ORF_1500	glucosamine-6-phosphate isomerase	714	up
ORF_1503	transcription regulator	2076	up
ORF_1504	mannitol PTS, EIIA	450	up
ORF_1505	mannitol-1-phosphate 5-dehydrogenase	1158	up
ORF_1507	thioredoxin	333	up
ORF_1508	conserved hypothetical protein	555	up
ORF_1509	conserved hypothetical protein	324	up
ORF_1510	nucleoside-diphosphate kinase	465	up
ORF_1511	conserved hypothetical protein	1347	up
ORF_1512	NADPH-dependent FMN reductase	672	up
ORF_1513	transcription regulator	696	up
ORF_1521	serine O-acetyltransferase	543	up
ORF_1522	cystathionine beta-lyase	1146	up
ORF_1523	cysteine synthase	912	up
ORF_1525	integral membrane protein	690	up
ORF_1526	conserved hypothetical protein	279	up
ORF_1527	integral membrane protein	288	up
ORF_1532	conserved hypothetical protein	783	up
ORF_1536	transcription regulator	690	up
ORF_1537	manganese transport protein	1395	up
ORF_1539	extracellular protein	306	up
ORF_1540	conserved hypothetical protein	252	up
ORF_1542	transcription regulator	393	up
ORF_1545	conserved hypothetical protein	297	up
ORF_1546	transcription regulator	732	up
ORF_1548	conserved hypothetical protein	312	up
ORF_1549	conserved hypothetical protein	255	up
ORF_1551	oxidoreductase	1395	up
ORF_1552	conserved hypothetical protein	288	up
ORF_1553	GTP pyrophosphokinase (putative)	693	up
ORF_1558	ABC superfamily ATP binding cassette transporter, membrane protein	1479	up
ORF_1566	conserved hypothetical protein	303	up
ORF_1567	probable methyltransferase	564	up
ORF_1568	pantetheine-phosphate adenylyltransferase	492	up
ORF_1569	endopeptidase La (putative)	1047	up
ORF_1570	ComE operon protein 1	726	up
ORF_1571	dCMP deaminase	489	up
ORF_1582	ATP-dependent protease ATP-binding subunit	1266	up
ORF_1585	conserved hypothetical protein	408	up
ORF_1586	conserved hypothetical protein	171	up
ORF_1589	excinuclease ABC subunit C	1752	up
ORF_1590	exopolysaccharide biosynthesis protein	759	up
ORF_1591	capsular exopolysaccharide family protein	681	up
ORF_1592	exopolysaccharide biosynthesis protein	795	up
ORF_1593	UDP-glucose 4-epimerase	939	up
ORF_1594	priming glycosyltransferase	672	up
ORF_1595	glycosyltransferase	717	up
ORF_1596	polysaccharide polymerase	1275	up
ORF_1597	glycosyltransferase	969	up
ORF_1598	repeat unit transporter	1452	up
ORF_1600	fructose PTS, EIIABC	1968	up
ORF_1601	1-phosphofructokinase	918	up
ORF_1602	transcription regulator of fructose operon	756	up
ORF_1604	conserved hypothetical protein	285	up
ORF_1611	conserved hypothetical protein	585	up
ORF_1615	conserved hypothetical protein	207	up
ORF_1622	transport protein	678	up
ORF_1623	transcription regulator of multidrug-efflux transporter	816	up
ORF_1625	integral membrane protein	504	up
ORF_1634	aspartate ammonia-lyase	1401	up
ORF_1636	hypothetical protein	132	up
ORF_1644	Aryl-alcohol dehydrogenase family enzyme	993	up
ORF_1648	exopolysaccharide biosynthesis protein; chain length determinator Wzz	579	up
ORF_1649	exopolysaccharide biosynthesis protein	774	up
ORF_1650	UDP-glucose 4-epimerase	948	up
ORF_1651	priming glycosyltransferase	678	up
ORF_1652	glycosyl transferase group 2	765	up
ORF_1653	glycosyltransferase	1023	up
ORF_1654	conserved hypothetical protein	1206	up
ORF_1655	lipopolysaccharide 1,6-galactosyltransferase	1032	up
ORF_1656	capsular polysaccharide phosphotransferase	984	up
ORF_1660	glycosyltransferase	909	up
ORF_1661	glycosyltransferase	933	up
ORF_1669	conserved hypothetical protein	747	up
ORF_1677	CDP-diacylglycerol--glycerol-3-phosphate 3-phosphatidyltransferase	585	up
ORF_1694	thiol peroxidase	495	up
ORF_1696	thiamine biosynthesis protein ThiI	1218	up
ORF_1697	cysteine desulfurase	1155	up
ORF_1700	signal protein	462	up
ORF_1703	conserved hypothetical protein	465	up
ORF_1709	universal stress protein	486	up
ORF_1716	L-2-hydroxyisocaproate dehydrogenase	918	up
ORF_1735	uracil transport protein	1281	up
ORF_1741	peptide chain release factor 1	1083	up
ORF_1742	thymidine kinase	588	up
ORF_1743	UDP-N-acetylmuramyl tripeptide synthase (putative)	1347	up
ORF_1744	cobyric acid synthase (putative)	723	up
ORF_1747	conserved hypothetical protein	186	up
ORF_1750	lipoprotein	972	up
ORF_1751	ABC transporter, ATP-binding and permease protein	1890	up
ORF_1752	multidrug resistance ABC superfamily ATP binding cassette transporter, ABC/membrane protein	1731	up
ORF_1758	conserved hypothetical protein	123	up
ORF_1759	conserved hypothetical protein	450	up
ORF_1765	prophage major tail protein	471	up
ORF_1766	prophage protein	366	up
ORF_1771	prophage major head protein	1023	up
ORF_1772	prophage protein	348	up
ORF_1773	possible scaffold protein	678	up
ORF_1775	conserved hypothetical protein	201	up
ORF_1776	prophage minor head protein	1686	up
ORF_1778	SPP1 family phage portal protein	1509	up
ORF_1779	PBSX family phage terminase	1239	up
ORF_1780	prophage Lp2 protein 34	528	up
ORF_1782	hypothetical protein	198	up
ORF_1783	prophage Lp1 protein 33	462	up
ORF_1784	prophage Lp2 protein 23	519	up
ORF_1785	prophage Lp2 protein 21	288	up
ORF_1786	DnaD domain protein	933	up
ORF_1787	conserved hypothetical protein	966	up
ORF_1788	phage protein	531	up
ORF_1789	hypothetical protein	114	up
ORF_1790	prophage Lp2 protein 13	258	up
ORF_1791	prophage Lp2 protein 12	306	up
ORF_1792	putative uncharacterized protein	135	up
ORF_1793	prophage Lp1 protein 12	201	up
ORF_1807	putative LtrC	1125	up
ORF_1808	putative uncharacterized protein	216	up
ORF_1809	DNA topoisomerase	372	up
ORF_1810	DNA integration/recombination/inversion protein	633	up
ORF_1811	YitT family protein	903	up
ORF_1812	hypothetical protein	204	up
ORF_1813	copy number control protein	801	up
ORF_1815	Replication initiator protein	138	up
ORF_1816	DNA-damage-inducible protein	282	up
ORF_1817	conserved hypothetical protein	507	up
ORF_1820	nickase	2061	up
ORF_1823	lactate oxidase	1101	up
ORF_1824	pyruvate oxidase	1749	up
ORF_1825	transcription regulator (putative)	426	up
ORF_1828	sugar specific permease (putative)	690	up
ORF_1829	Rhamnulose-1-phosphate aldolase	852	up
ORF_1830	L-rhamnose isomerase	1284	up
ORF_1831	conserved hypothetical protein	315	up
ORF_1838	galactitol PTS, EIIC	1542	up
ORF_1840	Phosphotransferase system IIA component	489	up
ORF_1841	hypothetical protein	372	up
ORF_1842	conserved hypothetical protein	582	up
ORF_1843	transcription regulator	777	up
ORF_1844	N-acetylglucosamine and glucose PTS, EIICBA	1908	up
ORF_1845	mannose-6-phosphate isomerase	1332	up
ORF_1846	beta-phosphoglucomutase	681	up
ORF_1847	conserved hypothetical protein	498	up
ORF_1848	N-acetylglucosamine and glucose PTS, EIICBA	1869	up
ORF_1853	xylose repressor	1164	up
ORF_1854	xylose repressor	1167	up
ORF_1856	fructose-6-phosphate aldolase	171	up
ORF_1859	alpha-glucosidase	1677	up
ORF_1860	beta-glucosidase	1386	up
ORF_1861	ROK family protein	879	up
ORF_1862	alpha-mannosidase (putative)	2700	up
ORF_1863	conserved hypothetical protein	1290	up
ORF_1866	multiple sugar ABC transporter, ATP-binding protein	1137	up
ORF_1867	fructokinase	864	up
ORF_1868	response regulator	1473	up
ORF_1869	histidine protein kinase; sensor protein	1713	up
ORF_1870	integral membrane protein	612	up
ORF_1876	putative uncharacterized protein lp_3645	1851	up
ORF_1880	transcription regulator	1050	up
ORF_1881	regulator	846	up
ORF_1883	PTS system, IIC component	1239	up
ORF_1884	cellobiose-specific PTS system IIB component	312	up
ORF_1885	membrane-associated phospholipid phosphatase	948	up
ORF_1887	putative ribose uptake protein rbsU	885	up
ORF_1890	ribose operon repressor	999	up
ORF_1893	RecName: Full=Xylose repressor >gi|149605|gb|AAA25257.1| repressor protein	1167	up
ORF_1894	alpha-glucosidase, family 31 of glycosyl hydrolase	2289	up
ORF_1896	bifunctional acetaldehyde-CoA/alcohol dehydrogenase	2604	up
ORF_1908	O-sialoglycoprotein endopeptidase	1038	up
ORF_1909	ribosomal-protein-alanine N-acetyltransferase	456	up
ORF_1910	ribosomal-protein-alanine N-acetyltransferase	546	up
ORF_1924	thymidylate kinase	666	up
ORF_1925	conserved hypothetical protein	252	up
ORF_1926	recombination protein RecR	600	up
ORF_1927	conserved hypothetical protein	297	up
ORF_1928	DNA-directed DNA polymerase III, gamma/tau subunit	1698	up
ORF_1931	glutaredoxin-like protein NrdH	231	up
ORF_1932	ribonucleotide-diphosphate reductase subunit alpha	2166	up
ORF_1942	possible alpha/beta hydrolase	888	up
ORF_1943	transcription antitermination protein NusG	549	up
ORF_1944	preprotein translocase subunit SecE	186	up
ORF_1945	50S ribosomal protein L33	150	up
ORF_1946	DNA-directed RNA polymerase, sigma factor 30	564	up
ORF_1947	conserved hypothetical protein	546	up
ORF_1948	tRNA/rRNA methyltransferase	768	up
ORF_1949	conserved hypothetical protein	411	up
ORF_1950	cysteine-tRNA ligase	1413	up
ORF_1954	conserved hypothetical protein	120	up
ORF_1955	trimetaphosphatase	537	up
ORF_1956	acetyltransferase (putative)	297	up
ORF_1957	ribose-5-phosphate isomerase A	684	up
ORF_1959	extracellular zinc metalloproteinase	627	up
ORF_1964	acetyl-CoA carboxylase, carboxyl transferase subunit alpha	774	up
ORF_1965	acetyl-CoA carboxylase, carboxyl transferase subunit beta	804	up
ORF_1966	acetyl-CoA carboxylase, biotin carboxylase subunit	1323	up
ORF_1967	acetyl-CoA carboxylase, biotin carboxyl carrier protein	402	up
ORF_1968	3-oxoacyl-(acyl carrier protein) synthase III	972	up
ORF_1971	transcription regulator	2850	up
ORF_1976	conserved hypothetical protein	819	up
ORF_1980	dTDP-glucose 4,6-dehydratase	1029	up
ORF_1981	dTDP-4-dehydrorhamnose 3,5-epimerase	582	up
ORF_1982	glucose-1-phosphate thymidylyltransferase	870	up
ORF_1991	conserved hypothetical protein	564	up
ORF_1992	phosphoribosyl-ATP pyrophosphatase	132	up
ORF_1994	conserved hypothetical protein	201	up
ORF_1997	universal stress protein UspA family nucleotide-binding protein	441	up
ORF_1999	oxidoreductase (putative)	1008	up
ORF_2002	conserved hypothetical protein	366	up
ORF_2005	cell surface hydrolase (putative)	885	up
ORF_2006	cellobiose PTS, EIIC	1317	up
ORF_2007	E1-E2 family cation-transporting ATPase	2340	up
ORF_2016	ATP-dependent DNA helicase PcrA	2268	up
ORF_2020	mannosyl-glycoprotein endo-beta-N-acetylglucosamidase	642	up
ORF_2021	oxidoreductase (putative)	975	up
ORF_2028	cytochrome D ubiquinol oxidase, subunit II	996	up
ORF_2029	cytochrome D ubiquinol oxidase, subunit I	1440	up
ORF_2030	cell surface hydrolase	2706	up
ORF_2031	conserved hypothetical protein	177	up
ORF_2037	malolactic regulator (putative)	882	up
ORF_2038	apo-citrate lyase phosphoribosyl-ft dephospho-CoA transferase	537	up
ORF_2041	conserved hypothetical protein	123	up
ORF_2042	citrate (pro-3S)-lyase	1539	up
ORF_2043	citrate lyase, beta chain	915	up
ORF_2044	citrate lyase subunit gamma	291	up
ORF_2045	(citrate (pro-3S)-lyase) ligase	1056	up
ORF_2046	malic enzyme, NAD-dependent	1161	up
ORF_2048	cation transport protein	1419	up
ORF_2049	L-lactate dehydrogenase	930	up
ORF_2062	shikimate 5-dehydrogenase	894	up
ORF_2063	transketolase	2013	up
ORF_2069	tRNA-pseudouridine synthase I	837	up
ORF_2070	ABC transporter, permease protein	801	up
ORF_2071	cobalt transporter ATP-binding subunit	888	up
ORF_2072	cobalt transporter ATP-binding subunit	846	up
ORF_2113	transcription regulator (putative)	603	up
ORF_2118	deoxyguanosine kinase	636	up
ORF_2134	conserved hypothetical protein	465	up
ORF_2139	conserved hypothetical protein	504	up
ORF_2140	conserved hypothetical protein	717	up
ORF_2146	transcription regulator	1008	up
ORF_2147	heat shock protein HSP33	888	up
ORF_2152	conserved hypothetical protein	399	up
ORF_2156	peptidyl-tRNA hydrolase	558	up
ORF_2157	L-lactate dehydrogenase	963	up
ORF_2163	integral membrane protein	507	up
ORF_2164	ornithine carbamoyltransferase	1023	up
ORF_2165	acetylornithine aminotransferase	1170	up
ORF_2184	3-hydroxyisobutyrate dehydrogenase	858	up
ORF_2185	integral membrane protein	774	up
ORF_2187	histidinol-phosphate transaminase	1071	up
ORF_2188	phosphoribosyl-ATP pyrophosphatase	321	up
ORF_2189	phosphoribosyl-AMP cyclohydrolase/phosphoribosyl-ATP pyrophosphohydrolase	327	up
ORF_2190	imidazole glycerol phosphate synthase, cyclase subunit	759	up
ORF_2201	transcription regulator	510	up
ORF_2202	short-chain alcohol dehydrogenase/reductase	825	up
ORF_2206	conserved hypothetical protein	219	up
ORF_2207	integral membrane protein	777	up
ORF_2214	cell surface hydrolase, membrane-bound (putative)	762	up
ORF_2215	cell surface protein precursor	1665	up
ORF_2223	oxidoreductase	978	up
ORF_2224	conserved hypothetical protein	114	up
ORF_2225	oxidoreductase	1020	up
ORF_2228	1-deoxy-D-xylulose-5-phosphate synthase	1752	up
ORF_2229	pyrazinamidase/nicotinamidase	555	up
ORF_2238	conserved hypothetical protein	357	up
ORF_2239	acetyltransferase	285	up
ORF_2241	possible hydrolase	786	up
ORF_2242	thioredoxin H-type	321	up
ORF_2243	cystathionine gamma-synthase	1122	up
ORF_2252	universal stress protein	462	up
ORF_2257	transcription regulator	321	up
ORF_2274	major facilitator superfamily multidrug transporter	1164	up
ORF_2277	integral membrane protein	348	up
ORF_2278	glucose-6-phosphate 1-dehydrogenase	1485	up
ORF_2279	aminotransferase with N	1365	up
ORF_2282	conserved hypothetical protein	135	up
ORF_2283	permease	366	up
ORF_2284	permease	423	up
ORF_2286	conserved hypothetical protein	642	up
ORF_2292	orotidine-5'-phosphate decarboxylase	714	up
ORF_2293	dihydroorotate dehydrogenase 1B	918	up
ORF_2294	carbamoyl-phosphate synthase (glutamine-hydrolyzing), large subunit	3177	up
ORF_2295	carbamoyl-phosphate synthase (glutamine-hydrolyzing)	1095	up
ORF_2296	dihydroorotase	1293	up
ORF_2297	aspartate carbamoyltransferase catalytic subunit	936	up
ORF_2298	pyrimidine regulatory protein PyrR	543	up
ORF_2303	conserved hypothetical protein	903	up
ORF_2304	diguanylate cyclase/phosphodiesterase domain-containing protein	654	up
ORF_2305	diguanylate cyclase/phosphodiesterase domain-containing protein	129	up
ORF_2319	phosphoribosylaminoimidazole carboxylase, catalytic subunit	486	up
ORF_2326	L-asparaginase	975	up
ORF_2333	universal stress protein UspA	537	up
ORF_2334	Na+/H+ ion antiporter	237	up
ORF_2336	conserved hypothetical protein	474	up
ORF_2340	conserved hypothetical protein	639	up
ORF_2349	3-ketoacyl-(acyl-carrier-protein) reductase	747	up
ORF_2350	conserved hypothetical protein	222	up
ORF_2353	conserved hypothetical protein	510	up
ORF_2354	nicotinate phosphoribosyltransferase	1434	up
ORF_2355	transcription regulator (putative)	672	up
ORF_2358	D-serine ammonia-lyase	1311	up
ORF_2361	cellobiose PTS, EIIA	348	up
ORF_2364	glycosyltransferase	669	up
ORF_2365	phosphoglycerate mutase	675	up
ORF_2366	conserved hypothetical protein	489	up
ORF_2369	transport protein	927	up
ORF_2370	phosphoglycerate dehydrogenase	951	up
ORF_2371	oxidoreductase	573	up
ORF_2373	flavodoxin	447	up
ORF_2374	cell surface protein precursor	3120	up
ORF_2375	cell surface protein precursor	2937	up
ORF_2378	amino acid transport protein	1437	up
ORF_2379	transcription regulator (putative)	456	up
ORF_2380	oxidoreductase	867	up
ORF_2381	organophosphate reductase	864	up
ORF_2382	transcription regulator	900	up
ORF_2389	sortase	705	up
ORF_2402	DNA-directed RNA polymerase subunit delta	609	up
ORF_2403	conserved hypothetical protein	441	up
ORF_2409	lipoprotein precursor (putative)	987	up
ORF_2410	integral membrane protein	1023	up
ORF_2411	ribose-phosphate pyrophosphokinase	981	up
ORF_2412	beta-lactamase	825	up
ORF_2414	purine operon repressor	837	up
ORF_2420	cell surface hydrolase, membrane-bound (putative)	945	up
ORF_2421	conserved hypothetical protein	138	up
ORF_2422	4-diphosphocytidyl-2-C-methyl-D-erythritol kinase	867	up
ORF_2430	conserved hypothetical protein	390	up
ORF_2431	conserved hypothetical protein	120	up
ORF_2439	dihydrouridine synthase	1074	up
ORF_2440	transcription regulator	747	up
ORF_2444	conserved hypothetical protein	423	up
ORF_2451	integral membrane protein PlnW	687	up
ORF_2453	integral membrane protein PlnU	669	up
ORF_2456	bacteriocin ABC transporter, accessory factor PlnH	249	up
ORF_2457	PlnH	225	up
ORF_2458	bacteriocin ABC-transporter, ATP-binding and permease protein PlnG	2151	up
ORF_2459	bacteriocin precursor peptide PlnE (putative)	171	up
ORF_2460	membrane-bound protease CAAX family immunity protein PlnI	774	up
ORF_2461	response regulator PlnD, repressor	744	up
ORF_2462	response regulator PlnC, activator	744	up
ORF_2463	histidine protein kinase PlnB, sensor protein	795	up
ORF_2465	immunity protein PlnP	747	up
ORF_2466	plantaricin biosynthesis protein PlnO	1200	up
ORF_2467	bacteriocin precursor peptide PlnN (putative)	168	up
ORF_2468	immunity protein PlnM	201	up
ORF_2481	integral membrane protein	264	up
ORF_2482	conserved hypothetical protein	918	up
ORF_2483	extracellular protein	921	up
ORF_2490	conserved hypothetical protein	1101	up
ORF_2493	ribosomal protein S30EA	567	up
ORF_2499	phosphate ABC superfamily ATP binding cassette transporter, binding protein	876	up
ORF_2500	phosphate ABC transporter, permease protein	930	up
ORF_2501	phosphate ABC transporter, permease protein	885	up
ORF_2502	phosphate ABC transporter, ATP-binding protein	810	up
ORF_2503	phosphate ABC transporter, ATP-binding protein	756	up
ORF_2504	phosphate transport system protein	675	up
ORF_2505	stress-responsive transcription regulator (putative)	312	up
ORF_2506	integral membrane protein	366	up
ORF_2507	HPr kinase/phosphorylase	948	up
ORF_2508	prolipoprotein diacylglyceryl transferase	849	up
ORF_2509	NAD(P)H-dependent glycerol-3-phosphate dehydrogenase	1017	up
ORF_2514	ORF-11	351	up
ORF_2515	ORF-12	285	up
ORF_2527	lysozyme	807	up
ORF_2528	muramidase	453	up
ORF_2530	conserved hypothetical protein	660	up
ORF_2531	2,5-diketo-D-gluconate reductase	495	up
ORF_2537	transcription regulator (putative)	585	up
ORF_2541	conserved hypothetical protein	249	up
ORF_2544	xylose operon regulator	450	up
ORF_2545	xylose operon regulator	642	up
ORF_2546	PFL4705 family integrating conjugative element protein	1038	up
ORF_2552	conserved hypothetical protein	435	up
ORF_2561	histidine protein kinase; sensor protein	1161	up
ORF_2562	response regulator	690	up
ORF_2565	guanosine 5'-monophosphate oxidoreductase	1152	up
ORF_2575	conserved hypothetical protein	834	up
ORF_2576	transcription regulator	897	up
ORF_2578	amino acid ABC transporter, substrate binding protein	804	up
ORF_2579	amino acid ABC transporter, permease protein	708	up
ORF_2582	conserved hypothetical protein	576	up
ORF_2591	ABC transporter, ATP-binding protein	651	up
ORF_2595	cof family hydrolase	825	up
ORF_2597	family 38 glycosyl hydrolase	2559	up
ORF_2598	phosphotransferase system fructose-specific component IIA	1101	up
ORF_2599	conserved hypothetical protein	321	up
ORF_2600	PTS family fructose/mannitol (fru) porter component IIA	462	up
ORF_2601	transcription regulator, mannitol operon	1905	up
ORF_2602	conserved hypothetical protein	459	up
ORF_2603	oxidoreductase	864	up
ORF_2604	beta-glucosides PTS, EIIABC	1995	up
ORF_2609	conserved hypothetical protein	1257	up
ORF_2610	conserved hypothetical protein	600	up
ORF_2611	ferric uptake regulator	483	up
ORF_2613	conserved hypothetical protein	228	up
ORF_2614	3',5'-cyclic-nucleotide phosphodiesterase	855	up
ORF_2620	zinc-dependent proteinase (putative)	699	up
ORF_2625	cell surface hydrolase, membrane-bound (putative)	843	up
ORF_2632	protein-tyrosine phosphatase	786	up
ORF_2634	conserved hypothetical protein	150	up
ORF_2637	cation efflux protein	945	up
ORF_2638	transport protein	1047	up
ORF_2641	quaternary ammonium compound-resistance protein	384	up
ORF_2642	quaternary ammonium compound-resistance protein	309	up
ORF_2644	ArsR family transcriptional regulator	345	up
ORF_2645	cation efflux protein	888	up
ORF_2646	transcription regulator	594	up
ORF_2647	conserved hypothetical protein	234	up
ORF_2653	GTP cyclohydrolase I	570	up
ORF_2655	dihydroneopterin aldolase	369	up
ORF_2656	conserved hypothetical protein	153	up
ORF_2657	integral membrane protein (putative)	534	up
ORF_2665	conserved hypothetical protein	330	up
ORF_2666	PTS system mannose/fructose/N-acetylgalactosamine-specific transporter subunit IID	846	up
ORF_2667	phosphotransferase system, mannose/fructose/N-acetylgalactosamine-specific component IIC	849	up
ORF_2668	Fructose/mannose phosphotransferase system IIB component	495	up
ORF_2669	levA protein	435	up
ORF_2671	resolvase	174	up
ORF_2677	conserved hypothetical protein	393	up
ORF_2678	hydroxymethylglutaryl-CoA synthase	1170	up
ORF_2681	protein of hypothetical function DUF896	258	up
ORF_2683	1-acylglycerol-3-phosphate O-acyltransferase	636	up
ORF_2699	conserved hypothetical protein	477	up
ORF_2712	FAD synthetase	1002	up
ORF_2713	alpha-acetolactate decarboxylase	711	up
ORF_2714	heat-inducible transcription repressor	1044	up
ORF_2715	co-chaperone GrpE	609	up
ORF_2716	molecular chaperone DnaK	1869	up
ORF_2717	chaperone protein DnaJ	1143	up
ORF_2724	GTP-binding protein LepA	1836	up
ORF_2725	conserved hypothetical protein	291	up
ORF_2753	DNA primase DnaG	1881	up
ORF_2754	RNA polymerase sigma factor RpoD	1107	up
ORF_2763	transcription regulator	468	up
ORF_2765	conserved hypothetical protein	150	up
ORF_2766	ABC superfamily ATP binding cassette transporter, ABC protein	888	up
ORF_2767	ABC transporter, permease protein	771	up
ORF_2768	histidine protein kinase; sensor protein	1104	up
ORF_2771	conserved hypothetical protein	249	up
ORF_2772	oxidoreductase	945	up
ORF_2773	transcription regulator	891	up
ORF_2776	cell surface hydrolase (putative)	816	up
ORF_2777	transcription regulator	714	up
ORF_2780	conserved hypothetical protein	1680	up
ORF_2782	conserved hypothetical protein	390	up
ORF_2783	negative regulator of proteolysis	402	up
ORF_2784	7,8-dihydro-8-oxoguanine-triphosphatase (putative)	606	up
ORF_2785	transcription regulator	753	up
ORF_2786	NADH oxidase (putative)	1692	up
ORF_2787	succinyl-diaminopimelate desuccinylase	1146	up
ORF_2788	transcription regulator (putative)	450	up
ORF_2790	phosphopyruvate hydratase	1290	up
ORF_2791	cadmium-/manganese-transporting P-type ATPase	2277	up
ORF_2792	oxidoreductase	975	up
ORF_2793	conserved hypothetical protein	144	up
ORF_2797	conserved hypothetical protein	369	up
ORF_2798	phosphoenolpyruvate synthase	2397	up
ORF_2801	ABC transporter, permease protein	771	up
ORF_2802	integral membrane protein	1206	up
ORF_2805	peptidase T	1239	up
ORF_2818	integral membrane protein	585	up
ORF_2826	conserved hypothetical protein	1269	up
ORF_2827	HAD superfamily hydrolase	798	up
ORF_2828	conserved hypothetical protein	135	up
ORF_2829	dihydrodipicolinate reductase	786	up
ORF_2830	tRNA CCA-pyrophosphorylase	1224	up
ORF_2831	conserved hypothetical protein	453	up
ORF_2832	ABC transporter, ATP-binding protein	1911	up
ORF_2857	acyl-phosphate glycerol 3-phosphate acyltransferase	627	up
ORF_2862	peptide-methionine (R)-S-oxide reductase	435	up
ORF_2863	protein-methionine-S-oxide reductase	516	up
ORF_2864	conserved hypothetical protein	201	up
ORF_2865	conserved hypothetical protein	855	up
ORF_2868	integral membrane protein	408	up
ORF_2879	lipoprotein precursor	885	up
ORF_2885	conserved hypothetical protein	333	up
ORF_2890	integral membrane protein	291	up
ORF_2891	integral membrane protein	387	up
ORF_2898	MutT/NUDIX family protein	495	up
ORF_2899	conserved hypothetical protein	726	up
ORF_2900	conserved hypothetical protein	372	up
ORF_2901	chloramphenicol O-acetyltransferase	669	up
ORF_2906	carbamoyl phosphate synthase large subunit	2562	up
ORF_2907	carbamoyl phosphate synthase small subunit	1083	up
ORF_2908	pyrimidine regulatory protein PyrR	525	up
ORF_2924	glycosyltransferase	1341	up
ORF_2925	conserved hypothetical protein	408	up
ORF_2956	HAD superfamily hydrolase	810	up
ORF_2961	potassium transport protein	777	up
ORF_2962	prenyltransferase	918	up
ORF_2969	conserved hypothetical protein	222	up
ORF_2976	conserved hypothetical protein	459	up
ORF_2977	sensory protein	486	up
ORF_2978	conserved hypothetical protein	249	up
ORF_2979	antibiotic biosynthesis monooxygenase subfamily	282	up
ORF_2980	chitin-binding protein/carbohydrate-binding protein	606	up
ORF_2981	cyclopropane-fatty-acyl-phospholipid synthase	1173	up
ORF_2982	integral membrane protein	201	up
ORF_3006	transcription regulator	987	up
ORF_3008	integral membrane protein	363	up
ORF_3009	alcohol dehydrogenase	1044	up
ORF_3010	aminohydrolase	1134	up
ORF_3016	tryptophan synthase beta subunit	1200	up
ORF_3018	indole-3-glycerol-phosphate synthase	783	up
ORF_3025	conserved hypothetical protein	471	up
ORF_3026	cell surface protein	3756	up
ORF_3027	hypothetical protein	390	up
ORF_3039	acyl carrier protein	246	up
ORF_3084	glutamate--ammonia ligase	1347	up
ORF_3085	glutamine synthetase repressor	381	up
ORF_3089	conserved hypothetical protein	414	up
ORF_3100	transcription elongation factor GreA	483	up
ORF_3101	uridine kinase	630	up
ORF_3102	conserved hypothetical protein	1191	up
ORF_3105	MarR family transcriptional regulator	360	up
ORF_3106	conserved hypothetical protein	510	up
ORF_3108	acylphosphatase (putative)	273	up
ORF_3110	integral membrane protein	579	up
ORF_3119	succinate-semialdehyde dehydrogenase (NAD(P)+)	591	up
ORF_3127	stress induced DNA binding protein (putative)	555	up
ORF_3128	conserved hypothetical protein	219	up
ORF_3129	transcription regulator	666	up
ORF_3130	endopeptidase PepO	1917	up
ORF_3133	transport protein	1221	up
ORF_3135	integral membrane protein	567	up
ORF_3139	transcription regulator (putative)	366	up
ORF_3140	conserved hypothetical protein	222	up
ORF_3145	conserved hypothetical protein	144	up
ORF_3146	conserved hypothetical protein	132	up
ORF_3147	conserved hypothetical protein	132	up
ORF_3148	conserved hypothetical protein	132	up
ORF_3149	conserved hypothetical protein	2763	up
ORF_3150	conserved hypothetical protein	1977	up
ORF_0007	conserved hypothetical protein	375	down
ORF_0008	conserved hypothetical protein	126	down
ORF_0009	conserved hypothetical protein	792	down
ORF_0028	L-2-hydroxyisocaproate dehydrogenase	927	down
ORF_0035	peptide chain release factor 3	1578	down
ORF_0043	hypothetical protein	150	down
ORF_0044	oligopeptide ABC superfamily ATP binding cassette transporter, binding protein	1506	down
ORF_0045	oligopeptide ABC transporter, permease protein	930	down
ORF_0046	oligopeptide ABC transporter, permease protein	1035	down
ORF_0047	oligopeptide ABC transporter, ATP-binding protein	1080	down
ORF_0048	oligopeptide ABC transporter, ATP-binding protein	966	down
ORF_0055	glycosyltransferase	1179	down
ORF_0056	glycosyltransferase	1023	down
ORF_0057	integral membrane protein	1056	down
ORF_0058	serine-type D-Ala-D-Ala carboxypeptidase	1239	down
ORF_0059	aromatic amino acid aminotransferase	1188	down
ORF_0071	IS transposase	213	down
ORF_0082	tRNA uridine 5-carboxymethylaminomethyl modification enzyme GidA	1911	down
ORF_0083	tRNA modification GTPase TrmE	1392	down
ORF_0085	cell division protein	711	down
ORF_0092	recombination protein F	1125	down
ORF_0093	DNA gyrase, B subunit	1947	down
ORF_0094	DNA gyrase, A subunit	2562	down
ORF_0113	beta-phosphoglucomutase	672	down
ORF_0114	glycosyl hydrolase	2721	down
ORF_0116	cold shock protein CspA	201	down
ORF_0117	conserved hypothetical protein	225	down
ORF_0140	beta-phosphoglucomutase	672	down
ORF_0141	choloylglycine hydrolase	1017	down
ORF_0144	4-hydroxyphenylacetate-3-hydroxylase	1437	down
ORF_0145	conserved hypothetical protein	450	down
ORF_0174	conserved hypothetical protein	306	down
ORF_0175	Na+/H+ antiporter NhaC	1425	down
ORF_0189	conserved hypothetical protein	144	down
ORF_0193	integral membrane protein	699	down
ORF_0194	integral membrane protein	678	down
ORF_0196	copper transporting ATPase	2040	down
ORF_0206	MFS family major facilitator transporter, multidrug:cation symporter MdtG	1224	down
ORF_0208	conserved hypothetical protein	471	down
ORF_0240	di-/tripeptide transport protein	1473	down
ORF_0252	transport protein	1224	down
ORF_0266	galactose operon repressor	996	down
ORF_0267	aldose 1-epimerase	1035	down
ORF_0268	sugar transport protein	1959	down
ORF_0270	beta-galactosidase, small subunit	960	down
ORF_0271	beta-galactosidase large subunit	1881	down
ORF_0272	galactokinase	1164	down
ORF_0283	transcription regulator of beta-galactosidase gene	1011	down
ORF_0286	branched-chain amino acid transport protein	540	down
ORF_0287	branched-chain amino acid transport protein	303	down
ORF_0292	ferrichrome ABC transporter, permease protein	996	down
ORF_0329	multidrug transport protein (putative)	1416	down
ORF_0331	conserved hypothetical protein	1080	down
ORF_0332	conserved hypothetical protein	564	down
ORF_0333	prophage Lp4 protein 1, integrase	1158	down
ORF_0334	conserved hypothetical protein	669	down
ORF_0360	conserved hypothetical protein	216	down
ORF_0361	hypothetical protein	228	down
ORF_0362	putative uncharacterized protein	243	down
ORF_0363	terminase	1680	down
ORF_0364	phage portal protein, HK97 family	1143	down
ORF_0365	Clp protease domain protein	753	down
ORF_0366	major head protein Cps	1179	down
ORF_0367	putative uncharacterized protein	306	down
ORF_0368	Gp8 protein	213	down
ORF_0369	gp9 protein	408	down
ORF_0370	gp10 protein	423	down
ORF_0371	putative major tail protein	612	down
ORF_0372	putative uncharacterized protein	315	down
ORF_0373	hypothetical protein	222	down
ORF_0374	phage tail tape measure protein	4545	down
ORF_0375	putative uncharacterized protein	822	down
ORF_0376	reticulocyte binding protein	4947	down
ORF_0386	conserved hypothetical protein	273	down
ORF_0387	conserved hypothetical protein	432	down
ORF_0388	manganese transport protein	1593	down
ORF_0394	branched-chain amino acid ABC transporter, substrate binding protein	1194	down
ORF_0423	integral membrane protein	972	down
ORF_0424	conserved hypothetical protein	1449	down
ORF_0446	transcription regulator	912	down
ORF_0448	excinuclease ABC, subunit A	2508	down
ORF_0452	CAAX family protease	1206	down
ORF_0453	conserved hypothetical protein	831	down
ORF_0471	maltose O-acetyltransferase	570	down
ORF_0496	ABC transporter, permease protein (putative)	1218	down
ORF_0497	ABC superfamily ATP binding cassette transporter, ABC protein	900	down
ORF_0500	transcription regulator (putative)	567	down
ORF_0503	asparagine synthase (glutamine-hydrolysing)	1902	down
ORF_0530	extracellular protein	396	down
ORF_0546	oxidoreductase (putative)	639	down
ORF_0554	DNA-3-methyladenine glycosylase I	645	down
ORF_0555	conserved hypothetical protein	525	down
ORF_0559	extracellular protein	663	down
ORF_0560	extracellular protein	615	down
ORF_0563	6-phospho-beta-glucosidase	1383	down
ORF_0577	integral membrane protein	327	down
ORF_0579	aspartate kinase I	1203	down
ORF_0597	aspartate--ammonia ligase	1008	down
ORF_0598	asparaginyl-tRNA synthetase	1296	down
ORF_0618	hypothetical protein	117	down
ORF_0673	aspartate transaminase	1275	down
ORF_0683	amino acid permease	1398	down
ORF_0696	lipopolysaccharide biosynthesis protein LicD	810	down
ORF_0706	hypothetical protein	135	down
ORF_0714	conserved hypothetical protein	234	down
ORF_0715	cobalt ABC transporter, ATP-binding protein (putative)	732	down
ORF_0716	cobalt transport protein	822	down
ORF_0719	conserved hypothetical protein	1275	down
ORF_0720	phosphoribosylaminoimidazole carboxylase catalytic subunit	741	down
ORF_0721	conserved hypothetical protein	792	down
ORF_0733	amino acid transport protein	1365	down
ORF_0753	conserved hypothetical protein	1518	down
ORF_0755	ABC transporter, permease protein	840	down
ORF_0756	ABC superfamily ATP binding cassette transporter, ABC protein	1701	down
ORF_0757	conserved hypothetical protein	561	down
ORF_0758	conserved hypothetical protein	129	down
ORF_0779	maltose ABC superfamily ATP binding cassette transporter, maltose-binding protein	1254	down
ORF_0780	maltose/maltodextrin ABC transporter, permease protein	1290	down
ORF_0813	transcription regulator	738	down
ORF_0819	extracellular protein, gamma-D-glutamate-meso-diaminopimelate muropeptidase (putative)	1068	down
ORF_0825	conserved hypothetical protein	579	down
ORF_0826	iron dependent peroxidase (putative)	954	down
ORF_0828	conserved hypothetical protein	696	down
ORF_0830	NADH peroxidase	1356	down
ORF_0835	homoserine O-succinyltransferase	876	down
ORF_0836	O-acetylhomoserine (thiol)-lyase	1287	down
ORF_0839	2-dehydropantoate 2-reductase	975	down
ORF_0842	ring-cleaving dioxygenase (putative)	450	down
ORF_0877	glycine betaine/carnitine/choline ABC transporter, substrate binding and permease protein	1527	down
ORF_0878	glycine betaine/carnitine/choline ABC transporter, ATP-binding protein	972	down
ORF_0898	amino acid ABC transporter, permease protein	678	down
ORF_0900	GAF domain protein	480	down
ORF_0902	amino acid permease-associated region	1386	down
ORF_0903	Hin-like DNA-binding protein	288	down
ORF_0904	hypothetical protein	162	down
ORF_0905	hypothetical protein	129	down
ORF_0907	hypothetical protein	198	down
ORF_0910	cellulose synthase catalytic subunit	225	down
ORF_0911	cellulose synthase catalytic subunit	1659	down
ORF_0942	chloride channel protein	1554	down
ORF_0975	conserved hypothetical protein	837	down
ORF_0976	conserved hypothetical protein	330	down
ORF_0981	integral membrane protein	639	down
ORF_0987	amino acid transport protein	1386	down
ORF_1021	alanine--tRNA ligase	2643	down
ORF_1030	conserved hypothetical protein	132	down
ORF_1036	accesory gene regulator protein B	603	down
ORF_1037	accessory gene regulator protein C	1263	down
ORF_1038	response regulator; accesory gene regulator protein A	744	down
ORF_1083	transcription antiterminator	849	down
ORF_1084	beta-glucosides PTS, EIIBCA	2001	down
ORF_1097	formate C-acetyltransferase	2259	down
ORF_1108	extracellular protein	804	down
ORF_1109	extracellular protein	639	down
ORF_1110	glycine cleavage system	375	down
ORF_1111	conserved hypothetical protein	885	down
ORF_1112	conserved hypothetical protein	717	down
ORF_1122	spermidine/putrescine ABC transporter, substrate binding protein	1071	down
ORF_1135	fructose-bisphosphate aldolase	864	down
ORF_1136	hypothetical protein	225	down
ORF_1138	conserved hypothetical protein	903	down
ORF_1139	conserved hypothetical protein	201	down
ORF_1177	methylated-DNA--	501	down
ORF_1179	ATP-dependent RNA helicase	1467	down
ORF_1181	type III restriction protein res subunit	1377	down
ORF_1182	hypothetical protein	174	down
ORF_1183	conserved hypothetical protein	2016	down
ORF_1184	hypothetical protein	465	down
ORF_1185	conserved hypothetical protein	120	down
ORF_1187	serine O-acetyltransferase	177	down
ORF_1188	Glycosyltransferases involved in cell wall biogenesis	981	down
ORF_1190	conserved hypothetical protein	1125	down
ORF_1191	alpha-D-GlcNAc alpha-1,2-L-rhamnosyltransferase	228	down
ORF_1192	IS30 family transposase	921	down
ORF_1208	rRNA large subunit methyltransferase A	855	down
ORF_1209	conserved hypothetical protein	126	down
ORF_1222	UDP-N-acetylmuramoyl-L-alanyl-D-glutamate synthetase	1380	down
ORF_1223	N-acetylglucosaminyl transferase	1092	down
ORF_1224	cell division initiation protein FtsQ	876	down
ORF_1226	cell division protein FtsZ	1284	down
ORF_1227	cell division protein (putative)	423	down
ORF_1229	cell division protein (putative)	786	down
ORF_1230	cell division initiation protein DivIVA	699	down
ORF_1231	isoleucyl-tRNA synthetase	2799	down
ORF_1253	extracellular protein, gamma-D-glutamate-meso-diaminopimelate muropeptidase (putative)	1491	down
ORF_1255	transcription regulator	960	down
ORF_1256	metallo-beta-lactamase superfamily protein (putative)	1677	down
ORF_1260	pyruvate dehydrogenase complex, E1 component, alpha subunit	1113	down
ORF_1269	adenine phosphoribosyltransferase	543	down
ORF_1270	integral membrane protein	1074	down
ORF_1276	amino acid transport protein	1383	down
ORF_1277	homocysteine methyltransferase	930	down
ORF_1292	leucyl-tRNA synthetase	2427	down
ORF_1320	extracellular protein, membrane-anchored (putative)	339	down
ORF_1332	bifunctional homocysteine S-methyltransferase/5,10-methylenetetrahydrofolate reductase protein	1857	down
ORF_1333	5-methyltetrahydropteroyltriglutamate--homocysteine S-methyltransferase	2307	down
ORF_1414	conserved hypothetical protein	165	down
ORF_1415	FeoB family ferrous iron (Fe2+) uptake protein	1989	down
ORF_1416	conserved hypothetical protein	225	down
ORF_1431	threonine-tRNA ligase 1	1965	down
ORF_1432	translation initiation factor IF-3	501	down
ORF_1433	ribosomal protein L35	195	down
ORF_1434	50S ribosomal protein L20	357	down
ORF_1457	histidine protein kinase; sensor protein	1644	down
ORF_1458	hypothetical protein	228	down
ORF_1459	hypothetical protein	204	down
ORF_1460	conserved hypothetical protein	336	down
ORF_1461	ATPase involved in chromosome partitioning	810	down
ORF_1462	hypothetical protein	114	down
ORF_1463	plasmid replication initiation protein	405	down
ORF_1464	conserved hypothetical protein	198	down
ORF_1465	conserved hypothetical protein	756	down
ORF_1466	hypothetical protein	129	down
ORF_1474	putative glycosyl transferase	960	down
ORF_1475	putative lipopolysaccharide biosynthesis protein	1428	down
ORF_1476	capsular polysaccharide biosynthesis protein CpsI	1020	down
ORF_1477	CDP-glycerol:poly(glycerophosphate) glycerophosphotransferase	1194	down
ORF_1478	EpsIIN, glycerol-3-phosphate cytidylyltransferase	375	down
ORF_1479	Transposase	132	down
ORF_1480	glycosyl transferase, group 2 family	258	down
ORF_1501	dipeptidase	1416	down
ORF_1506	conserved hypothetical protein	552	down
ORF_1528	transcription regulator	720	down
ORF_1562	glycosyltransferase (putative)	1356	down
ORF_1563	integral membrane protein	1590	down
ORF_1575	ribosomal protein S15	270	down
ORF_1579	conserved hypothetical protein	915	down
ORF_1580	elongation factor Tu	1188	down
ORF_1581	trigger factor	1323	down
ORF_1621	conserved hypothetical protein	618	down
ORF_1626	ABC transporter, permease protein (putative)	1068	down
ORF_1627	ABC transporter, ATP-binding protein	681	down
ORF_1639	lipoprotein precursor, peptide binding protein OppA-like protein	1662	down
ORF_1640	possible acetyltransferase	444	down
ORF_1641	phosphoglycerate dehydrogenase	1179	down
ORF_1642	phosphoserine aminotransferase	1074	down
ORF_1646	conserved hypothetical protein	351	down
ORF_1647	adherence protein	366	down
ORF_1693	valyl-tRNA synthetase	2670	down
ORF_1710	beta-lactamase (putative)	1131	down
ORF_1727	F0F1 ATP synthase subunit epsilon	429	down
ORF_1748	branched-chain amino acid aminotransferase	1029	down
ORF_1756	prophage Lp1 protein 59	297	down
ORF_1757	prophage Lp1 protein 58, lysin	1167	down
ORF_1796	conserved hypothetical protein	423	down
ORF_1797	prophage Lp1 protein 2	720	down
ORF_1798	HsdR family type I site-specific deoxyribonuclease	3138	down
ORF_1822	conserved hypothetical protein	234	down
ORF_1892	xylose isomerase	1350	down
ORF_1938	ribosomal protein L7/L12	369	down
ORF_1939	ribosomal protein L10	504	down
ORF_1940	50S ribosomal protein L1	690	down
ORF_1941	50S ribosomal protein L11	426	down
ORF_1961	transport protein	1026	down
ORF_1962	malate transport protein	963	down
ORF_2001	cold shock protein CspP	201	down
ORF_2033	amino acid transport protein	1428	down
ORF_2039	fumarate reductase subunit A	1389	down
ORF_2040	fumarate hydratase	1383	down
ORF_2051	manganese ABC transporter, substrate binding protein	942	down
ORF_2052	manganese ABC superfamily ATP binding cassette transporter, permease protein	876	down
ORF_2053	manganese ABC transporter, ATP-binding protein	738	down
ORF_2054	triphosphoribosyl-dephospho-CoA synthase	843	down
ORF_2055	transcription regulator	1026	down
ORF_2067	30S ribosomal protein S9	393	down
ORF_2068	50S ribosomal protein L13	444	down
ORF_2074	conserved hypothetical protein	114	down
ORF_2080	ribosomal protein L17	384	down
ORF_2081	DNA-directed RNA polymerase subunit alpha	945	down
ORF_2082	30S ribosomal protein S11	390	down
ORF_2083	30S ribosomal protein S13	366	down
ORF_2084	translation initiation factor IF-1	219	down
ORF_2085	adenylate kinase	660	down
ORF_2086	preprotein translocase subunit SecY	1134	down
ORF_2087	ribosomal protein L15	432	down
ORF_2088	50S ribosomal protein L30	183	down
ORF_2089	30S ribosomal protein S5	501	down
ORF_2090	ribosomal protein L18	357	down
ORF_2091	50S ribosomal protein L6	537	down
ORF_2092	30S ribosomal protein S8	396	down
ORF_2093	50S ribosomal protein L5	543	down
ORF_2094	ribosomal protein L24	312	down
ORF_2095	ribosomal protein L14	369	down
ORF_2096	30S ribosomal protein S17	270	down
ORF_2097	50S ribosomal protein L29	195	down
ORF_2098	50S ribosomal protein L16	435	down
ORF_2099	30S ribosomal protein S3	654	down
ORF_2100	50S ribosomal protein L22	348	down
ORF_2101	30S ribosomal protein S19	276	down
ORF_2102	50S ribosomal protein L2	840	down
ORF_2103	50S ribosomal protein L23	294	down
ORF_2104	50S ribosomal protein L4	624	down
ORF_2105	50S ribosomal protein L3	630	down
ORF_2106	30S ribosomal protein S10	309	down
ORF_2107	elongation factor G	2097	down
ORF_2108	30S ribosomal protein S7	471	down
ORF_2109	30S ribosomal protein S12	414	down
ORF_2110	type 4 prepilin-like proteins leader peptide processing enzyme (putative)	408	down
ORF_2111	DNA-directed RNA polymerase subunit beta'	3654	down
ORF_2112	DNA-directed RNA polymerase subunit beta	3606	down
ORF_2117	seryl-tRNA synthetase	1278	down
ORF_2131	cold shock protein CspC	201	down
ORF_2136	conserved hypothetical protein	723	down
ORF_2141	lysin	1302	down
ORF_2142	conserved hypothetical protein	666	down
ORF_2159	conserved hypothetical protein	639	down
ORF_2160	conserved hypothetical protein	126	down
ORF_2169	carbamoyl phosphate synthase small subunit	1068	down
ORF_2177	alanine racemase	1128	down
ORF_2178	holo-	363	down
ORF_2213	thioredoxin reductase (NADPH)	996	down
ORF_2219	ribonuclease H (putative)	897	down
ORF_2222	transcription regulator	864	down
ORF_2227	conserved hypothetical protein	129	down
ORF_2231	ABC transporter, ATP-binding protein	711	down
ORF_2232	transcription regulator	390	down
ORF_2234	alpha/beta hydrolase	924	down
ORF_2253	pseudouridylate synthase	903	down
ORF_2260	phosphoketolase	2367	down
ORF_2288	ATP-dependent nuclease subunit A	3750	down
ORF_2299	purine transport regulator	1590	down
ORF_2302	xanthine/uracil permease	1251	down
ORF_2307	glycosyltransferase (putative)	1329	down
ORF_2309	phosphoribosylamine--glycine ligase	1242	down
ORF_2310	bifunctional purine biosynthesis protein PurH	1533	down
ORF_2311	phosphoribosylglycinamide formyltransferase	579	down
ORF_2312	phosphoribosylaminoimidazole synthetase	1026	down
ORF_2313	amidophosphoribosyltransferase	1455	down
ORF_2390	conserved hypothetical protein	1137	down
ORF_2392	transcription termination factor Rho	1293	down
ORF_2399	serine--tRNA ligase	1272	down
ORF_2407	cof family protein	810	down
ORF_2408	conserved hypothetical protein	123	down
ORF_2418	zinc/iron ABC transporter, permease protein	804	down
ORF_2419	zinc/iron ABC transporter, ATP-binding protein	699	down
ORF_2428	methionine--tRNA ligase	2052	down
ORF_2470	plantaricin JK family bacteriocin	174	down
ORF_2477	transport protein	1155	down
ORF_2478	galactoside O-acetyltransferase	618	down
ORF_2484	glycine betaine/carnitine/choline transport protein	1668	down
ORF_2485	cadmium-/zinc-/cobalt-transporting ATPase	1845	down
ORF_2486	conserved hypothetical protein	180	down
ORF_2495	peptide chain release factor 2	1074	down
ORF_2517	ribonucleoside-diphosphate reductase	2169	down
ORF_2518	ribonucleoside-diphosphate reductase beta subunit	927	down
ORF_2519	ribonucleoside-diphosphate reductase beta subunit	951	down
ORF_2526	malate dehydrogenase (putative)	1089	down
ORF_2551	extracellular protein	555	down
ORF_2556	transport protein	723	down
ORF_2566	integral membrane protein	726	down
ORF_2567	translation-associated GTPase	1101	down
ORF_2568	conserved hypothetical protein	192	down
ORF_2569	chromosome partitioning protein, DNA-binding protein	891	down
ORF_2570	chromosome partitioning protein, membrane-associated ATPase	768	down
ORF_2571	chromosome partitioning protein, DNA-binding protein	852	down
ORF_2572	16S rRNA methyltransferase GidB	735	down
ORF_2574	integral membrane protein	2952	down
ORF_2612	bacteriocin immunity protein	357	down
ORF_2616	effector of murein hydrolase (putative)	420	down
ORF_2622	squalene synthase	1497	down
ORF_2623	phytoene synthase	882	down
ORF_2624	hypothetical protein	117	down
ORF_2648	conserved hypothetical protein	168	down
ORF_2658	ABC superfamily ATP binding cassette transporter, binding protein	981	down
ORF_2661	conserved hypothetical protein	1206	down
ORF_2662	putative bacitracin synthetase 1	3081	down
ORF_2663	putative polyketide synthase	2778	down
ORF_2664	4'-phosphopantetheinyl transferase, CesP	717	down
ORF_2705	transport protein	1455	down
ORF_2706	chorismate synthase	1170	down
ORF_2707	conserved hypothetical protein	528	down
ORF_2718	serine-type D-Ala-D-Ala carboxypeptidase	1176	down
ORF_2719	D-Ala-teichoic acid biosynthesis protein (putative)	150	down
ORF_2720	D-alanine--D-alanyl carrier protein ligase	1527	down
ORF_2721	D-alanyl transfer protein DltB	1215	down
ORF_2722	D-alanine--poly(phosphoribitol) ligase subunit 2	237	down
ORF_2723	D-alanyl transfer protein DltD	1278	down
ORF_2736	histidyl-tRNA synthetase	1281	down
ORF_2737	aspartyl-tRNA synthetase	1797	down
ORF_2738	protein-methionine-S-oxide reductase	531	down
ORF_2744	30S ribosomal protein S21	189	down
ORF_2745	conserved hypothetical protein	444	down
ORF_2750	recombination protein O	789	down
ORF_2751	glycyl-tRNA synthetase subunit alpha	900	down
ORF_2752	glycine-tRNA ligase, beta chain	2085	down
ORF_2813	tyrosine recombinase XerD	918	down
ORF_2824	GTP-binding protein EngA	1311	down
ORF_2845	transcription regulator	930	down
ORF_2852	tRNA:M(5)U-54 methyltransferase	1326	down
ORF_2871	protease synthase and sporulation negative regulatory protein pai 1	528	down
ORF_2872	ribitolphosphotransferase	1896	down
ORF_2873	ribitolphosphotransferase	1107	down
ORF_2886	transport protein	1188	down
ORF_2915	hydrolase	795	down
ORF_2917	conserved hypothetical protein	141	down
ORF_2918	ABC transporter, ATP-binding protein	678	down
ORF_2919	transport protein	753	down
ORF_2920	microcin immunity protein	969	down
ORF_2932	penicillin binding protein 1A	2304	down
ORF_2935	ABC transporter, permease protein	1686	down
ORF_2938	amino acid ABC transporter, substrate binding protein	858	down
ORF_2939	amino acid ABC transporter, permease protein	672	down
ORF_2940	amino acid ABC transporter, ATP-binding protein	1068	down
ORF_2946	mevalonate kinase	939	down
ORF_2947	diphosphomevalonate decarboxylase	978	down
ORF_2950	aldose 1-epimerase	1014	down
ORF_2951	maltose phosphorylase	2247	down
ORF_2952	sugar transport protein (putative)	1347	down
ORF_2963	conserved hypothetical protein	117	down
ORF_2964	diaminopimelate decarboxylase	1326	down
ORF_2965	4-oxalocrotonate tautomerase	195	down
ORF_2971	integral membrane protein	267	down
ORF_2972	conserved hypothetical protein	120	down
ORF_2973	integral membrane protein	249	down
ORF_2992	integral membrane protein	726	down
ORF_2993	phosphopantetheinyltransferase	552	down
ORF_2994	enoyl-(acyl carrier protein) reductase	759	down
ORF_2995	acetyl-CoA carboxylase, carboxyl transferase subunit alpha	771	down
ORF_2996	acetyl-CoA carboxylase, carboxyl transferase subunit beta	843	down
ORF_2997	acetyl-CoA carboxylase, biotin carboxylase subunit	1389	down
ORF_2998	(3R)-hydroxymyristoyl-(acyl carrier protein) dehydratase	414	down
ORF_2999	acetyl-CoA carboxylase, biotin carboxyl carrier protein	462	down
ORF_3000	3-oxoacyl-(acyl-carrier protein) synthase II	1233	down
ORF_3001	3-oxoacyl-	723	down
ORF_3002	(acyl-carrier protein) S-malonyltransferase	933	down
ORF_3003	acyl carrier protein	249	down
ORF_3004	3-oxoacyl-(acyl carrier protein) synthase III	987	down
ORF_3005	(3R)-hydroxymyristoyl-[acyl carrier protein] dehydratase	444	down
ORF_3022	conserved hypothetical protein	150	down
ORF_3023	ABC superfamily ATP binding cassette transporter, membrane protein	1596	down
ORF_3029	50S ribosomal protein L19	357	down
ORF_3032	conserved hypothetical protein	258	down
ORF_3033	30S ribosomal protein S16	273	down
ORF_3044	ribosomal protein L28	186	down
ORF_3045	conserved hypothetical protein	156	down
ORF_3046	conserved hypothetical protein	660	down
ORF_3047	ribulose-phosphate 3-epimerase	654	down
ORF_3048	translation factor, GTPase (putative)	897	down
ORF_3062	DNA repair protein RecN	1695	down
ORF_3073	50S ribosomal protein L27	279	down
ORF_3074	ribosomal protein (putative)	336	down
ORF_3075	ribosomal protein L21	309	down
ORF_3077	conserved hypothetical protein	156	down
ORF_3090	conserved hypothetical protein	621	down
ORF_3098	conserved hypothetical protein	456	down
ORF_3099	integral membrane protein	723	down
ORF_3112	exonuclease SbcC	3186	down
ORF_3113	prenyltransferase	969	down

## Sheet: PC36h_PC24h
Gene	Product	Length
ORF_0004	prophage Lp3 protein 24	207	up
ORF_0005	prophage Lp2 protein 2, integrase	1122	up
ORF_0008	conserved hypothetical protein	126	up
ORF_0009	conserved hypothetical protein	792	up
ORF_0011	transcription regulator	441	up
ORF_0018	conserved hypothetical protein	549	up
ORF_0025	serine-type D-Ala-D-Ala carboxypeptidase	1683	up
ORF_0026	hypothetical protein	174	up
ORF_0027	conserved hypothetical protein	561	up
ORF_0035	peptide chain release factor 3	1578	up
ORF_0043	hypothetical protein	150	up
ORF_0044	oligopeptide ABC superfamily ATP binding cassette transporter, binding protein	1506	up
ORF_0055	glycosyltransferase	1179	up
ORF_0056	glycosyltransferase	1023	up
ORF_0057	integral membrane protein	1056	up
ORF_0058	serine-type D-Ala-D-Ala carboxypeptidase	1239	up
ORF_0063	conserved hypothetical protein	828	up
ORF_0064	conserved hypothetical protein	372	up
ORF_0070	Protein of hypothetical function DUF1706	510	up
ORF_0076	conserved hypothetical protein	126	up
ORF_0091	conserved hypothetical protein	201	up
ORF_0092	recombination protein F	1125	up
ORF_0128	P-nitrobenzoate reductase	651	up
ORF_0155	oxidoreductase	1005	up
ORF_0167	conserved hypothetical protein	279	up
ORF_0172	NADH oxidase	1353	up
ORF_0174	conserved hypothetical protein	306	up
ORF_0184	A/G-specific adenine glycosylase (putative)	1101	up
ORF_0197	hypothetical protein	126	up
ORF_0206	MFS family major facilitator transporter, multidrug:cation symporter MdtG	1224	up
ORF_0208	conserved hypothetical protein	471	up
ORF_0220	phosphate ABC transporter, substrate binding protein	903	up
ORF_0242	transcription antiterminator	846	up
ORF_0253	transcription regulator	906	up
ORF_0278	transcription regulator	987	up
ORF_0282	RhaB1	1953	up
ORF_0302	cell surface protein (putative)	2253	up
ORF_0303	hypothetical protein	114	up
ORF_0306	conserved hypothetical protein	162	up
ORF_0310	fumarate reductase	1482	up
ORF_0318	beta-glucosides PTS, EIIBCA	1848	up
ORF_0319	conserved hypothetical protein	372	up
ORF_0324	integral membrane protein (putative)	1266	up
ORF_0332	conserved hypothetical protein	564	up
ORF_0333	prophage Lp4 protein 1, integrase	1158	up
ORF_0334	conserved hypothetical protein	669	up
ORF_0338	conserved hypothetical protein	210	up
ORF_0339	conserved hypothetical protein	273	up
ORF_0340	Gp40 protein	450	up
ORF_0341	conserved hypothetical protein	141	up
ORF_0342	hypothetical protein	171	up
ORF_0343	hypothetical protein	168	up
ORF_0344	conserved hypothetical protein	252	up
ORF_0345	conserved hypothetical protein	480	up
ORF_0346	Helicase-like protein:Type III restriction enzyme, res subunit:DEAD/DEAH box helicase-like protein	1260	up
ORF_0347	phage NTP-binding protein	717	up
ORF_0348	conserved hypothetical protein	600	up
ORF_0349	conserved hypothetical protein	555	up
ORF_0350	prophage Lp3 protein 7	795	up
ORF_0351	prophage Lp3 protein 8, helicase	1275	up
ORF_0352	phage protein	333	up
ORF_0353	conserved hypothetical protein	225	up
ORF_0354	prophage Lp1 protein 30	357	up
ORF_0360	conserved hypothetical protein	216	up
ORF_0361	hypothetical protein	228	up
ORF_0362	putative uncharacterized protein	243	up
ORF_0369	gp9 protein	408	up
ORF_0372	putative uncharacterized protein	315	up
ORF_0373	hypothetical protein	222	up
ORF_0374	phage tail tape measure protein	4545	up
ORF_0375	putative uncharacterized protein	822	up
ORF_0376	reticulocyte binding protein	4947	up
ORF_0394	branched-chain amino acid ABC transporter, substrate binding protein	1194	up
ORF_0401	cell surface protein precursor	1044	up
ORF_0431	transcription regulator	1005	up
ORF_0510	cell surface protein precursor	372	up
ORF_0511	extracellular protein	609	up
ORF_0512	cell surface protein precursor	1044	up
ORF_0525	copper-exporting ATPase	375	up
ORF_0530	extracellular protein	396	up
ORF_0550	transcription regulator	912	up
ORF_0551	DNA polymerase V subunit UmuC	1521	up
ORF_0554	DNA-3-methyladenine glycosylase I	645	up
ORF_0559	extracellular protein	663	up
ORF_0563	6-phospho-beta-glucosidase	1383	up
ORF_0564	cellobiose PTS, EIIC	1473	up
ORF_0574	rep protein	954	up
ORF_0581	GPH family glycoside-pentoside-hexuronide:cation symporter	1401	up
ORF_0616	lipoprotein	1011	up
ORF_0618	hypothetical protein	117	up
ORF_0630	transcription regulator	369	up
ORF_0631	integral membrane protein	369	up
ORF_0632	hypothetical protein	117	up
ORF_0634	possible transposase	180	up
ORF_0636	conserved hypothetical protein	258	up
ORF_0637	transposase	300	up
ORF_0638	conserved hypothetical protein	204	up
ORF_0659	transcription regulator	441	up
ORF_0665	PTS, EIIA	492	up
ORF_0677	metal uptake regulator	444	up
ORF_0682	conserved hypothetical protein	474	up
ORF_0690	putative pyruvate oxidase	1761	up
ORF_0703	negative regulator of proteolysis	423	up
ORF_0719	conserved hypothetical protein	1275	up
ORF_0720	phosphoribosylaminoimidazole carboxylase catalytic subunit	741	up
ORF_0721	conserved hypothetical protein	792	up
ORF_0722	conserved hypothetical protein	432	up
ORF_0741	small heat shock protein	423	up
ORF_0742	integral membrane protein	171	up
ORF_0743	integral membrane protein	201	up
ORF_0744	conserved hypothetical protein	444	up
ORF_0755	ABC transporter, permease protein	840	up
ORF_0756	ABC superfamily ATP binding cassette transporter, ABC protein	1701	up
ORF_0760	conserved hypothetical protein	330	up
ORF_0789	sucrose PTS, EIIBCA	1956	up
ORF_0835	homoserine O-succinyltransferase	876	up
ORF_0836	O-acetylhomoserine (thiol)-lyase	1287	up
ORF_0853	conserved hypothetical protein	744	up
ORF_0866	ABC transporter, ATP-binding and permease protein	399	up
ORF_0870	conserved hypothetical protein	132	up
ORF_0871	conserved hypothetical protein	144	up
ORF_0880	glycerol kinase	1518	up
ORF_0898	amino acid ABC transporter, permease protein	678	up
ORF_0900	GAF domain protein	480	up
ORF_0902	amino acid permease-associated region	1386	up
ORF_0903	Hin-like DNA-binding protein	288	up
ORF_0904	hypothetical protein	162	up
ORF_0905	hypothetical protein	129	up
ORF_0906	hypothetical protein	183	up
ORF_0907	hypothetical protein	198	up
ORF_0908	hypothetical protein	132	up
ORF_0909	conserved hypothetical protein	159	up
ORF_0921	multidrug transport protein	1197	up
ORF_0947	cell surface protein	7947	up
ORF_0966	conserved hypothetical protein	132	up
ORF_1002	conserved hypothetical protein	165	up
ORF_1014	conserved hypothetical protein	684	up
ORF_1015	thioredoxin	312	up
ORF_1017	conserved hypothetical protein	258	up
ORF_1049	conserved hypothetical protein	732	up
ORF_1050	Na(+)/H(+) antiporter	1197	up
ORF_1051	transport protein	1509	up
ORF_1055	transcription regulator	822	up
ORF_1057	arabinose transport protein	1401	up
ORF_1058	L-ribulokinase (putative)	1602	up
ORF_1059	L-ribulose-5-phosphate 4-epimerase	729	up
ORF_1065	galacitol PTS, EIIA	471	up
ORF_1066	galactitol PTS, EIIB	297	up
ORF_1067	galacitol PTS, EIIC	1272	up
ORF_1069	BglG family transcriptional antiterminator	1479	up
ORF_1070	PTS system, enzyme IIA component	432	up
ORF_1076	transketolase	1998	up
ORF_1080	sugar transport protein	1422	up
ORF_1082	maltose phosphorylase	2205	up
ORF_1084	beta-glucosides PTS, EIIBCA	2001	up
ORF_1092	putative fructose-like phosphotransferase system subunit EIIA	444	up
ORF_1093	putative PTS transporter components IIBC	1458	up
ORF_1112	conserved hypothetical protein	717	up
ORF_1117	transcription regulator	423	up
ORF_1119	integral membrane protein	270	up
ORF_1120	conserved hypothetical protein	411	up
ORF_1121	conserved hypothetical protein	429	up
ORF_1149	integral membrane protein	273	up
ORF_1152	AMT family ammonium or ammonia transporter	1263	up
ORF_1155	extracellular zinc metalloproteinase	564	up
ORF_1168	multidrug transport protein	1485	up
ORF_1169	conserved hypothetical protein	501	up
ORF_1182	hypothetical protein	174	up
ORF_1189	glycosyl transferase	993	up
ORF_1190	conserved hypothetical protein	1125	up
ORF_1246	extracellular protein	732	up
ORF_1255	transcription regulator	960	up
ORF_1276	amino acid transport protein	1383	up
ORF_1298	sugar ABC transporter, ATP-binding protein (putative)	1101	up
ORF_1299	ABC superfamily ATP binding cassette transporter, membrane protein	966	up
ORF_1300	sugar ABC superfamily ATP binding cassette transporter, membrane protein	843	up
ORF_1312	conserved hypothetical protein	117	up
ORF_1340	conserved hypothetical protein	126	up
ORF_1342	cation efflux protein (putative)	1392	up
ORF_1343	conserved hypothetical protein	246	up
ORF_1344	GNAT family acetyltransferase	447	up
ORF_1352	beta-glucosides PTS, EIIA	339	up
ORF_1370	conserved hypothetical protein	1170	up
ORF_1432	translation initiation factor IF-3	501	up
ORF_1433	ribosomal protein L35	195	up
ORF_1434	50S ribosomal protein L20	357	up
ORF_1435	conserved hypothetical protein	312	up
ORF_1460	conserved hypothetical protein	336	up
ORF_1461	ATPase involved in chromosome partitioning	810	up
ORF_1467	conserved hypothetical protein	282	up
ORF_1468	conserved hypothetical protein	213	up
ORF_1469	nicking enzyme (TraA)-like	2064	up
ORF_1470	conserved hypothetical protein	252	up
ORF_1479	Transposase	132	up
ORF_1480	glycosyl transferase, group 2 family	258	up
ORF_1485	conserved hypothetical protein	348	up
ORF_1486	conserved hypothetical protein	264	up
ORF_1512	NADPH-dependent FMN reductase	672	up
ORF_1515	conserved hypothetical protein	267	up
ORF_1532	conserved hypothetical protein	783	up
ORF_1559	conserved hypothetical protein	366	up
ORF_1560	conserved hypothetical protein	213	up
ORF_1576	multidrug transport protein	1203	up
ORF_1585	conserved hypothetical protein	408	up
ORF_1616	prophage Lp2 protein 2, integrase	1164	up
ORF_1617	transposase	186	up
ORF_1618	conserved hypothetical protein	141	up
ORF_1619	Transposase (orfB) of ISLsa2 (IS150 family)	417	up
ORF_1621	conserved hypothetical protein	618	up
ORF_1639	lipoprotein precursor, peptide binding protein OppA-like protein	1662	up
ORF_1670	topoisomerase-like	306	up
ORF_1698	hypothetical protein	132	up
ORF_1710	beta-lactamase (putative)	1131	up
ORF_1711	conserved hypothetical protein	876	up
ORF_1753	conserved hypothetical protein	393	up
ORF_1755	prophage Lp2 protein 58	384	up
ORF_1756	prophage Lp1 protein 59	297	up
ORF_1757	prophage Lp1 protein 58, lysin	1167	up
ORF_1758	conserved hypothetical protein	123	up
ORF_1761	prophage protein	363	up
ORF_1764	prophage protein	399	up
ORF_1767	prophage protein	552	up
ORF_1773	possible scaffold protein	678	up
ORF_1774	conserved hypothetical protein	207	up
ORF_1777	protein of hypothetical function DUF464	258	up
ORF_1779	PBSX family phage terminase	1239	up
ORF_1780	prophage Lp2 protein 34	528	up
ORF_1781	conserved hypothetical protein	270	up
ORF_1782	hypothetical protein	198	up
ORF_1790	prophage Lp2 protein 13	258	up
ORF_1791	prophage Lp2 protein 12	306	up
ORF_1792	putative uncharacterized protein	135	up
ORF_1793	prophage Lp1 protein 12	201	up
ORF_1796	conserved hypothetical protein	423	up
ORF_1797	prophage Lp1 protein 2	720	up
ORF_1803	ImpB/MucB/SamB family protein	1317	up
ORF_1804	conserved hypothetical protein	321	up
ORF_1805	conserved hypothetical protein	387	up
ORF_1806	Lactate dehydrogenase-like 2-hydroxyacid dehydrogenase	960	up
ORF_1807	putative LtrC	1125	up
ORF_1808	putative uncharacterized protein	216	up
ORF_1809	DNA topoisomerase	372	up
ORF_1812	hypothetical protein	204	up
ORF_1813	copy number control protein	801	up
ORF_1816	DNA-damage-inducible protein	282	up
ORF_1817	conserved hypothetical protein	507	up
ORF_1818	conserved hypothetical protein	279	up
ORF_1819	conserved hypothetical protein	210	up
ORF_1820	nickase	2061	up
ORF_1823	lactate oxidase	1101	up
ORF_1824	pyruvate oxidase	1749	up
ORF_1825	transcription regulator (putative)	426	up
ORF_1827	conserved hypothetical protein	411	up
ORF_1830	L-rhamnose isomerase	1284	up
ORF_1832	rhamnulokinase	1467	up
ORF_1833	MFS family rhamnose tranport protein	1329	up
ORF_1836	galactitol PTS, EIIA	462	up
ORF_1849	mannose-6-phosphate isomerase	1344	up
ORF_1862	alpha-mannosidase (putative)	2700	up
ORF_1863	conserved hypothetical protein	1290	up
ORF_1864	transcription regulator	1065	up
ORF_1865	alpha-1,2-mannosidase (putative)	2148	up
ORF_1876	putative uncharacterized protein lp_3645	1851	up
ORF_1877	AraC family transcriptional regulator	834	up
ORF_1883	PTS system, IIC component	1239	up
ORF_1884	cellobiose-specific PTS system IIB component	312	up
ORF_1895	RecName: Full=Putative xylose-proton symporter; AltName: Full=Xylose transporter >gi|3688059|gb|AAC62250.1| isoprimeverose cation-symporter XylP	1440	up
ORF_1902	transposase	309	up
ORF_1906	conserved hypothetical protein	1953	up
ORF_1907	conserved hypothetical protein	1197	up
ORF_1936	prophage Lp1 protein 66, lipoprotein precursor	669	up
ORF_1937	prophage Lp1 protein 65	978	up
ORF_1942	possible alpha/beta hydrolase	888	up
ORF_1977	bacteriocin activator	156	up
ORF_1992	phosphoribosyl-ATP pyrophosphatase	132	up
ORF_2000	hypothetical protein	120	up
ORF_2099	30S ribosomal protein S3	654	up
ORF_2102	50S ribosomal protein L2	840	up
ORF_2104	50S ribosomal protein L4	624	up
ORF_2110	type 4 prepilin-like proteins leader peptide processing enzyme (putative)	408	up
ORF_2116	conserved hypothetical protein	129	up
ORF_2134	conserved hypothetical protein	465	up
ORF_2138	lipoprotein precursor	1143	up
ORF_2140	conserved hypothetical protein	717	up
ORF_2173	NMT1/THI5 like protein	1053	up
ORF_2179	conserved hypothetical protein	195	up
ORF_2182	Transposase	264	up
ORF_2183	conserved hypothetical protein	168	up
ORF_2188	phosphoribosyl-ATP pyrophosphatase	321	up
ORF_2193	imidazoleglycerol-phosphate dehydratase	585	up
ORF_2195	ATP phosphoribosyltransferase	657	up
ORF_2196	histidine--tRNA ligase (putative)	1152	up
ORF_2240	pyruvate oxidase	1758	up
ORF_2242	thioredoxin H-type	321	up
ORF_2256	conserved hypothetical protein	915	up
ORF_2280	aromatic amino acid specific aminotransferase	1173	up
ORF_2281	dihydrodipicolinate synthase	870	up
ORF_2304	diguanylate cyclase/phosphodiesterase domain-containing protein	654	up
ORF_2305	diguanylate cyclase/phosphodiesterase domain-containing protein	129	up
ORF_2306	conserved hypothetical protein	519	up
ORF_2307	glycosyltransferase (putative)	1329	up
ORF_2397	L-serine ammonia-lyase beta subunit	654	up
ORF_2398	serine transporter	1281	up
ORF_2399	serine--tRNA ligase	1272	up
ORF_2400	conserved hypothetical protein	120	up
ORF_2401	CTP synthetase	1614	up
ORF_2408	conserved hypothetical protein	123	up
ORF_2443	cellobiose PTS, EIIC	1359	up
ORF_2450	ATP-dependent DNA helicase	2310	up
ORF_2458	bacteriocin ABC-transporter, ATP-binding and permease protein PlnG	2151	up
ORF_2469	bacteriocin precursor peptide PlnJ (putative)	168	up
ORF_2517	ribonucleoside-diphosphate reductase	2169	up
ORF_2518	ribonucleoside-diphosphate reductase beta subunit	927	up
ORF_2519	ribonucleoside-diphosphate reductase beta subunit	951	up
ORF_2540	transposase, fragment	213	up
ORF_2554	conserved hypothetical protein	129	up
ORF_2555	conserved hypothetical protein	120	up
ORF_2556	transport protein	723	up
ORF_2581	amino acid ABC transporter, substrate binding protein	816	up
ORF_2594	nucleoside-diphosphate-sugar epimerase	852	up
ORF_2616	effector of murein hydrolase (putative)	420	up
ORF_2617	effector of murein hydrolase (putative)	729	up
ORF_2635	amino acid permease	1425	up
ORF_2656	conserved hypothetical protein	153	up
ORF_2663	putative polyketide synthase	2778	up
ORF_2670	transcriptional activator	2529	up
ORF_2671	resolvase	174	up
ORF_2672	conserved hypothetical protein	288	up
ORF_2688	30S ribosomal protein S2	804	up
ORF_2699	conserved hypothetical protein	477	up
ORF_2700	transcription elongation factor NusA	1218	up
ORF_2710	shikimate kinase	522	up
ORF_2714	heat-inducible transcription repressor	1044	up
ORF_2715	co-chaperone GrpE	609	up
ORF_2716	molecular chaperone DnaK	1869	up
ORF_2727	DNA-3-methyladenine glycosylase	630	up
ORF_2753	DNA primase DnaG	1881	up
ORF_2754	RNA polymerase sigma factor RpoD	1107	up
ORF_2755	conserved hypothetical protein	129	up
ORF_2800	ABC transporter, ATP-binding protein	942	up
ORF_2806	chaperone protein ClpB	2604	up
ORF_2862	peptide-methionine (R)-S-oxide reductase	435	up
ORF_2864	conserved hypothetical protein	201	up
ORF_2866	integral membrane protein	1527	up
ORF_2867	glycosyltransferase (putative)	1305	up
ORF_2901	chloramphenicol O-acetyltransferase	669	up
ORF_2902	conserved hypothetical protein	120	up
ORF_2920	microcin immunity protein	969	up
ORF_2938	amino acid ABC transporter, substrate binding protein	858	up
ORF_2939	amino acid ABC transporter, permease protein	672	up
ORF_2940	amino acid ABC transporter, ATP-binding protein	1068	up
ORF_2953	conserved hypothetical protein	144	up
ORF_2984	conserved hypothetical protein	138	up
ORF_2985	conserved hypothetical protein	432	up
ORF_2987	transport protein	1704	up
ORF_2993	phosphopantetheinyltransferase	552	up
ORF_2994	enoyl-(acyl carrier protein) reductase	759	up
ORF_2995	acetyl-CoA carboxylase, carboxyl transferase subunit alpha	771	up
ORF_2996	acetyl-CoA carboxylase, carboxyl transferase subunit beta	843	up
ORF_2997	acetyl-CoA carboxylase, biotin carboxylase subunit	1389	up
ORF_2998	(3R)-hydroxymyristoyl-(acyl carrier protein) dehydratase	414	up
ORF_2999	acetyl-CoA carboxylase, biotin carboxyl carrier protein	462	up
ORF_3000	3-oxoacyl-(acyl-carrier protein) synthase II	1233	up
ORF_3001	3-oxoacyl-	723	up
ORF_3002	(acyl-carrier protein) S-malonyltransferase	933	up
ORF_3041	DNA helicase RecG	2040	up
ORF_3089	conserved hypothetical protein	414	up
ORF_3114	conserved hypothetical protein	273	up
ORF_3115	transposase	678	up
ORF_3116	transposase	315	up
ORF_3143	putative transposase	237	up
ORF_3144	conserved hypothetical protein	114	up
ORF_3149	conserved hypothetical protein	2763	up
ORF_3150	conserved hypothetical protein	1977	up
ORF_3151	transcription regulator (putative)	486	up
ORF_0052	conserved hypothetical protein	198	down
ORF_0054	phosphoenolpyruvate--protein phosphatase	1731	down
ORF_0059	aromatic amino acid aminotransferase	1188	down
ORF_0072	permease	1836	down
ORF_0114	glycosyl hydrolase	2721	down
ORF_0115	conserved hypothetical protein	450	down
ORF_0234	transport protein	822	down
ORF_0313	stress induced DNA binding protein	468	down
ORF_0407	N-acetylglucosamine PTS, EIICBA	1983	down
ORF_0433	peptide deformylase	411	down
ORF_0471	maltose O-acetyltransferase	570	down
ORF_0477	transcription regulator	879	down
ORF_0478	conserved hypothetical protein	372	down
ORF_0492	transcription regulator	435	down
ORF_0493	conserved hypothetical protein	399	down
ORF_0494	carboxymuconolactone decarboxylase	321	down
ORF_0495	short-chain dehydrogenase/oxidoreductase	744	down
ORF_0503	asparagine synthase (glutamine-hydrolysing)	1902	down
ORF_0523	transcription regulator	762	down
ORF_0524	cell surface protein precursor	4074	down
ORF_0535	short chain dehydrogenase/reductase family oxidoreductase	891	down
ORF_0561	transcription regulator	444	down
ORF_0580	UDP-N-acetylmuramoylalanyl-D-glutamate--2,6-diami nopimelate ligase	1482	down
ORF_0585	possible histone acetyltransferase	570	down
ORF_0619	alkaline shock protein	441	down
ORF_0620	alkaline shock protein	423	down
ORF_0621	conserved hypothetical protein	183	down
ORF_0622	conserved hypothetical protein	546	down
ORF_0623	integral membrane protein	255	down
ORF_0641	conserved hypothetical protein	153	down
ORF_0642	bifunctional GMP synthase/glutamine amidotransferase protein	1557	down
ORF_0655	transport protein	558	down
ORF_0698	polyphosphate kinase	2157	down
ORF_0701	integral membrane protein	462	down
ORF_0704	conserved hypothetical protein	783	down
ORF_0705	glycerol kinase	1527	down
ORF_0725	oxidoreductase	978	down
ORF_0737	purine nucleoside phosphorylase (putative)	759	down
ORF_0805	undecaprenyl-diphosphatase	828	down
ORF_0807	transcription regulator (putative)	573	down
ORF_0808	integral membrane protein (putative)	324	down
ORF_0818	glutamate decarboxylase	1410	down
ORF_0828	conserved hypothetical protein	696	down
ORF_0832	ABC transporter, permease protein (putative)	909	down
ORF_0833	ABC superfamily ATP binding cassette transporter, binding protein	1008	down
ORF_0877	glycine betaine/carnitine/choline ABC transporter, substrate binding and permease protein	1527	down
ORF_0890	conserved hypothetical protein	564	down
ORF_0928	integral membrane protein	537	down
ORF_0935	RNA polymerase factor sigma-54	1338	down
ORF_0938	phosphoglycerate kinase	1203	down
ORF_0939	triosephosphate isomerase	759	down
ORF_0940	phosphopyruvate hydratase	1329	down
ORF_0963	protein of hypothetical function DUF147	843	down
ORF_0965	phosphoglucosamine mutase	1356	down
ORF_0987	amino acid transport protein	1386	down
ORF_1011	phosphoesterase (putative)	519	down
ORF_1012	xanthosine triphosphate pyrophosphatase	609	down
ORF_1037	accessory gene regulator protein C	1263	down
ORF_1040	catalase	1455	down
ORF_1041	integral membrane protein	246	down
ORF_1045	oxidoreductase	1206	down
ORF_1078	choloylglycine hydrolase	975	down
ORF_1134	acetaldehyde dehydrogenase	1368	down
ORF_1140	dipeptidase	1413	down
ORF_1142	integral membrane protein	564	down
ORF_1143	biotin-(acetyl-CoA-carboxylase)ligase and biotin operon repressor	972	down
ORF_1146	conserved hypothetical protein	1167	down
ORF_1156	ribose 5-phosphate epimerase	669	down
ORF_1173	poly(glycerol-phosphate) alpha-glucosyltransferase	1509	down
ORF_1174	poly(glycerol-phosphate) alpha-glucosyltransferase	1545	down
ORF_1211	conserved hypothetical protein	648	down
ORF_1215	Mg2+ and Co2+ transport protein	960	down
ORF_1225	cell division protein FtsA	1347	down
ORF_1226	cell division protein FtsZ	1284	down
ORF_1227	cell division protein (putative)	423	down
ORF_1228	YlmG protein	270	down
ORF_1229	cell division protein (putative)	786	down
ORF_1269	adenine phosphoribosyltransferase	543	down
ORF_1270	integral membrane protein	1074	down
ORF_1279	integral membrane protein	720	down
ORF_1292	leucyl-tRNA synthetase	2427	down
ORF_1303	deoxyguanosine kinase	648	down
ORF_1304	large-conductance mechanosensitive channel	381	down
ORF_1349	conserved hypothetical protein	657	down
ORF_1374	oxidoreductase (putative)	615	down
ORF_1438	transcription regulator (putative)	348	down
ORF_1452	lipoprotein precursor	585	down
ORF_1453	cation transport protein	963	down
ORF_1521	serine O-acetyltransferase	543	down
ORF_1522	cystathionine beta-lyase	1146	down
ORF_1523	cysteine synthase	912	down
ORF_1524	methionyl aminopeptidase	792	down
ORF_1590	exopolysaccharide biosynthesis protein	759	down
ORF_1702	conserved hypothetical protein	627	down
ORF_1708	integral membrane protein	285	down
ORF_1716	L-2-hydroxyisocaproate dehydrogenase	918	down
ORF_1726	UDP-N-acetylglucosamine 1-carboxyvinyltransferase	1317	down
ORF_1869	histidine protein kinase; sensor protein	1713	down
ORF_1870	integral membrane protein	612	down
ORF_1930	16S RNA methylase	609	down
ORF_1935	Lysyl-tRNA synthetase (class II)	2604	down
ORF_1951	glutamyl-tRNA synthetase	1491	down
ORF_1956	acetyltransferase (putative)	297	down
ORF_1957	ribose-5-phosphate isomerase A	684	down
ORF_1966	acetyl-CoA carboxylase, biotin carboxylase subunit	1323	down
ORF_1967	acetyl-CoA carboxylase, biotin carboxyl carrier protein	402	down
ORF_1990	glutamate dehydrogenase	1347	down
ORF_1993	conserved hypothetical protein	441	down
ORF_2021	oxidoreductase (putative)	975	down
ORF_2066	DegV family protein	870	down
ORF_2175	potassium uptake protein	1980	down
ORF_2177	alanine racemase	1128	down
ORF_2178	holo-	363	down
ORF_2200	conserved hypothetical protein	348	down
ORF_2204	aspartate-semialdehyde dehydrogenase	1062	down
ORF_2219	ribonuclease H (putative)	897	down
ORF_2223	oxidoreductase	978	down
ORF_2224	conserved hypothetical protein	114	down
ORF_2225	oxidoreductase	1020	down
ORF_2229	pyrazinamidase/nicotinamidase	555	down
ORF_2257	transcription regulator	321	down
ORF_2272	conserved hypothetical protein	486	down
ORF_2282	conserved hypothetical protein	135	down
ORF_2300	xanthine permease	1341	down
ORF_2316	purine biosynthesis cluster protein	255	down
ORF_2317	phosphoribosylaminoimidazole-succinocarboxamide synthase	732	down
ORF_2331	ABC transporter, ATP-binding protein	879	down
ORF_2354	nicotinate phosphoribosyltransferase	1434	down
ORF_2378	amino acid transport protein	1437	down
ORF_2390	conserved hypothetical protein	1137	down
ORF_2425	conserved hypothetical protein	540	down
ORF_2486	conserved hypothetical protein	180	down
ORF_2489	adenine deaminase	1692	down
ORF_2565	guanosine 5'-monophosphate oxidoreductase	1152	down
ORF_2573	nucleoside transport protein	1284	down
ORF_2577	aminotransferase	1227	down
ORF_2611	ferric uptake regulator	483	down
ORF_2615	acetyltransferase (putative)	552	down
ORF_2620	zinc-dependent proteinase (putative)	699	down
ORF_2621	conserved hypothetical protein	129	down
ORF_2622	squalene synthase	1497	down
ORF_2623	phytoene synthase	882	down
ORF_2624	hypothetical protein	117	down
ORF_2627	glutathione reductase	1335	down
ORF_2633	cardiolipin synthetase 2	1449	down
ORF_2636	potassium uptake protein	2043	down
ORF_2686	D-lactate dehydrogenase	999	down
ORF_2721	D-alanyl transfer protein DltB	1215	down
ORF_2722	D-alanine--poly(phosphoribitol) ligase subunit 2	237	down
ORF_2723	D-alanyl transfer protein DltD	1278	down
ORF_2736	histidyl-tRNA synthetase	1281	down
ORF_2765	conserved hypothetical protein	150	down
ORF_2782	conserved hypothetical protein	390	down
ORF_2852	tRNA:M(5)U-54 methyltransferase	1326	down
ORF_2926	lipase/esterase (putative)	753	down
ORF_2937	conserved hypothetical protein	501	down
ORF_2969	conserved hypothetical protein	222	down
ORF_2970	conserved hypothetical protein	114	down
ORF_2971	integral membrane protein	267	down
ORF_2972	conserved hypothetical protein	120	down
ORF_2973	integral membrane protein	249	down
ORF_2974	conserved hypothetical protein	897	down
ORF_2975	integral membrane protein	366	down
ORF_2976	conserved hypothetical protein	459	down
ORF_2977	sensory protein	486	down
ORF_3058	glycine betaine/carnitine/choline ABC transporter, ATP-binding protein	654	down
ORF_3059	glycine betaine/carnitine/choline ABC transporter, substrate binding protein	936	down
ORF_3060	glycine betaine/carnitine/choline ABC transporter, permease protein	630	down
ORF_3061	ABC superfamily ATP binding cassette transporter, ABC protein	1185	down
ORF_3096	integral membrane protein	2646	down
ORF_3119	succinate-semialdehyde dehydrogenase (NAD(P)+)	591	down
ORF_3126	conserved hypothetical protein	204	down

## Sheet: PC48h_PC36h
Gene	Product	Length
ORF_0043	hypothetical protein	150	up
ORF_0106	1,4-alpha-glucan branching enzyme	1905	up
ORF_0128	P-nitrobenzoate reductase	651	up
ORF_0175	Na+/H+ antiporter NhaC	1425	up
ORF_0189	conserved hypothetical protein	144	up
ORF_0196	copper transporting ATPase	2040	up
ORF_0208	conserved hypothetical protein	471	up
ORF_0270	beta-galactosidase, small subunit	960	up
ORF_0286	branched-chain amino acid transport protein	540	up
ORF_0338	conserved hypothetical protein	210	up
ORF_0394	branched-chain amino acid ABC transporter, substrate binding protein	1194	up
ORF_0395	branched-chain amino acid ABC transporter, permease protein	879	up
ORF_0423	integral membrane protein	972	up
ORF_0428	melibiose operon regulatory protein	162	up
ORF_0499	conserved hypothetical protein	186	up
ORF_0525	copper-exporting ATPase	375	up
ORF_0526	copper-exporting ATPase	270	up
ORF_0530	extracellular protein	396	up
ORF_0554	DNA-3-methyladenine glycosylase I	645	up
ORF_0559	extracellular protein	663	up
ORF_0599	acyl carrier protein phosphodiesterase	630	up
ORF_0604	transcription regulator	291	up
ORF_0605	conserved hypothetical protein	708	up
ORF_0606	conserved hypothetical protein	495	up
ORF_0659	transcription regulator	441	up
ORF_0719	conserved hypothetical protein	1275	up
ORF_0794	Na+/H+ antiporter NhaC	1401	up
ORF_0880	glycerol kinase	1518	up
ORF_0881	glycerol-3-phosphate dehydrogenase	1830	up
ORF_1066	galactitol PTS, EIIB	297	up
ORF_1070	PTS system, enzyme IIA component	432	up
ORF_1298	sugar ABC transporter, ATP-binding protein (putative)	1101	up
ORF_1299	ABC superfamily ATP binding cassette transporter, membrane protein	966	up
ORF_1300	sugar ABC superfamily ATP binding cassette transporter, membrane protein	843	up
ORF_1435	conserved hypothetical protein	312	up
ORF_1458	hypothetical protein	228	up
ORF_1459	hypothetical protein	204	up
ORF_1460	conserved hypothetical protein	336	up
ORF_1461	ATPase involved in chromosome partitioning	810	up
ORF_1517	dihydroorotase	1119	up
ORF_1518	L-seryl-tRNA(Sec) selenium transferase (putative)	1101	up
ORF_1587	glutamine ABC superfamily ATP binding cassette transporter, substrate binding and permease protein	1476	up
ORF_1641	phosphoglycerate dehydrogenase	1179	up
ORF_1767	prophage protein	552	up
ORF_1778	SPP1 family phage portal protein	1509	up
ORF_1780	prophage Lp2 protein 34	528	up
ORF_1830	L-rhamnose isomerase	1284	up
ORF_1831	conserved hypothetical protein	315	up
ORF_1833	MFS family rhamnose tranport protein	1329	up
ORF_1895	RecName: Full=Putative xylose-proton symporter; AltName: Full=Xylose transporter >gi|3688059|gb|AAC62250.1| isoprimeverose cation-symporter XylP	1440	up
ORF_1977	bacteriocin activator	156	up
ORF_2000	hypothetical protein	120	up
ORF_2053	manganese ABC transporter, ATP-binding protein	738	up
ORF_2065	conserved hypothetical protein	1089	up
ORF_2110	type 4 prepilin-like proteins leader peptide processing enzyme (putative)	408	up
ORF_2144	conserved hypothetical protein	126	up
ORF_2167	bifunctional ornithine acetyltransferase/N-acetylglutamate synthase protein	1209	up
ORF_2169	carbamoyl phosphate synthase small subunit	1068	up
ORF_2170	carbamoyl-phosphate synthase, large subunit	3063	up
ORF_2193	imidazoleglycerol-phosphate dehydratase	585	up
ORF_2195	ATP phosphoribosyltransferase	657	up
ORF_2196	histidine--tRNA ligase (putative)	1152	up
ORF_2240	pyruvate oxidase	1758	up
ORF_2246	conserved hypothetical protein	507	up
ORF_2397	L-serine ammonia-lyase beta subunit	654	up
ORF_2399	serine--tRNA ligase	1272	up
ORF_2469	bacteriocin precursor peptide PlnJ (putative)	168	up
ORF_2470	plantaricin JK family bacteriocin	174	up
ORF_2512	conserved hypothetical protein	129	up
ORF_2554	conserved hypothetical protein	129	up
ORF_2584	integral membrane protein (putative)	639	up
ORF_2608	conserved hypothetical protein	180	up
ORF_2635	amino acid permease	1425	up
ORF_2710	shikimate kinase	522	up
ORF_2774	conserved hypothetical protein	435	up
ORF_2862	peptide-methionine (R)-S-oxide reductase	435	up
ORF_2864	conserved hypothetical protein	201	up
ORF_2865	conserved hypothetical protein	855	up
ORF_2920	microcin immunity protein	969	up
ORF_2936	hypothetical protein	114	up
ORF_2938	amino acid ABC transporter, substrate binding protein	858	up
ORF_2939	amino acid ABC transporter, permease protein	672	up
ORF_2940	amino acid ABC transporter, ATP-binding protein	1068	up
ORF_2953	conserved hypothetical protein	144	up
ORF_3020	anthranilate synthase, component II	576	up
ORF_3124	thioredoxin	321	up
ORF_0671	conserved hypothetical protein	252	down
ORF_2300	xanthine permease	1341	down
ORF_2316	purine biosynthesis cluster protein	255	down
ORF_2414	purine operon repressor	837	down
ORF_2629	adenylosuccinate lyase	1299	down
ORF_2993	phosphopantetheinyltransferase	552	down
ORF_2994	enoyl-(acyl carrier protein) reductase	759	down
ORF_2995	acetyl-CoA carboxylase, carboxyl transferase subunit alpha	771	down
ORF_2996	acetyl-CoA carboxylase, carboxyl transferase subunit beta	843	down
ORF_2997	acetyl-CoA carboxylase, biotin carboxylase subunit	1389	down
ORF_2998	(3R)-hydroxymyristoyl-(acyl carrier protein) dehydratase	414	down
ORF_2999	acetyl-CoA carboxylase, biotin carboxyl carrier protein	462	down
ORF_3000	3-oxoacyl-(acyl-carrier protein) synthase II	1233	down
ORF_3001	3-oxoacyl-	723	down
ORF_3002	(acyl-carrier protein) S-malonyltransferase	933	down
ORF_3003	acyl carrier protein	249	down

## Sheet: PC60h_PC48h
Gene	Product	Length
ORF_3124	thioredoxin	321	up
ORF_3125	conserved hypothetical protein	270	up
ORF_1621	conserved hypothetical protein	618	down
ORF_2470	plantaricin JK family bacteriocin	174	down

## Sheet: FS36h_FS24h
Gene	Product	Length
ORF_0001	transporter, major facilitator family protein	1392	up
ORF_0006	conserved hypothetical protein	816	up
ORF_0008	conserved hypothetical protein	126	up
ORF_0009	conserved hypothetical protein	792	up
ORF_0034	glutathione reductase	1323	up
ORF_0115	conserved hypothetical protein	450	up
ORF_0160	conserved hypothetical protein	168	up
ORF_0168	extracellular protein	573	up
ORF_0169	extracellular protein	693	up
ORF_0174	conserved hypothetical protein	306	up
ORF_0175	Na+/H+ antiporter NhaC	1425	up
ORF_0176	D-serine/D-alanine/glycine:H+ symporter	1383	up
ORF_0187	small heat shock protein	444	up
ORF_0188	conserved hypothetical protein	339	up
ORF_0227	cation transporting P-type ATPase	2676	up
ORF_0283	transcription regulator of beta-galactosidase gene	1011	up
ORF_0284	beta-galactosidase I	2052	up
ORF_0285	lactose transport protein	1947	up
ORF_0286	branched-chain amino acid transport protein	540	up
ORF_0287	branched-chain amino acid transport protein	303	up
ORF_0304	transcription regulator	663	up
ORF_0305	GTP-binding protein LepA	1788	up
ORF_0306	conserved hypothetical protein	162	up
ORF_0313	stress induced DNA binding protein	468	up
ORF_0334	conserved hypothetical protein	669	up
ORF_0338	conserved hypothetical protein	210	up
ORF_0341	conserved hypothetical protein	141	up
ORF_0342	hypothetical protein	171	up
ORF_0343	hypothetical protein	168	up
ORF_0344	conserved hypothetical protein	252	up
ORF_0345	conserved hypothetical protein	480	up
ORF_0346	Helicase-like protein:Type III restriction enzyme, res subunit:DEAD/DEAH box helicase-like protein	1260	up
ORF_0347	phage NTP-binding protein	717	up
ORF_0348	conserved hypothetical protein	600	up
ORF_0349	conserved hypothetical protein	555	up
ORF_0350	prophage Lp3 protein 7	795	up
ORF_0351	prophage Lp3 protein 8, helicase	1275	up
ORF_0352	phage protein	333	up
ORF_0353	conserved hypothetical protein	225	up
ORF_0354	prophage Lp1 protein 30	357	up
ORF_0359	hypothetical protein	171	up
ORF_0360	conserved hypothetical protein	216	up
ORF_0361	hypothetical protein	228	up
ORF_0362	putative uncharacterized protein	243	up
ORF_0363	terminase	1680	up
ORF_0364	phage portal protein, HK97 family	1143	up
ORF_0365	Clp protease domain protein	753	up
ORF_0366	major head protein Cps	1179	up
ORF_0367	putative uncharacterized protein	306	up
ORF_0369	gp9 protein	408	up
ORF_0370	gp10 protein	423	up
ORF_0371	putative major tail protein	612	up
ORF_0372	putative uncharacterized protein	315	up
ORF_0373	hypothetical protein	222	up
ORF_0374	phage tail tape measure protein	4545	up
ORF_0375	putative uncharacterized protein	822	up
ORF_0387	conserved hypothetical protein	432	up
ORF_0388	manganese transport protein	1593	up
ORF_0397	branched-chain amino acid ABC transporter, ATP-binding protein	780	up
ORF_0398	branched-chain amino acid ABC transporter, ATP-binding protein	705	up
ORF_0399	CBS domain protein	636	up
ORF_0419	possible toxin regulator	1095	up
ORF_0440	conserved hypothetical protein	243	up
ORF_0517	cell surface protein precursor	1065	up
ORF_0535	short chain dehydrogenase/reductase family oxidoreductase	891	up
ORF_0537	extracellular zinc metalloproteinase	1128	up
ORF_0613	hypothetical protein	132	up
ORF_0614	conserved hypothetical protein	573	up
ORF_0615	conserved hypothetical protein	333	up
ORF_0619	alkaline shock protein	441	up
ORF_0620	alkaline shock protein	423	up
ORF_0621	conserved hypothetical protein	183	up
ORF_0622	conserved hypothetical protein	546	up
ORF_0623	integral membrane protein	255	up
ORF_0671	conserved hypothetical protein	252	up
ORF_0706	hypothetical protein	135	up
ORF_0720	phosphoribosylaminoimidazole carboxylase catalytic subunit	741	up
ORF_0727	phosphomethylpyrimidine kinase	825	up
ORF_0728	thiamine-phosphate diphosphorylase	654	up
ORF_0731	conserved hypothetical protein	1593	up
ORF_0740	transcription regulator (putative)	474	up
ORF_0741	small heat shock protein	423	up
ORF_0744	conserved hypothetical protein	444	up
ORF_0751	conserved hypothetical protein	1695	up
ORF_0762	conserved hypothetical protein	813	up
ORF_0793	oxidoreductase	915	up
ORF_0794	Na+/H+ antiporter NhaC	1401	up
ORF_0835	homoserine O-succinyltransferase	876	up
ORF_0836	O-acetylhomoserine (thiol)-lyase	1287	up
ORF_0837	homoserine dehydrogenase	1281	up
ORF_0871	conserved hypothetical protein	144	up
ORF_0880	glycerol kinase	1518	up
ORF_0881	glycerol-3-phosphate dehydrogenase	1830	up
ORF_0882	glycerol uptake facilitator protein	720	up
ORF_0891	HD domain protein	198	up
ORF_0892	S-adenosyl-L-homocysteine hydrolase, NAD binding domain protein	1155	up
ORF_0893	transcription regulator	156	up
ORF_0894	transcription regulator	165	up
ORF_0895	acetoin(diacetyl)reductase	771	up
ORF_0896	S-ribosylhomocysteinase	474	up
ORF_0897	conserved hypothetical protein	861	up
ORF_0898	amino acid ABC transporter, permease protein	678	up
ORF_0899	ABC superfamily ATP binding cassette transporter, binding protein	1077	up
ORF_0900	GAF domain protein	480	up
ORF_0903	Hin-like DNA-binding protein	288	up
ORF_0904	hypothetical protein	162	up
ORF_0905	hypothetical protein	129	up
ORF_0947	cell surface protein	7947	up
ORF_1035	ATP-dependent Clp protease, ATP-binding subunit ClpL	1626	up
ORF_1041	integral membrane protein	246	up
ORF_1042	conserved hypothetical protein	135	up
ORF_1074	ribulose-phosphate 3-epimerase	693	up
ORF_1075	transaldolase	654	up
ORF_1076	transketolase	1998	up
ORF_1077	HAD superfamily hydrolase	819	up
ORF_1114	integral membrane protein	366	up
ORF_1120	conserved hypothetical protein	411	up
ORF_1149	integral membrane protein	273	up
ORF_1152	AMT family ammonium or ammonia transporter	1263	up
ORF_1153	L-2-hydroxyisocaproate dehydrogenase	960	up
ORF_1154	integral membrane protein	270	up
ORF_1270	integral membrane protein	1074	up
ORF_1283	hypothetical protein	1287	up
ORF_1284	hypothetical protein	405	up
ORF_1332	bifunctional homocysteine S-methyltransferase/5,10-methylenetetrahydrofolate reductase protein	1857	up
ORF_1333	5-methyltetrahydropteroyltriglutamate--homocysteine S-methyltransferase	2307	up
ORF_1397	extracellular protein	3279	up
ORF_1400	extracellular protein	681	up
ORF_1401	extracellular protein	288	up
ORF_1452	lipoprotein precursor	585	up
ORF_1469	nicking enzyme (TraA)-like	2064	up
ORF_1506	conserved hypothetical protein	552	up
ORF_1529	alpha, alpha-phosphotrehalase	1644	up
ORF_1530	beta-glucosides PTS, EIIABC	1998	up
ORF_1626	ABC transporter, permease protein (putative)	1068	up
ORF_1627	ABC transporter, ATP-binding protein	681	up
ORF_1634	aspartate ammonia-lyase	1401	up
ORF_1639	lipoprotein precursor, peptide binding protein OppA-like protein	1662	up
ORF_1649	exopolysaccharide biosynthesis protein	774	up
ORF_1717	amino acid ABC transporter, substrate binding protein	825	up
ORF_1735	uracil transport protein	1281	up
ORF_1807	putative LtrC	1125	up
ORF_1808	putative uncharacterized protein	216	up
ORF_1809	DNA topoisomerase	372	up
ORF_1812	hypothetical protein	204	up
ORF_1813	copy number control protein	801	up
ORF_1830	L-rhamnose isomerase	1284	up
ORF_1840	Phosphotransferase system IIA component	489	up
ORF_1841	hypothetical protein	372	up
ORF_1842	conserved hypothetical protein	582	up
ORF_1843	transcription regulator	777	up
ORF_1846	beta-phosphoglucomutase	681	up
ORF_1847	conserved hypothetical protein	498	up
ORF_1848	N-acetylglucosamine and glucose PTS, EIICBA	1869	up
ORF_1849	mannose-6-phosphate isomerase	1344	up
ORF_1850	hypothetical protein	123	up
ORF_1851	6-phospho-beta-glucosidase	1458	up
ORF_1859	alpha-glucosidase	1677	up
ORF_1862	alpha-mannosidase (putative)	2700	up
ORF_1868	response regulator	1473	up
ORF_1869	histidine protein kinase; sensor protein	1713	up
ORF_1877	AraC family transcriptional regulator	834	up
ORF_1878	ABC transporter, ATP-binding and permease protein	1758	up
ORF_1879	ABC transporter, ATP-binding and permease protein	1791	up
ORF_1883	PTS system, IIC component	1239	up
ORF_1896	bifunctional acetaldehyde-CoA/alcohol dehydrogenase	2604	up
ORF_1900	2-oxo-hept-3-ene-1,7-dioate hydratase; 2-oxo-hept-4-ene-1,7-dioate hydratase	801	up
ORF_1901	acetyltransferase (putative)	483	up
ORF_1902	transposase	309	up
ORF_1971	transcription regulator	2850	up
ORF_1976	conserved hypothetical protein	819	up
ORF_1977	bacteriocin activator	156	up
ORF_1978	DNA methylase N-4/N-6	198	up
ORF_1997	universal stress protein UspA family nucleotide-binding protein	441	up
ORF_2028	cytochrome D ubiquinol oxidase, subunit II	996	up
ORF_2056	tartrate dehydratase subunit alpha	933	up
ORF_2058	conserved hypothetical protein	327	up
ORF_2059	cation transport protein	1422	up
ORF_2060	3-dehydroquinate synthase	1080	up
ORF_2061	3-deoxy-7-phosphoheptulonate synthase	996	up
ORF_2062	shikimate 5-dehydrogenase	894	up
ORF_2063	transketolase	2013	up
ORF_2161	proline-specific peptidase	906	up
ORF_2162	oligopeptide ABC superfamily ATP binding cassette transporter substrate binding protein	1626	up
ORF_2164	ornithine carbamoyltransferase	1023	up
ORF_2165	acetylornithine aminotransferase	1170	up
ORF_2166	acetylglutamate kinase	747	up
ORF_2167	bifunctional ornithine acetyltransferase/N-acetylglutamate synthase protein	1209	up
ORF_2168	N-acetyl-gamma-glutamyl-phosphate reductase	1026	up
ORF_2169	carbamoyl phosphate synthase small subunit	1068	up
ORF_2170	carbamoyl-phosphate synthase, large subunit	3063	up
ORF_2171	ABC superfamily ATP binding cassette transporter, ABC protein	771	up
ORF_2172	Putative aliphatic sulfonates transport permease protein ssuC	1014	up
ORF_2173	NMT1/THI5 like protein	1053	up
ORF_2243	cystathionine gamma-synthase	1122	up
ORF_2245	conserved hypothetical protein	663	up
ORF_2256	conserved hypothetical protein	915	up
ORF_2258	BetT protein	198	up
ORF_2259	glycosyltransferase (putative)	1176	up
ORF_2267	conserved hypothetical protein	525	up
ORF_2291	orotate phosphoribosyltransferase	639	up
ORF_2292	orotidine-5'-phosphate decarboxylase	714	up
ORF_2293	dihydroorotate dehydrogenase 1B	918	up
ORF_2294	carbamoyl-phosphate synthase (glutamine-hydrolyzing), large subunit	3177	up
ORF_2295	carbamoyl-phosphate synthase (glutamine-hydrolyzing)	1095	up
ORF_2296	dihydroorotase	1293	up
ORF_2297	aspartate carbamoyltransferase catalytic subunit	936	up
ORF_2300	xanthine permease	1341	up
ORF_2311	phosphoribosylglycinamide formyltransferase	579	up
ORF_2313	amidophosphoribosyltransferase	1455	up
ORF_2314	phosphoribosylformylglycinamidine synthase II	2220	up
ORF_2315	phosphoribosylformylglycinamidine synthase I	681	up
ORF_2337	conserved hypothetical protein	327	up
ORF_2354	nicotinate phosphoribosyltransferase	1434	up
ORF_2358	D-serine ammonia-lyase	1311	up
ORF_2368	2-dehydropantoate 2-reductase	1020	up
ORF_2369	transport protein	927	up
ORF_2375	cell surface protein precursor	2937	up
ORF_2382	transcription regulator	900	up
ORF_2390	conserved hypothetical protein	1137	up
ORF_2399	serine--tRNA ligase	1272	up
ORF_2473	LIVCS family branched chain amino acid:cation symporter	1377	up
ORF_2499	phosphate ABC superfamily ATP binding cassette transporter, binding protein	876	up
ORF_2536	conserved hypothetical protein	378	up
ORF_2543	membrane protein	1074	up
ORF_2577	aminotransferase	1227	up
ORF_2581	amino acid ABC transporter, substrate binding protein	816	up
ORF_2600	PTS family fructose/mannitol (fru) porter component IIA	462	up
ORF_2610	conserved hypothetical protein	600	up
ORF_2623	phytoene synthase	882	up
ORF_2624	hypothetical protein	117	up
ORF_2635	amino acid permease	1425	up
ORF_2640	conserved hypothetical protein	1119	up
ORF_2642	quaternary ammonium compound-resistance protein	309	up
ORF_2643	hemolysin III	639	up
ORF_2665	conserved hypothetical protein	330	up
ORF_2666	PTS system mannose/fructose/N-acetylgalactosamine-specific transporter subunit IID	846	up
ORF_2667	phosphotransferase system, mannose/fructose/N-acetylgalactosamine-specific component IIC	849	up
ORF_2668	Fructose/mannose phosphotransferase system IIB component	495	up
ORF_2669	levA protein	435	up
ORF_2705	transport protein	1455	up
ORF_2706	chorismate synthase	1170	up
ORF_2707	conserved hypothetical protein	528	up
ORF_2708	3-phosphoshikimate 1-carboxyvinyltransferase	1299	up
ORF_2709	prephenate dehydrogenase	1098	up
ORF_2710	shikimate kinase	522	up
ORF_2783	negative regulator of proteolysis	402	up
ORF_2862	peptide-methionine (R)-S-oxide reductase	435	up
ORF_2863	protein-methionine-S-oxide reductase	516	up
ORF_2865	conserved hypothetical protein	855	up
ORF_2879	lipoprotein precursor	885	up
ORF_2917	conserved hypothetical protein	141	up
ORF_2918	ABC transporter, ATP-binding protein	678	up
ORF_2933	ABC transporter, ATP-binding protein	954	up
ORF_2934	ABC transporter, substrate binding protein	1011	up
ORF_2936	hypothetical protein	114	up
ORF_2937	conserved hypothetical protein	501	up
ORF_2938	amino acid ABC transporter, substrate binding protein	858	up
ORF_2939	amino acid ABC transporter, permease protein	672	up
ORF_2940	amino acid ABC transporter, ATP-binding protein	1068	up
ORF_2957	amino acid transport protein	1500	up
ORF_2974	conserved hypothetical protein	897	up
ORF_2976	conserved hypothetical protein	459	up
ORF_2977	sensory protein	486	up
ORF_2978	conserved hypothetical protein	249	up
ORF_3010	aminohydrolase	1134	up
ORF_3025	conserved hypothetical protein	471	up
ORF_3026	cell surface protein	3756	up
ORF_3085	glutamine synthetase repressor	381	up
ORF_3119	succinate-semialdehyde dehydrogenase (NAD(P)+)	591	up
ORF_3123	glycerol uptake facilitator protein	753	up
ORF_3145	conserved hypothetical protein	144	up
ORF_3146	conserved hypothetical protein	132	up
ORF_3147	conserved hypothetical protein	132	up
ORF_3148	conserved hypothetical protein	132	up
ORF_0130	fibronectin-binding protein	648	down
ORF_0158	conserved hypothetical protein	156	down
ORF_0272	galactokinase	1164	down
ORF_0525	copper-exporting ATPase	375	down
ORF_0526	copper-exporting ATPase	270	down
ORF_0527	P-ATPase superfamily P-type ATPase copper transporter	1866	down
ORF_1083	transcription antiterminator	849	down
ORF_1084	beta-glucosides PTS, EIIBCA	2001	down
ORF_1085	6-phospho-beta-glucosidase	1464	down
ORF_1209	conserved hypothetical protein	126	down
ORF_1281	multidrug transport protein	1503	down
ORF_1502	mannitol PTS, EIICB	1839	down
ORF_1503	transcription regulator	2076	down
ORF_2092	30S ribosomal protein S8	396	down
ORF_2093	50S ribosomal protein L5	543	down
ORF_2094	ribosomal protein L24	312	down
ORF_2095	ribosomal protein L14	369	down
ORF_2096	30S ribosomal protein S17	270	down
ORF_2097	50S ribosomal protein L29	195	down
ORF_2098	50S ribosomal protein L16	435	down
ORF_2099	30S ribosomal protein S3	654	down
ORF_2100	50S ribosomal protein L22	348	down
ORF_2101	30S ribosomal protein S19	276	down
ORF_2102	50S ribosomal protein L2	840	down
ORF_2103	50S ribosomal protein L23	294	down
ORF_2105	50S ribosomal protein L3	630	down
ORF_2106	30S ribosomal protein S10	309	down
ORF_2554	conserved hypothetical protein	129	down

## Sheet: FS48h_FS36h
Gene	Product	Length
ORF_0005	prophage Lp2 protein 2, integrase	1122	up
ORF_0010	cell surface protein precursor	2355	up
ORF_0011	transcription regulator	441	up
ORF_0016	conserved hypothetical protein	213	up
ORF_0017	conserved hypothetical protein	195	up
ORF_0019	conserved hypothetical protein	717	up
ORF_0026	hypothetical protein	174	up
ORF_0027	conserved hypothetical protein	561	up
ORF_0038	extracellular protein	1449	up
ORF_0050	integrase/recombinase, fragment (putative)	561	up
ORF_0062	hypothetical protein	123	up
ORF_0070	Protein of hypothetical function DUF1706	510	up
ORF_0078	extracellular protein	1539	up
ORF_0079	cell surface protein precursor	342	up
ORF_0080	cell surface protein precursor	1026	up
ORF_0081	extracellular protein	738	up
ORF_0106	1,4-alpha-glucan branching enzyme	1905	up
ORF_0107	glucose-1-phosphate adenylyltransferase	1140	up
ORF_0108	glucose-1-phosphate adenylyltransferase, subunit	1173	up
ORF_0128	P-nitrobenzoate reductase	651	up
ORF_0130	fibronectin-binding protein	648	up
ORF_0141	choloylglycine hydrolase	1017	up
ORF_0148	acyl carrier protein phosphodiesterase (putative)	648	up
ORF_0154	intracellular protease/amidase (putative)	675	up
ORF_0155	oxidoreductase	1005	up
ORF_0158	conserved hypothetical protein	156	up
ORF_0167	conserved hypothetical protein	279	up
ORF_0168	extracellular protein	573	up
ORF_0169	extracellular protein	693	up
ORF_0170	cell surface protein precursor	1014	up
ORF_0171	extracellular protein	2151	up
ORF_0180	transcription regulator	420	up
ORF_0184	A/G-specific adenine glycosylase (putative)	1101	up
ORF_0185	conserved hypothetical protein	366	up
ORF_0186	conserved hypothetical protein	507	up
ORF_0190	oxidoreductase (putative)	639	up
ORF_0191	acetyltransferase	459	up
ORF_0192	transport protein	918	up
ORF_0197	hypothetical protein	126	up
ORF_0242	transcription antiterminator	846	up
ORF_0304	transcription regulator	663	up
ORF_0305	GTP-binding protein LepA	1788	up
ORF_0306	conserved hypothetical protein	162	up
ORF_0312	GY family cell surface protein	3570	up
ORF_0383	integral membrane protein	564	up
ORF_0384	transcriptional regulator	315	up
ORF_0385	integral membrane protein	681	up
ORF_0395	branched-chain amino acid ABC transporter, permease protein	879	up
ORF_0396	branched-chain amino acid ABC transporter, permease protein	963	up
ORF_0400	extracellular protein	783	up
ORF_0401	cell surface protein precursor	1044	up
ORF_0402	cell surface protein precursor (putative)	378	up
ORF_0403	extracellular protein	1509	up
ORF_0404	ABC superfamily ATP binding cassette transporter	966	up
ORF_0405	ABC transporter, permease protein	1002	up
ORF_0406	ABC transporter, ATP-binding protein	687	up
ORF_0443	lipase/esterase (putative)	831	up
ORF_0447	integral membrane protein	1215	up
ORF_0454	acetyltransferase (putative)	528	up
ORF_0457	transcription regulator	330	up
ORF_0458	transcription regulator	621	up
ORF_0461	ABC transporter, ATP-binding and permease protein	1752	up
ORF_0462	ABC transporter, ATP-binding and permease protein	1788	up
ORF_0492	transcription regulator	435	up
ORF_0498	conserved hypothetical protein	762	up
ORF_0499	conserved hypothetical protein	186	up
ORF_0505	transport protein	1206	up
ORF_0506	transcription regulator (putative)	363	up
ORF_0509	cell surface protein	2790	up
ORF_0510	cell surface protein precursor	372	up
ORF_0511	extracellular protein	609	up
ORF_0512	cell surface protein precursor	1044	up
ORF_0516	extracellular protein	705	up
ORF_0517	cell surface protein precursor	1065	up
ORF_0518	cell surface protein precursor	426	up
ORF_0519	extracellular protein	1395	up
ORF_0525	copper-exporting ATPase	375	up
ORF_0529	1,3-propanediol dehydrogenase	1173	up
ORF_0545	conserved hypothetical protein	495	up
ORF_0546	oxidoreductase (putative)	639	up
ORF_0550	transcription regulator	912	up
ORF_0554	DNA-3-methyladenine glycosylase I	645	up
ORF_0560	extracellular protein	615	up
ORF_0561	transcription regulator	444	up
ORF_0562	dehydrogenase	1059	up
ORF_0563	6-phospho-beta-glucosidase	1383	up
ORF_0564	cellobiose PTS, EIIC	1473	up
ORF_0565	cellobiose PTS, EIIB	327	up
ORF_0566	cellobiose PTS, EIIA	447	up
ORF_0569	conserved hypothetical protein	315	up
ORF_0572	cell surface protein precursor (putative)	3225	up
ORF_0574	rep protein	954	up
ORF_0575	conserved hypothetical protein	219	up
ORF_0581	GPH family glycoside-pentoside-hexuronide:cation symporter	1401	up
ORF_0582	lipase/esterase	1017	up
ORF_0590	transcription regulator	327	up
ORF_0599	acyl carrier protein phosphodiesterase	630	up
ORF_0600	transcription regulator	474	up
ORF_0602	fumarate reductase, flavoprotein subunit precursor	1866	up
ORF_0603	transcription regulator	927	up
ORF_0608	GY family cell surface protein	3783	up
ORF_0630	transcription regulator	369	up
ORF_0631	integral membrane protein	369	up
ORF_0632	hypothetical protein	117	up
ORF_0635	transposase	219	up
ORF_0636	conserved hypothetical protein	258	up
ORF_0651	GroEL supressor protein SugE	315	up
ORF_0656	multidrug transporter	1155	up
ORF_0657	transcription regulator	453	up
ORF_0658	integral membrane protein	879	up
ORF_0664	transcription antiterminator	843	up
ORF_0688	biotin--	1005	up
ORF_0690	putative pyruvate oxidase	1761	up
ORF_0695	transcription regulator	486	up
ORF_0704	conserved hypothetical protein	783	up
ORF_0737	purine nucleoside phosphorylase (putative)	759	up
ORF_0739	oxidoreductase (putative)	603	up
ORF_0741	small heat shock protein	423	up
ORF_0742	integral membrane protein	171	up
ORF_0743	integral membrane protein	201	up
ORF_0744	conserved hypothetical protein	444	up
ORF_0746	transcription regulator	300	up
ORF_0747	transport protein	1194	up
ORF_0748	oxidoreductase	849	up
ORF_0752	extracellular protein	813	up
ORF_0754	oxidoreductase	1110	up
ORF_0786	mannosyl-glycoprotein endo-beta-N-acetylglucosaminidase	2847	up
ORF_0813	transcription regulator	738	up
ORF_0824	possible o-pyrocatechuate decarboxylase	1002	up
ORF_0853	conserved hypothetical protein	744	up
ORF_0854	transport protein	1188	up
ORF_0855	conserved hypothetical protein	318	up
ORF_0868	poly(glycerol-phosphate) alpha-glucosyltransferase	1578	up
ORF_0869	ABC transporter, ATP-binding and permease protein	1764	up
ORF_0870	conserved hypothetical protein	132	up
ORF_0871	conserved hypothetical protein	144	up
ORF_0883	cell surface protein precursor	1713	up
ORF_0906	hypothetical protein	183	up
ORF_0907	hypothetical protein	198	up
ORF_0908	hypothetical protein	132	up
ORF_0909	conserved hypothetical protein	159	up
ORF_0921	multidrug transport protein	1197	up
ORF_0923	excinuclease ABC subunit B	2004	up
ORF_0947	cell surface protein	7947	up
ORF_0966	conserved hypothetical protein	132	up
ORF_0973	conserved hypothetical protein	426	up
ORF_0974	nitro/flavin reductase	753	up
ORF_0991	conserved hypothetical protein	489	up
ORF_1002	conserved hypothetical protein	165	up
ORF_1049	conserved hypothetical protein	732	up
ORF_1050	Na(+)/H(+) antiporter	1197	up
ORF_1053	lipase/esterase (putative)	837	up
ORF_1057	arabinose transport protein	1401	up
ORF_1058	L-ribulokinase (putative)	1602	up
ORF_1059	L-ribulose-5-phosphate 4-epimerase	729	up
ORF_1060	L-arabinose isomerase	1425	up
ORF_1061	maltose O-acetyltransferase	561	up
ORF_1062	conserved hypothetical protein	399	up
ORF_1063	putative phosphoketolase	2391	up
ORF_1087	outer surface protein	1056	up
ORF_1092	putative fructose-like phosphotransferase system subunit EIIA	444	up
ORF_1093	putative PTS transporter components IIBC	1458	up
ORF_1105	ABC transporter, ATP-binding protein	423	up
ORF_1119	integral membrane protein	270	up
ORF_1131	transcription regulator	354	up
ORF_1132	ABC transporter, ATP-binding protein	894	up
ORF_1142	integral membrane protein	564	up
ORF_1143	biotin-(acetyl-CoA-carboxylase)ligase and biotin operon repressor	972	up
ORF_1144	conserved hypothetical protein	123	up
ORF_1150	transcription regulator	543	up
ORF_1151	transport protein	1446	up
ORF_1168	multidrug transport protein	1485	up
ORF_1169	conserved hypothetical protein	501	up
ORF_1170	ribosomal protein acetylating enzyme	558	up
ORF_1171	integral membrane protein	1011	up
ORF_1172	transcription regulator	828	up
ORF_1175	putative uncharacterized protein	945	up
ORF_1197	competence protein	1086	up
ORF_1246	extracellular protein	732	up
ORF_1247	cell surface protein	1035	up
ORF_1248	extracellular protein	1449	up
ORF_1254	conserved hypothetical protein	204	up
ORF_1281	multidrug transport protein	1503	up
ORF_1282	hypothetical protein	114	up
ORF_1283	hypothetical protein	1287	up
ORF_1284	hypothetical protein	405	up
ORF_1300	sugar ABC superfamily ATP binding cassette transporter, membrane protein	843	up
ORF_1301	sugar ABC transporter, substrate binding protein (putative)	1353	up
ORF_1312	conserved hypothetical protein	117	up
ORF_1313	transcription regulator	393	up
ORF_1314	conserved hypothetical protein	642	up
ORF_1320	extracellular protein, membrane-anchored (putative)	339	up
ORF_1321	integral membrane protein	372	up
ORF_1322	CAAX family protease	687	up
ORF_1334	conserved hypothetical protein	1638	up
ORF_1335	sulfate adenylyltransferase	1176	up
ORF_1341	sodium/sulfate symport protein (putative)	1776	up
ORF_1342	cation efflux protein (putative)	1392	up
ORF_1343	conserved hypothetical protein	246	up
ORF_1344	GNAT family acetyltransferase	447	up
ORF_1347	hypothetical protein	114	up
ORF_1350	transcription regulator levR	2556	up
ORF_1361	amino acid efflux protein	609	up
ORF_1386	MutT/NudX family protein (putative)	414	up
ORF_1448	methyltransferase (putative)	735	up
ORF_1449	conserved hypothetical protein	1152	up
ORF_1469	nicking enzyme (TraA)-like	2064	up
ORF_1508	conserved hypothetical protein	555	up
ORF_1512	NADPH-dependent FMN reductase	672	up
ORF_1513	transcription regulator	696	up
ORF_1514	cellobiose PTS, EIIC	1278	up
ORF_1515	conserved hypothetical protein	267	up
ORF_1516	conserved hypothetical protein	1095	up
ORF_1517	dihydroorotase	1119	up
ORF_1518	L-seryl-tRNA(Sec) selenium transferase (putative)	1101	up
ORF_1519	conserved hypothetical protein	735	up
ORF_1520	2-keto-3-deoxygluconate kinase	987	up
ORF_1526	conserved hypothetical protein	279	up
ORF_1527	integral membrane protein	288	up
ORF_1531	beta-glucosides PTS, EIIABC	1968	up
ORF_1542	transcription regulator	393	up
ORF_1548	conserved hypothetical protein	312	up
ORF_1558	ABC superfamily ATP binding cassette transporter, membrane protein	1479	up
ORF_1559	conserved hypothetical protein	366	up
ORF_1560	conserved hypothetical protein	213	up
ORF_1576	multidrug transport protein	1203	up
ORF_1590	exopolysaccharide biosynthesis protein	759	up
ORF_1591	capsular exopolysaccharide family protein	681	up
ORF_1592	exopolysaccharide biosynthesis protein	795	up
ORF_1593	UDP-glucose 4-epimerase	939	up
ORF_1594	priming glycosyltransferase	672	up
ORF_1595	glycosyltransferase	717	up
ORF_1612	integral membrane protein	1212	up
ORF_1614	methyltransferase (putative)	762	up
ORF_1615	conserved hypothetical protein	207	up
ORF_1616	prophage Lp2 protein 2, integrase	1164	up
ORF_1617	transposase	186	up
ORF_1650	UDP-glucose 4-epimerase	948	up
ORF_1652	glycosyl transferase group 2	765	up
ORF_1660	glycosyltransferase	909	up
ORF_1661	glycosyltransferase	933	up
ORF_1667	O-acetyltransferase	1080	up
ORF_1669	conserved hypothetical protein	747	up
ORF_1681	conserved hypothetical protein	126	up
ORF_1750	lipoprotein	972	up
ORF_1751	ABC transporter, ATP-binding and permease protein	1890	up
ORF_1752	multidrug resistance ABC superfamily ATP binding cassette transporter, ABC/membrane protein	1731	up
ORF_1755	prophage Lp2 protein 58	384	up
ORF_1756	prophage Lp1 protein 59	297	up
ORF_1757	prophage Lp1 protein 58, lysin	1167	up
ORF_1758	conserved hypothetical protein	123	up
ORF_1759	conserved hypothetical protein	450	up
ORF_1761	prophage protein	363	up
ORF_1779	PBSX family phage terminase	1239	up
ORF_1782	hypothetical protein	198	up
ORF_1783	prophage Lp1 protein 33	462	up
ORF_1784	prophage Lp2 protein 23	519	up
ORF_1785	prophage Lp2 protein 21	288	up
ORF_1792	putative uncharacterized protein	135	up
ORF_1798	HsdR family type I site-specific deoxyribonuclease	3138	up
ORF_1799	HsdS, type I site-specific deoxyribonuclease	1188	up
ORF_1800	conserved hypothetical protein	1527	up
ORF_1801	putative type I site-specific deoxyribonuclease	1374	up
ORF_1802	conserved hypothetical protein	363	up
ORF_1806	Lactate dehydrogenase-like 2-hydroxyacid dehydrogenase	960	up
ORF_1807	putative LtrC	1125	up
ORF_1808	putative uncharacterized protein	216	up
ORF_1809	DNA topoisomerase	372	up
ORF_1823	lactate oxidase	1101	up
ORF_1824	pyruvate oxidase	1749	up
ORF_1827	conserved hypothetical protein	411	up
ORF_1828	sugar specific permease (putative)	690	up
ORF_1829	Rhamnulose-1-phosphate aldolase	852	up
ORF_1833	MFS family rhamnose tranport protein	1329	up
ORF_1858	sugar transport protein	1386	up
ORF_1859	alpha-glucosidase	1677	up
ORF_1860	beta-glucosidase	1386	up
ORF_1861	ROK family protein	879	up
ORF_1862	alpha-mannosidase (putative)	2700	up
ORF_1863	conserved hypothetical protein	1290	up
ORF_1876	putative uncharacterized protein lp_3645	1851	up
ORF_1877	AraC family transcriptional regulator	834	up
ORF_1878	ABC transporter, ATP-binding and permease protein	1758	up
ORF_1989	conserved hypothetical protein	129	up
ORF_2000	hypothetical protein	120	up
ORF_2030	cell surface hydrolase	2706	up
ORF_2041	conserved hypothetical protein	123	up
ORF_2065	conserved hypothetical protein	1089	up
ORF_2110	type 4 prepilin-like proteins leader peptide processing enzyme (putative)	408	up
ORF_2116	conserved hypothetical protein	129	up
ORF_2120	conserved hypothetical protein	156	up
ORF_2134	conserved hypothetical protein	465	up
ORF_2135	multidrug transport protein	1479	up
ORF_2136	conserved hypothetical protein	723	up
ORF_2138	lipoprotein precursor	1143	up
ORF_2146	transcription regulator	1008	up
ORF_2147	heat shock protein HSP33	888	up
ORF_2160	conserved hypothetical protein	126	up
ORF_2179	conserved hypothetical protein	195	up
ORF_2182	Transposase	264	up
ORF_2183	conserved hypothetical protein	168	up
ORF_2215	cell surface protein precursor	1665	up
ORF_2238	conserved hypothetical protein	357	up
ORF_2246	conserved hypothetical protein	507	up
ORF_2247	conserved hypothetical protein	117	up
ORF_2255	brp/Blh family beta-carotene 15,15'-monooxygenase	876	up
ORF_2256	conserved hypothetical protein	915	up
ORF_2279	aminotransferase with N	1365	up
ORF_2280	aromatic amino acid specific aminotransferase	1173	up
ORF_2281	dihydrodipicolinate synthase	870	up
ORF_2285	transcription regulator	897	up
ORF_2304	diguanylate cyclase/phosphodiesterase domain-containing protein	654	up
ORF_2305	diguanylate cyclase/phosphodiesterase domain-containing protein	129	up
ORF_2306	conserved hypothetical protein	519	up
ORF_2307	glycosyltransferase (putative)	1329	up
ORF_2308	conserved hypothetical protein	669	up
ORF_2329	integral membrane protein (putative)	276	up
ORF_2356	ABC superfamily ATP binding cassette transporter, permease protein	1212	up
ORF_2357	ABC transporter, ATP-binding protein	744	up
ORF_2374	cell surface protein precursor	3120	up
ORF_2375	cell surface protein precursor	2937	up
ORF_2382	transcription regulator	900	up
ORF_2404	conserved hypothetical protein	132	up
ORF_2410	integral membrane protein	1023	up
ORF_2421	conserved hypothetical protein	138	up
ORF_2443	cellobiose PTS, EIIC	1359	up
ORF_2450	ATP-dependent DNA helicase	2310	up
ORF_2452	integral membrane protein plnV	681	up
ORF_2453	integral membrane protein PlnU	669	up
ORF_2457	PlnH	225	up
ORF_2554	conserved hypothetical protein	129	up
ORF_2555	conserved hypothetical protein	120	up
ORF_2556	transport protein	723	up
ORF_2564	peptidyl-prolyl cis-trans isomerase	930	up
ORF_2582	conserved hypothetical protein	576	up
ORF_2586	PTS family porter	1926	up
ORF_2587	alpha-glucosidase	1668	up
ORF_2604	beta-glucosides PTS, EIIABC	1995	up
ORF_2616	effector of murein hydrolase (putative)	420	up
ORF_2617	effector of murein hydrolase (putative)	729	up
ORF_2618	DegV family protein	876	up
ORF_2641	quaternary ammonium compound-resistance protein	384	up
ORF_2642	quaternary ammonium compound-resistance protein	309	up
ORF_2656	conserved hypothetical protein	153	up
ORF_2671	resolvase	174	up
ORF_2672	conserved hypothetical protein	288	up
ORF_2687	HAD superfamily hydrolase	723	up
ORF_2714	heat-inducible transcription repressor	1044	up
ORF_2715	co-chaperone GrpE	609	up
ORF_2716	molecular chaperone DnaK	1869	up
ORF_2718	serine-type D-Ala-D-Ala carboxypeptidase	1176	up
ORF_2719	D-Ala-teichoic acid biosynthesis protein (putative)	150	up
ORF_2720	D-alanine--D-alanyl carrier protein ligase	1527	up
ORF_2721	D-alanyl transfer protein DltB	1215	up
ORF_2723	D-alanyl transfer protein DltD	1278	up
ORF_2727	DNA-3-methyladenine glycosylase	630	up
ORF_2755	conserved hypothetical protein	129	up
ORF_2756	transcription regulator	390	up
ORF_2757	ABC superfamily ATP binding cassette transporter, ABC protein	894	up
ORF_2758	ABC transporter, permease protein	978	up
ORF_2759	ABC transporter, permease protein	1059	up
ORF_2760	ABC superfamily ATP binding cassette transporter, membrane protein	753	up
ORF_2761	ABC transporter, ATP-binding protein	900	up
ORF_2762	integral membrane protein	606	up
ORF_2763	transcription regulator	468	up
ORF_2764	acetyltransferase (putative)	468	up
ORF_2765	conserved hypothetical protein	150	up
ORF_2768	histidine protein kinase; sensor protein	1104	up
ORF_2769	response regulator	606	up
ORF_2772	oxidoreductase	945	up
ORF_2773	transcription regulator	891	up
ORF_2775	NAD-dependent epimerase/dehydratase	642	up
ORF_2776	cell surface hydrolase (putative)	816	up
ORF_2777	transcription regulator	714	up
ORF_2778	galactoside O-acetyltransferase	609	up
ORF_2785	transcription regulator	753	up
ORF_2788	transcription regulator (putative)	450	up
ORF_2789	transport protein	1395	up
ORF_2790	phosphopyruvate hydratase	1290	up
ORF_2791	cadmium-/manganese-transporting P-type ATPase	2277	up
ORF_2793	conserved hypothetical protein	144	up
ORF_2796	transcription regulator	534	up
ORF_2797	conserved hypothetical protein	369	up
ORF_2800	ABC transporter, ATP-binding protein	942	up
ORF_2801	ABC transporter, permease protein	771	up
ORF_2802	integral membrane protein	1206	up
ORF_2806	chaperone protein ClpB	2604	up
ORF_2819	conserved hypothetical protein	1044	up
ORF_2828	conserved hypothetical protein	135	up
ORF_2841	bacterial luciferase	1059	up
ORF_2842	conserved hypothetical protein	699	up
ORF_2847	hypothetical protein	138	up
ORF_2848	GTPase	855	up
ORF_2849	ribonuclease HII	768	up
ORF_2850	DNA processing protein	867	up
ORF_2864	conserved hypothetical protein	201	up
ORF_2867	glycosyltransferase (putative)	1305	up
ORF_2870	MarR family transcriptional regulator	438	up
ORF_2881	conserved hypothetical protein	186	up
ORF_2897	ABC transporter, ATP-binding protein	900	up
ORF_2899	conserved hypothetical protein	726	up
ORF_2900	conserved hypothetical protein	372	up
ORF_2901	chloramphenicol O-acetyltransferase	669	up
ORF_2902	conserved hypothetical protein	120	up
ORF_2985	conserved hypothetical protein	432	up
ORF_2987	transport protein	1704	up
ORF_2996	acetyl-CoA carboxylase, carboxyl transferase subunit beta	843	up
ORF_2997	acetyl-CoA carboxylase, biotin carboxylase subunit	1389	up
ORF_2998	(3R)-hydroxymyristoyl-(acyl carrier protein) dehydratase	414	up
ORF_2999	acetyl-CoA carboxylase, biotin carboxyl carrier protein	462	up
ORF_3000	3-oxoacyl-(acyl-carrier protein) synthase II	1233	up
ORF_3001	3-oxoacyl-	723	up
ORF_3002	(acyl-carrier protein) S-malonyltransferase	933	up
ORF_3003	acyl carrier protein	249	up
ORF_3004	3-oxoacyl-(acyl carrier protein) synthase III	987	up
ORF_3005	(3R)-hydroxymyristoyl-[acyl carrier protein] dehydratase	444	up
ORF_3015	tryptophan synthase alpha subunit	795	up
ORF_3016	tryptophan synthase beta subunit	1200	up
ORF_3017	phosphoribosylanthranilate isomerase	627	up
ORF_3018	indole-3-glycerol-phosphate synthase	783	up
ORF_3025	conserved hypothetical protein	471	up
ORF_3026	cell surface protein	3756	up
ORF_3027	hypothetical protein	390	up
ORF_3030	tRNA (guanine-N1-)-methyltransferase	741	up
ORF_3031	16S rRNA processing protein	525	up
ORF_3145	conserved hypothetical protein	144	up
ORF_3146	conserved hypothetical protein	132	up
ORF_3147	conserved hypothetical protein	132	up
ORF_3148	conserved hypothetical protein	132	up
ORF_3149	conserved hypothetical protein	2763	up
ORF_3150	conserved hypothetical protein	1977	up
ORF_3151	transcription regulator (putative)	486	up
ORF_0008	conserved hypothetical protein	126	down
ORF_0044	oligopeptide ABC superfamily ATP binding cassette transporter, binding protein	1506	down
ORF_0115	conserved hypothetical protein	450	down
ORF_0174	conserved hypothetical protein	306	down
ORF_0175	Na+/H+ antiporter NhaC	1425	down
ORF_0176	D-serine/D-alanine/glycine:H+ symporter	1383	down
ORF_0188	conserved hypothetical protein	339	down
ORF_0194	integral membrane protein	678	down
ORF_0248	cellobiose PTS, EIIC	1338	down
ORF_0269	alpha-galactosidase	2217	down
ORF_0283	transcription regulator of beta-galactosidase gene	1011	down
ORF_0284	beta-galactosidase I	2052	down
ORF_0285	lactose transport protein	1947	down
ORF_0286	branched-chain amino acid transport protein	540	down
ORF_0287	branched-chain amino acid transport protein	303	down
ORF_0329	multidrug transport protein (putative)	1416	down
ORF_0331	conserved hypothetical protein	1080	down
ORF_0332	conserved hypothetical protein	564	down
ORF_0365	Clp protease domain protein	753	down
ORF_0366	major head protein Cps	1179	down
ORF_0367	putative uncharacterized protein	306	down
ORF_0368	Gp8 protein	213	down
ORF_0369	gp9 protein	408	down
ORF_0370	gp10 protein	423	down
ORF_0371	putative major tail protein	612	down
ORF_0372	putative uncharacterized protein	315	down
ORF_0373	hypothetical protein	222	down
ORF_0374	phage tail tape measure protein	4545	down
ORF_0375	putative uncharacterized protein	822	down
ORF_0376	reticulocyte binding protein	4947	down
ORF_0377	conserved hypothetical protein	483	down
ORF_0378	conserved hypothetical protein	435	down
ORF_0379	conserved hypothetical protein	378	down
ORF_0380	conserved hypothetical protein	273	down
ORF_0381	conserved hypothetical protein	285	down
ORF_0382	prophage Lp2 protein 56, lysin	933	down
ORF_0387	conserved hypothetical protein	432	down
ORF_0388	manganese transport protein	1593	down
ORF_0408	nitroreductase	654	down
ORF_0419	possible toxin regulator	1095	down
ORF_0614	conserved hypothetical protein	573	down
ORF_0615	conserved hypothetical protein	333	down
ORF_0619	alkaline shock protein	441	down
ORF_0620	alkaline shock protein	423	down
ORF_0621	conserved hypothetical protein	183	down
ORF_0622	conserved hypothetical protein	546	down
ORF_0623	integral membrane protein	255	down
ORF_0693	transport protein	1308	down
ORF_0714	conserved hypothetical protein	234	down
ORF_0731	conserved hypothetical protein	1593	down
ORF_0738	stress-responsive transcription regulator (putative)	195	down
ORF_0761	conserved hypothetical protein	786	down
ORF_0779	maltose ABC superfamily ATP binding cassette transporter, maltose-binding protein	1254	down
ORF_0780	maltose/maltodextrin ABC transporter, permease protein	1290	down
ORF_0781	maltose/maltodextrin ABC transporter, permease protein	885	down
ORF_0782	maltodextrose utilization protein MalA	831	down
ORF_0816	phosphoenolpyruvate carboxykinase (ATP)	1662	down
ORF_0817	conserved hypothetical protein	198	down
ORF_0835	homoserine O-succinyltransferase	876	down
ORF_0836	O-acetylhomoserine (thiol)-lyase	1287	down
ORF_0880	glycerol kinase	1518	down
ORF_0881	glycerol-3-phosphate dehydrogenase	1830	down
ORF_0882	glycerol uptake facilitator protein	720	down
ORF_0893	transcription regulator	156	down
ORF_0894	transcription regulator	165	down
ORF_0895	acetoin(diacetyl)reductase	771	down
ORF_0896	S-ribosylhomocysteinase	474	down
ORF_0897	conserved hypothetical protein	861	down
ORF_0898	amino acid ABC transporter, permease protein	678	down
ORF_0899	ABC superfamily ATP binding cassette transporter, binding protein	1077	down
ORF_0900	GAF domain protein	480	down
ORF_0967	D-fructose-6-phosphate amidotransferase	1818	down
ORF_0968	diguanylate cyclase/phosphodiesterase domain 2 containing protein	666	down
ORF_1041	integral membrane protein	246	down
ORF_1042	conserved hypothetical protein	135	down
ORF_1097	formate C-acetyltransferase	2259	down
ORF_1098	formate acetyltransferase activating enzyme	687	down
ORF_1114	integral membrane protein	366	down
ORF_1137	sugar transport protein	1317	down
ORF_1141	conserved hypothetical protein	246	down
ORF_1152	AMT family ammonium or ammonia transporter	1263	down
ORF_1153	L-2-hydroxyisocaproate dehydrogenase	960	down
ORF_1154	integral membrane protein	270	down
ORF_1158	integral membrane protein	369	down
ORF_1231	isoleucyl-tRNA synthetase	2799	down
ORF_1332	bifunctional homocysteine S-methyltransferase/5,10-methylenetetrahydrofolate reductase protein	1857	down
ORF_1333	5-methyltetrahydropteroyltriglutamate--homocysteine S-methyltransferase	2307	down
ORF_1414	conserved hypothetical protein	165	down
ORF_1431	threonine-tRNA ligase 1	1965	down
ORF_1509	conserved hypothetical protein	324	down
ORF_1510	nucleoside-diphosphate kinase	465	down
ORF_1547	cellobiose PTS, EIIC	1326	down
ORF_1634	aspartate ammonia-lyase	1401	down
ORF_1637	conserved hypothetical protein	843	down
ORF_1639	lipoprotein precursor, peptide binding protein OppA-like protein	1662	down
ORF_1643	phosphoglycerate mutase	624	down
ORF_1709	universal stress protein	486	down
ORF_1719	amino acid ABC transporter, ATP-binding protein	1032	down
ORF_1735	uracil transport protein	1281	down
ORF_1748	branched-chain amino acid aminotransferase	1029	down
ORF_1849	mannose-6-phosphate isomerase	1344	down
ORF_1896	bifunctional acetaldehyde-CoA/alcohol dehydrogenase	2604	down
ORF_1900	2-oxo-hept-3-ene-1,7-dioate hydratase; 2-oxo-hept-4-ene-1,7-dioate hydratase	801	down
ORF_1990	glutamate dehydrogenase	1347	down
ORF_1997	universal stress protein UspA family nucleotide-binding protein	441	down
ORF_2048	cation transport protein	1419	down
ORF_2060	3-dehydroquinate synthase	1080	down
ORF_2061	3-deoxy-7-phosphoheptulonate synthase	996	down
ORF_2062	shikimate 5-dehydrogenase	894	down
ORF_2063	transketolase	2013	down
ORF_2159	conserved hypothetical protein	639	down
ORF_2161	proline-specific peptidase	906	down
ORF_2162	oligopeptide ABC superfamily ATP binding cassette transporter substrate binding protein	1626	down
ORF_2167	bifunctional ornithine acetyltransferase/N-acetylglutamate synthase protein	1209	down
ORF_2168	N-acetyl-gamma-glutamyl-phosphate reductase	1026	down
ORF_2171	ABC superfamily ATP binding cassette transporter, ABC protein	771	down
ORF_2172	Putative aliphatic sulfonates transport permease protein ssuC	1014	down
ORF_2173	NMT1/THI5 like protein	1053	down
ORF_2233	conserved hypothetical protein	282	down
ORF_2243	cystathionine gamma-synthase	1122	down
ORF_2245	conserved hypothetical protein	663	down
ORF_2259	glycosyltransferase (putative)	1176	down
ORF_2291	orotate phosphoribosyltransferase	639	down
ORF_2292	orotidine-5'-phosphate decarboxylase	714	down
ORF_2293	dihydroorotate dehydrogenase 1B	918	down
ORF_2294	carbamoyl-phosphate synthase (glutamine-hydrolyzing), large subunit	3177	down
ORF_2299	purine transport regulator	1590	down
ORF_2300	xanthine permease	1341	down
ORF_2333	universal stress protein UspA	537	down
ORF_2368	2-dehydropantoate 2-reductase	1020	down
ORF_2369	transport protein	927	down
ORF_2390	conserved hypothetical protein	1137	down
ORF_2493	ribosomal protein S30EA	567	down
ORF_2577	aminotransferase	1227	down
ORF_2581	amino acid ABC transporter, substrate binding protein	816	down
ORF_2613	conserved hypothetical protein	228	down
ORF_2623	phytoene synthase	882	down
ORF_2624	hypothetical protein	117	down
ORF_2640	conserved hypothetical protein	1119	down
ORF_2665	conserved hypothetical protein	330	down
ORF_2666	PTS system mannose/fructose/N-acetylgalactosamine-specific transporter subunit IID	846	down
ORF_2667	phosphotransferase system, mannose/fructose/N-acetylgalactosamine-specific component IIC	849	down
ORF_2668	Fructose/mannose phosphotransferase system IIB component	495	down
ORF_2669	levA protein	435	down
ORF_2709	prephenate dehydrogenase	1098	down
ORF_2710	shikimate kinase	522	down
ORF_2918	ABC transporter, ATP-binding protein	678	down
ORF_2920	microcin immunity protein	969	down
ORF_2936	hypothetical protein	114	down
ORF_2937	conserved hypothetical protein	501	down
ORF_2938	amino acid ABC transporter, substrate binding protein	858	down
ORF_2939	amino acid ABC transporter, permease protein	672	down
ORF_2940	amino acid ABC transporter, ATP-binding protein	1068	down
ORF_2957	amino acid transport protein	1500	down
ORF_2958	4-aminobutyrate aminotransferase	1350	down
ORF_2969	conserved hypothetical protein	222	down
ORF_2971	integral membrane protein	267	down
ORF_2972	conserved hypothetical protein	120	down
ORF_2973	integral membrane protein	249	down
ORF_2974	conserved hypothetical protein	897	down
ORF_2975	integral membrane protein	366	down
ORF_2976	conserved hypothetical protein	459	down
ORF_2977	sensory protein	486	down
ORF_3078	hypothetical protein	126	down
ORF_3084	glutamate--ammonia ligase	1347	down
ORF_3123	glycerol uptake facilitator protein	753	down

## Sheet: FS60h_FS48h
Gene	Product	Length
ORF_0001	transporter, major facilitator family protein	1392	up
ORF_3143	putative transposase	237	up
ORF_3119	succinate-semialdehyde dehydrogenase (NAD(P)+)	591	up
ORF_3116	transposase	315	up
ORF_3115	transposase	678	up
ORF_3106	conserved hypothetical protein	510	up
ORF_3105	MarR family transcriptional regulator	360	up
ORF_3104	phenylalanyl-tRNA synthetase alpha subunit	1047	up
ORF_3057	conserved hypothetical protein	336	up
ORF_3041	DNA helicase RecG	2040	up
ORF_3040	putative glycerol-3-phosphate acyltransferase PlsX	1047	up
ORF_3027	hypothetical protein	390	up
ORF_3026	cell surface protein	3756	up
ORF_3025	conserved hypothetical protein	471	up
ORF_2985	conserved hypothetical protein	432	up
ORF_2902	conserved hypothetical protein	120	up
ORF_2901	chloramphenicol O-acetyltransferase	669	up
ORF_2900	conserved hypothetical protein	372	up
ORF_2899	conserved hypothetical protein	726	up
ORF_2886	transport protein	1188	up
ORF_2879	lipoprotein precursor	885	up
ORF_2877	L-lactate transport protein (putative)	1593	up
ORF_2868	integral membrane protein	408	up
ORF_2865	conserved hypothetical protein	855	up
ORF_2863	protein-methionine-S-oxide reductase	516	up
ORF_2862	peptide-methionine (R)-S-oxide reductase	435	up
ORF_2820	ATP-dependent DNA helicase RecQ	1440	up
ORF_2819	conserved hypothetical protein	1044	up
ORF_2818	integral membrane protein	585	up
ORF_2808	DNA-directed DNA polymerase III alpha subunit	3351	up
ORF_2806	chaperone protein ClpB	2604	up
ORF_2798	phosphoenolpyruvate synthase	2397	up
ORF_2797	conserved hypothetical protein	369	up
ORF_2796	transcription regulator	534	up
ORF_2792	oxidoreductase	975	up
ORF_2788	transcription regulator (putative)	450	up
ORF_2785	transcription regulator	753	up
ORF_2784	7,8-dihydro-8-oxoguanine-triphosphatase (putative)	606	up
ORF_2779	phosphoglycolate phosphatase	669	up
ORF_2760	ABC superfamily ATP binding cassette transporter, membrane protein	753	up
ORF_2759	ABC transporter, permease protein	1059	up
ORF_2758	ABC transporter, permease protein	978	up
ORF_2757	ABC superfamily ATP binding cassette transporter, ABC protein	894	up
ORF_2756	transcription regulator	390	up
ORF_2755	conserved hypothetical protein	129	up
ORF_2753	DNA primase DnaG	1881	up
ORF_2729	conserved hypothetical protein	753	up
ORF_2728	ribosomal protein L11 methyltransferase (putative)	951	up
ORF_2714	heat-inducible transcription repressor	1044	up
ORF_2671	resolvase	174	up
ORF_2642	quaternary ammonium compound-resistance protein	309	up
ORF_2641	quaternary ammonium compound-resistance protein	384	up
ORF_2635	amino acid permease	1425	up
ORF_2634	conserved hypothetical protein	150	up
ORF_2625	cell surface hydrolase, membrane-bound (putative)	843	up
ORF_2617	effector of murein hydrolase (putative)	729	up
ORF_2616	effector of murein hydrolase (putative)	420	up
ORF_2614	3',5'-cyclic-nucleotide phosphodiesterase	855	up
ORF_2611	ferric uptake regulator	483	up
ORF_2604	beta-glucosides PTS, EIIABC	1995	up
ORF_2591	ABC transporter, ATP-binding protein	651	up
ORF_2590	ABC superfamily ATP binding cassette transporter, permease protein	756	up
ORF_2588	transcription regulator	1002	up
ORF_2587	alpha-glucosidase	1668	up
ORF_2586	PTS family porter	1926	up
ORF_2582	conserved hypothetical protein	576	up
ORF_2544	xylose operon regulator	450	up
ORF_2543	membrane protein	1074	up
ORF_2523	conserved hypothetical protein	378	up
ORF_2511	diguanylate cyclase/phosphodiesterase domain-containing protein	681	up
ORF_2486	conserved hypothetical protein	180	up
ORF_2485	cadmium-/zinc-/cobalt-transporting ATPase	1845	up
ORF_2467	bacteriocin precursor peptide PlnN (putative)	168	up
ORF_2453	integral membrane protein PlnU	669	up
ORF_2421	conserved hypothetical protein	138	up
ORF_2410	integral membrane protein	1023	up
ORF_2409	lipoprotein precursor (putative)	987	up
ORF_2398	serine transporter	1281	up
ORF_2397	L-serine ammonia-lyase beta subunit	654	up
ORF_2396	L-serine dehydratase, alpha subunit	900	up
ORF_2395	conserved hypothetical protein	729	up
ORF_2382	transcription regulator	900	up
ORF_2375	cell surface protein precursor	2937	up
ORF_2374	cell surface protein precursor	3120	up
ORF_2371	oxidoreductase	573	up
ORF_2358	D-serine ammonia-lyase	1311	up
ORF_2357	ABC transporter, ATP-binding protein	744	up
ORF_2356	ABC superfamily ATP binding cassette transporter, permease protein	1212	up
ORF_2352	acetyltransferase (putative)	1182	up
ORF_2319	phosphoribosylaminoimidazole carboxylase, catalytic subunit	486	up
ORF_2318	phosphoribosylaminoimidazole carboxylase ATPase subunit	1131	up
ORF_2315	phosphoribosylformylglycinamidine synthase I	681	up
ORF_2314	phosphoribosylformylglycinamidine synthase II	2220	up
ORF_2313	amidophosphoribosyltransferase	1455	up
ORF_2312	phosphoribosylaminoimidazole synthetase	1026	up
ORF_2270	conserved hypothetical protein	342	up
ORF_2242	thioredoxin H-type	321	up
ORF_2239	acetyltransferase	285	up
ORF_2238	conserved hypothetical protein	357	up
ORF_2234	alpha/beta hydrolase	924	up
ORF_2233	conserved hypothetical protein	282	up
ORF_2232	transcription regulator	390	up
ORF_2231	ABC transporter, ATP-binding protein	711	up
ORF_2230	ABC transporter, permease protein	774	up
ORF_2215	cell surface protein precursor	1665	up
ORF_2214	cell surface hydrolase, membrane-bound (putative)	762	up
ORF_2186	maltose O-acetyltransferase	555	up
ORF_2160	conserved hypothetical protein	126	up
ORF_2147	heat shock protein HSP33	888	up
ORF_2146	transcription regulator	1008	up
ORF_2139	conserved hypothetical protein	504	up
ORF_2134	conserved hypothetical protein	465	up
ORF_2048	cation transport protein	1419	up
ORF_2047	citrate lyase regulator	963	up
ORF_2046	malic enzyme, NAD-dependent	1161	up
ORF_2045	(citrate (pro-3S)-lyase) ligase	1056	up
ORF_2044	citrate lyase subunit gamma	291	up
ORF_2043	citrate lyase, beta chain	915	up
ORF_2042	citrate (pro-3S)-lyase	1539	up
ORF_2041	conserved hypothetical protein	123	up
ORF_2029	cytochrome D ubiquinol oxidase, subunit I	1440	up
ORF_2028	cytochrome D ubiquinol oxidase, subunit II	996	up
ORF_2027	cytochrome D ABC transporter, ATP-binding and permease protein	1734	up
ORF_2026	cytochrome D ABC transporter, ATP-binding and permease protein	1761	up
ORF_2025	ribosome recycling factor	135	up
ORF_2007	E1-E2 family cation-transporting ATPase	2340	up
ORF_1997	universal stress protein UspA family nucleotide-binding protein	441	up
ORF_1991	conserved hypothetical protein	564	up
ORF_1988	serine-type D-Ala-D-Ala carboxypeptidase	1176	up
ORF_1865	alpha-1,2-mannosidase (putative)	2148	up
ORF_1864	transcription regulator	1065	up
ORF_1863	conserved hypothetical protein	1290	up
ORF_1862	alpha-mannosidase (putative)	2700	up
ORF_1861	ROK family protein	879	up
ORF_1860	beta-glucosidase	1386	up
ORF_1859	alpha-glucosidase	1677	up
ORF_1858	sugar transport protein	1386	up
ORF_1857	transcription regulator	1008	up
ORF_1856	fructose-6-phosphate aldolase	171	up
ORF_1849	mannose-6-phosphate isomerase	1344	up
ORF_1830	L-rhamnose isomerase	1284	up
ORF_1825	transcription regulator (putative)	426	up
ORF_1824	pyruvate oxidase	1749	up
ORF_1823	lactate oxidase	1101	up
ORF_1821	ATP-dependent Clp protease, ATP-binding subunit ClpL	258	up
ORF_1820	nickase	2061	up
ORF_1817	conserved hypothetical protein	507	up
ORF_1816	DNA-damage-inducible protein	282	up
ORF_1815	Replication initiator protein	138	up
ORF_1814	conserved hypothetical protein	228	up
ORF_1813	copy number control protein	801	up
ORF_1812	hypothetical protein	204	up
ORF_1809	DNA topoisomerase	372	up
ORF_1808	putative uncharacterized protein	216	up
ORF_1807	putative LtrC	1125	up
ORF_1806	Lactate dehydrogenase-like 2-hydroxyacid dehydrogenase	960	up
ORF_1805	conserved hypothetical protein	387	up
ORF_1804	conserved hypothetical protein	321	up
ORF_1803	ImpB/MucB/SamB family protein	1317	up
ORF_1802	conserved hypothetical protein	363	up
ORF_1801	putative type I site-specific deoxyribonuclease	1374	up
ORF_1800	conserved hypothetical protein	1527	up
ORF_1799	HsdS, type I site-specific deoxyribonuclease	1188	up
ORF_1798	HsdR family type I site-specific deoxyribonuclease	3138	up
ORF_1790	prophage Lp2 protein 13	258	up
ORF_1786	DnaD domain protein	933	up
ORF_1785	prophage Lp2 protein 21	288	up
ORF_1784	prophage Lp2 protein 23	519	up
ORF_1774	conserved hypothetical protein	207	up
ORF_1769	conserved hypothetical protein	333	up
ORF_1768	prophage protein	348	up
ORF_1767	prophage protein	552	up
ORF_1765	prophage major tail protein	471	up
ORF_1758	conserved hypothetical protein	123	up
ORF_1747	conserved hypothetical protein	186	up
ORF_1746	beta-lactamase	1032	up
ORF_1676	competence-damage protein	1263	up
ORF_1670	topoisomerase-like	306	up
ORF_1651	priming glycosyltransferase	678	up
ORF_1612	integral membrane protein	1212	up
ORF_1611	conserved hypothetical protein	585	up
ORF_1601	1-phosphofructokinase	918	up
ORF_1585	conserved hypothetical protein	408	up
ORF_1559	conserved hypothetical protein	366	up
ORF_1551	oxidoreductase	1395	up
ORF_1548	conserved hypothetical protein	312	up
ORF_1532	conserved hypothetical protein	783	up
ORF_1527	integral membrane protein	288	up
ORF_1526	conserved hypothetical protein	279	up
ORF_1517	dihydroorotase	1119	up
ORF_1516	conserved hypothetical protein	1095	up
ORF_1515	conserved hypothetical protein	267	up
ORF_1514	cellobiose PTS, EIIC	1278	up
ORF_1512	NADPH-dependent FMN reductase	672	up
ORF_1509	conserved hypothetical protein	324	up
ORF_1508	conserved hypothetical protein	555	up
ORF_1486	conserved hypothetical protein	264	up
ORF_1485	conserved hypothetical protein	348	up
ORF_1484	hypothetical protein	213	up
ORF_1469	nicking enzyme (TraA)-like	2064	up
ORF_1461	ATPase involved in chromosome partitioning	810	up
ORF_1460	conserved hypothetical protein	336	up
ORF_1455	replication-associated recombination protein A	1350	up
ORF_1424	integral membrane protein	717	up
ORF_1370	conserved hypothetical protein	1170	up
ORF_1340	conserved hypothetical protein	126	up
ORF_1326	excinuclease ABC, subunit A	2268	up
ORF_1324	conserved hypothetical protein	513	up
ORF_1323	transcription regulator	477	up
ORF_1283	hypothetical protein	1287	up
ORF_1282	hypothetical protein	114	up
ORF_1278	glycosyltransferase	1500	up
ORF_1194	metallo-beta-lactamase	744	up
ORF_1161	transcription regulator (putative)	471	up
ORF_1160	conserved hypothetical protein	1197	up
ORF_1155	extracellular zinc metalloproteinase	564	up
ORF_1144	conserved hypothetical protein	123	up
ORF_1143	biotin-(acetyl-CoA-carboxylase)ligase and biotin operon repressor	972	up
ORF_1142	integral membrane protein	564	up
ORF_1121	conserved hypothetical protein	429	up
ORF_1120	conserved hypothetical protein	411	up
ORF_1119	integral membrane protein	270	up
ORF_1118	NADH dehydrogenase	1203	up
ORF_1116	GNAT family acetyltransferase	444	up
ORF_1114	integral membrane protein	366	up
ORF_1100	oxidoreductase	921	up
ORF_1092	putative fructose-like phosphotransferase system subunit EIIA	444	up
ORF_1077	HAD superfamily hydrolase	819	up
ORF_1076	transketolase	1998	up
ORF_1067	galacitol PTS, EIIC	1272	up
ORF_1062	conserved hypothetical protein	399	up
ORF_1061	maltose O-acetyltransferase	561	up
ORF_1060	L-arabinose isomerase	1425	up
ORF_1059	L-ribulose-5-phosphate 4-epimerase	729	up
ORF_1058	L-ribulokinase (putative)	1602	up
ORF_1057	arabinose transport protein	1401	up
ORF_1049	conserved hypothetical protein	732	up
ORF_1035	ATP-dependent Clp protease, ATP-binding subunit ClpL	1626	up
ORF_1024	DNA-directed DNA polymerase IV	1134	up
ORF_1022	ATP-dependent RNA helicase	1344	up
ORF_1020	conserved hypothetical protein	270	up
ORF_1015	thioredoxin	312	up
ORF_0971	aldose 1-epimerase	1020	up
ORF_0970	transcription regulator	588	up
ORF_0947	cell surface protein	7947	up
ORF_0934	ATP-dependent Clp protease proteolytic subunit	591	up
ORF_0892	S-adenosyl-L-homocysteine hydrolase, NAD binding domain protein	1155	up
ORF_0891	HD domain protein	198	up
ORF_0885	transposase	690	up
ORF_0876	conserved hypothetical protein	447	up
ORF_0872	hypothetical protein	168	up
ORF_0869	ABC transporter, ATP-binding and permease protein	1764	up
ORF_0868	poly(glycerol-phosphate) alpha-glucosyltransferase	1578	up
ORF_0867	ABC transporter, ATP-binding and permease protein	1605	up
ORF_0866	ABC transporter, ATP-binding and permease protein	399	up
ORF_0847	conserved hypothetical protein	222	up
ORF_0841	conserved hypothetical protein	342	up
ORF_0813	transcription regulator	738	up
ORF_0812	extracellular protein	810	up
ORF_0811	cell surface protein precursor	1035	up
ORF_0810	extracellular protein	3408	up
ORF_0808	integral membrane protein (putative)	324	up
ORF_0807	transcription regulator (putative)	573	up
ORF_0806	RNase III regulator YmdB	519	up
ORF_0794	Na+/H+ antiporter NhaC	1401	up
ORF_0786	mannosyl-glycoprotein endo-beta-N-acetylglucosaminidase	2847	up
ORF_0785	maltose phosphorylase	2271	up
ORF_0784	multiple sugar ABC transporter, ATP-binding protein	1107	up
ORF_0783	alpha-amylase	1323	up
ORF_0782	maltodextrose utilization protein MalA	831	up
ORF_0781	maltose/maltodextrin ABC transporter, permease protein	885	up
ORF_0780	maltose/maltodextrin ABC transporter, permease protein	1290	up
ORF_0779	maltose ABC superfamily ATP binding cassette transporter, maltose-binding protein	1254	up
ORF_0762	conserved hypothetical protein	813	up
ORF_0761	conserved hypothetical protein	786	up
ORF_0760	conserved hypothetical protein	330	up
ORF_0752	extracellular protein	813	up
ORF_0751	conserved hypothetical protein	1695	up
ORF_0749	oxidoreductase	873	up
ORF_0745	transport protein	1233	up
ORF_0744	conserved hypothetical protein	444	up
ORF_0743	integral membrane protein	201	up
ORF_0742	integral membrane protein	171	up
ORF_0741	small heat shock protein	423	up
ORF_0740	transcription regulator (putative)	474	up
ORF_0729	purine-cytosine transport protein	1200	up
ORF_0728	thiamine-phosphate diphosphorylase	654	up
ORF_0727	phosphomethylpyrimidine kinase	825	up
ORF_0726	hydroxyethylthiazole kinase	792	up
ORF_0721	conserved hypothetical protein	792	up
ORF_0719	conserved hypothetical protein	1275	up
ORF_0713	adenylyl transferase (putative)	780	up
ORF_0711	conserved hypothetical protein	750	up
ORF_0703	negative regulator of proteolysis	423	up
ORF_0695	transcription regulator	486	up
ORF_0692	pyruvate oxidase	1740	up
ORF_0691	bifunctional protein: riboflavin kinase; FMN adenylyltransferase	849	up
ORF_0690	putative pyruvate oxidase	1761	up
ORF_0671	conserved hypothetical protein	252	up
ORF_0657	transcription regulator	453	up
ORF_0652	MutT/nudix family protein	438	up
ORF_0651	GroEL supressor protein SugE	315	up
ORF_0618	hypothetical protein	117	up
ORF_0616	lipoprotein	1011	up
ORF_0608	GY family cell surface protein	3783	up
ORF_0606	conserved hypothetical protein	495	up
ORF_0602	fumarate reductase, flavoprotein subunit precursor	1866	up
ORF_0600	transcription regulator	474	up
ORF_0599	acyl carrier protein phosphodiesterase	630	up
ORF_0594	conserved hypothetical protein	1233	up
ORF_0582	lipase/esterase	1017	up
ORF_0581	GPH family glycoside-pentoside-hexuronide:cation symporter	1401	up
ORF_0574	rep protein	954	up
ORF_0572	cell surface protein precursor (putative)	3225	up
ORF_0567	conserved hypothetical protein	138	up
ORF_0566	cellobiose PTS, EIIA	447	up
ORF_0565	cellobiose PTS, EIIB	327	up
ORF_0564	cellobiose PTS, EIIC	1473	up
ORF_0563	6-phospho-beta-glucosidase	1383	up
ORF_0558	integral membrane protein	594	up
ORF_0555	conserved hypothetical protein	525	up
ORF_0554	DNA-3-methyladenine glycosylase I	645	up
ORF_0553	diguanylate cyclase/phosphodiesterase domain 1 containing protein	1137	up
ORF_0552	conserved hypothetical protein	426	up
ORF_0551	DNA polymerase V subunit UmuC	1521	up
ORF_0550	transcription regulator	912	up
ORF_0529	1,3-propanediol dehydrogenase	1173	up
ORF_0528	aryl-alcohol dehydrogenase	1122	up
ORF_0518	cell surface protein precursor	426	up
ORF_0500	transcription regulator (putative)	567	up
ORF_0499	conserved hypothetical protein	186	up
ORF_0498	conserved hypothetical protein	762	up
ORF_0492	transcription regulator	435	up
ORF_0491	succinyl-diaminopimelate desuccinylase	1263	up
ORF_0490	ABC superfamily ATP binding cassette transporter, membrane protein	2577	up
ORF_0489	ABC superfamily ATP binding cassette transporter, ABC protein	702	up
ORF_0466	possible cystathionine beta-lyase	1191	up
ORF_0465	conserved hypothetical protein	867	up
ORF_0464	oxidoreductase	1029	up
ORF_0459	integral membrane protein	3960	up
ORF_0458	transcription regulator	621	up
ORF_0457	transcription regulator	330	up
ORF_0453	conserved hypothetical protein	831	up
ORF_0443	lipase/esterase (putative)	831	up
ORF_0439	PTS, EIIA	534	up
ORF_0403	extracellular protein	1509	up
ORF_0402	cell surface protein precursor (putative)	378	up
ORF_0401	cell surface protein precursor	1044	up
ORF_0400	extracellular protein	783	up
ORF_0383	integral membrane protein	564	up
ORF_0318	beta-glucosides PTS, EIIBCA	1848	up
ORF_0312	GY family cell surface protein	3570	up
ORF_0306	conserved hypothetical protein	162	up
ORF_0305	GTP-binding protein LepA	1788	up
ORF_0304	transcription regulator	663	up
ORF_0302	cell surface protein (putative)	2253	up
ORF_0282	RhaB1	1953	up
ORF_0276	XRE family transcriptional regulator	447	up
ORF_0264	FMN-binding protein	369	up
ORF_0251	integral membrane protein (putative)	372	up
ORF_0250	acetylesterase	792	up
ORF_0249	transcription regulator	732	up
ORF_0206	MFS family major facilitator transporter, multidrug:cation symporter MdtG	1224	up
ORF_0197	hypothetical protein	126	up
ORF_0196	copper transporting ATPase	2040	up
ORF_0195	choloylglycine hydrolase	987	up
ORF_0194	integral membrane protein	678	up
ORF_0193	integral membrane protein	699	up
ORF_0191	acetyltransferase	459	up
ORF_0190	oxidoreductase (putative)	639	up
ORF_0187	small heat shock protein	444	up
ORF_0184	A/G-specific adenine glycosylase (putative)	1101	up
ORF_0181	negative regulator of proteolysis	405	up
ORF_0180	transcription regulator	420	up
ORF_0179	conserved hypothetical protein	861	up
ORF_0171	extracellular protein	2151	up
ORF_0155	oxidoreductase	1005	up
ORF_0154	intracellular protease/amidase (putative)	675	up
ORF_0153	acetyltransferase	492	up
ORF_0152	transport protein	885	up
ORF_0151	conserved hypothetical protein	372	up
ORF_0150	conserved hypothetical protein	282	up
ORF_0148	acyl carrier protein phosphodiesterase (putative)	648	up
ORF_0141	choloylglycine hydrolase	1017	up
ORF_0139	conserved hypothetical protein	1536	up
ORF_0136	short-chain dehydrogenase/oxidoreductase	861	up
ORF_0134	conserved hypothetical protein	426	up
ORF_0132	cation transport protein	1416	up
ORF_0112	HAD superfamily hydrolase	768	up
ORF_0110	glycogen phosphorylase	2397	up
ORF_0106	1,4-alpha-glucan branching enzyme	1905	up
ORF_0070	Protein of hypothetical function DUF1706	510	up
ORF_0051	ATP-dependent Clp protease ATP-binding subunit ClpC	2220	up
ORF_0050	integrase/recombinase, fragment (putative)	561	up
ORF_0018	conserved hypothetical protein	549	up
ORF_3134	oxidoreductase	954	down
ORF_3133	transport protein	1221	down
ORF_3113	prenyltransferase	969	down
ORF_3077	conserved hypothetical protein	156	down
ORF_3028	conserved hypothetical protein	321	down
ORF_3005	(3R)-hydroxymyristoyl-[acyl carrier protein] dehydratase	444	down
ORF_3004	3-oxoacyl-(acyl carrier protein) synthase III	987	down
ORF_3003	acyl carrier protein	249	down
ORF_3002	(acyl-carrier protein) S-malonyltransferase	933	down
ORF_3001	3-oxoacyl-	723	down
ORF_3000	3-oxoacyl-(acyl-carrier protein) synthase II	1233	down
ORF_2999	acetyl-CoA carboxylase, biotin carboxyl carrier protein	462	down
ORF_2998	(3R)-hydroxymyristoyl-(acyl carrier protein) dehydratase	414	down
ORF_2997	acetyl-CoA carboxylase, biotin carboxylase subunit	1389	down
ORF_2996	acetyl-CoA carboxylase, carboxyl transferase subunit beta	843	down
ORF_2995	acetyl-CoA carboxylase, carboxyl transferase subunit alpha	771	down
ORF_2994	enoyl-(acyl carrier protein) reductase	759	down
ORF_2993	phosphopantetheinyltransferase	552	down
ORF_2992	integral membrane protein	726	down
ORF_2975	integral membrane protein	366	down
ORF_2973	integral membrane protein	249	down
ORF_2971	integral membrane protein	267	down
ORF_2965	4-oxalocrotonate tautomerase	195	down
ORF_2940	amino acid ABC transporter, ATP-binding protein	1068	down
ORF_2939	amino acid ABC transporter, permease protein	672	down
ORF_2938	amino acid ABC transporter, substrate binding protein	858	down
ORF_2929	methylase (putative)	342	down
ORF_2920	microcin immunity protein	969	down
ORF_2917	conserved hypothetical protein	141	down
ORF_2916	integral membrane protein	1080	down
ORF_2905	conserved hypothetical protein	1746	down
ORF_2852	tRNA:M(5)U-54 methyltransferase	1326	down
ORF_2825	DNA-binding protein II	276	down
ORF_2807	integral membrane protein	201	down
ORF_2800	ABC transporter, ATP-binding protein	942	down
ORF_2751	glycyl-tRNA synthetase subunit alpha	900	down
ORF_2745	conserved hypothetical protein	444	down
ORF_2744	30S ribosomal protein S21	189	down
ORF_2723	D-alanyl transfer protein DltD	1278	down
ORF_2722	D-alanine--poly(phosphoribitol) ligase subunit 2	237	down
ORF_2721	D-alanyl transfer protein DltB	1215	down
ORF_2720	D-alanine--D-alanyl carrier protein ligase	1527	down
ORF_2719	D-Ala-teichoic acid biosynthesis protein (putative)	150	down
ORF_2718	serine-type D-Ala-D-Ala carboxypeptidase	1176	down
ORF_2686	D-lactate dehydrogenase	999	down
ORF_2675	glycosyltransferase	942	down
ORF_2659	TetR family transcriptional regulator	651	down
ORF_2636	potassium uptake protein	2043	down
ORF_2629	adenylosuccinate lyase	1299	down
ORF_2585	conserved hypothetical protein	936	down
ORF_2573	nucleoside transport protein	1284	down
ORF_2568	conserved hypothetical protein	192	down
ORF_2564	peptidyl-prolyl cis-trans isomerase	930	down
ORF_2560	serine-type D-Ala-D-Ala carboxypeptidase	1335	down
ORF_2558	branched-chain amino acid transport protein	765	down
ORF_2557	integral membrane protein	351	down
ORF_2428	methionine--tRNA ligase	2052	down
ORF_2427	drug resistance transporter	1185	down
ORF_2414	purine operon repressor	837	down
ORF_2413	UDP-N-acetylglucosamine pyrophosphorylase	1383	down
ORF_2393	UDP-N-acetylglucosamine 1-carboxyvinyltransferase	1281	down
ORF_2392	transcription termination factor Rho	1293	down
ORF_2391	ribosomal protein L31	246	down
ORF_2373	flavodoxin	447	down
ORF_2372	conserved hypothetical protein	2148	down
ORF_2348	cell-cycle regulation histidine triad protein	369	down
ORF_2344	cof family hydrolase	798	down
ORF_2341	integral membrane protein (putative)	318	down
ORF_2339	conserved hypothetical protein	501	down
ORF_2335	teichoic acid glycosylation protein	417	down
ORF_2302	xanthine/uracil permease	1251	down
ORF_2299	purine transport regulator	1590	down
ORF_2218	purine nucleosidase	957	down
ORF_2213	thioredoxin reductase (NADPH)	996	down
ORF_2200	conserved hypothetical protein	348	down
ORF_2199	MIT family Mg2+ and Co2+ transporter	909	down
ORF_2178	holo-	363	down
ORF_2177	alanine racemase	1128	down
ORF_2173	NMT1/THI5 like protein	1053	down
ORF_2151	conserved hypothetical protein	540	down
ORF_2131	cold shock protein CspC	201	down
ORF_2128	transcription regulator	1038	down
ORF_2127	phosphatase (putative)	663	down
ORF_2126	lipase/esterase (putative)	795	down
ORF_2117	seryl-tRNA synthetase	1278	down
ORF_2116	conserved hypothetical protein	129	down
ORF_2108	30S ribosomal protein S7	471	down
ORF_2105	50S ribosomal protein L3	630	down
ORF_2103	50S ribosomal protein L23	294	down
ORF_2102	50S ribosomal protein L2	840	down
ORF_2094	ribosomal protein L24	312	down
ORF_2093	50S ribosomal protein L5	543	down
ORF_2092	30S ribosomal protein S8	396	down
ORF_2091	50S ribosomal protein L6	537	down
ORF_2090	ribosomal protein L18	357	down
ORF_2087	ribosomal protein L15	432	down
ORF_2086	preprotein translocase subunit SecY	1134	down
ORF_2067	30S ribosomal protein S9	393	down
ORF_2035	malate dehydrogenase	1644	down
ORF_2034	malate transport protein	972	down
ORF_2001	cold shock protein CspP	201	down
ORF_1993	conserved hypothetical protein	441	down
ORF_1985	glycerol uptake facilitator protein	717	down
ORF_1975	mannose PTS, EIIAB	975	down
ORF_1974	mannose PTS, EIIC	807	down
ORF_1973	PTS family mannose/fructose/sorbose porter component IID	933	down
ORF_1962	malate transport protein	963	down
ORF_1961	transport protein	1026	down
ORF_1960	phosphoglycerate mutase	678	down
ORF_1959	extracellular zinc metalloproteinase	627	down
ORF_1957	ribose-5-phosphate isomerase A	684	down
ORF_1951	glutamyl-tRNA synthetase	1491	down
ORF_1944	preprotein translocase subunit SecE	186	down
ORF_1941	50S ribosomal protein L11	426	down
ORF_1940	50S ribosomal protein L1	690	down
ORF_1939	ribosomal protein L10	504	down
ORF_1938	ribosomal protein L7/L12	369	down
ORF_1935	Lysyl-tRNA synthetase (class II)	2604	down
ORF_1930	16S RNA methylase	609	down
ORF_1918	UDP-glucose 4-epimerase	996	down
ORF_1916	phosphonoacetaldehyde hydrolase	798	down
ORF_1899	p-coumaric acid decarboxylase	537	down
ORF_1898	regulator of phenolic acid metabolism PadR	546	down
ORF_1897	conserved hypothetical protein	462	down
ORF_1892	xylose isomerase	1350	down
ORF_1889	ribokinase	921	down
ORF_1888	D-ribose pyranase	396	down
ORF_1887	putative ribose uptake protein rbsU	885	down
ORF_1822	conserved hypothetical protein	234	down
ORF_1748	branched-chain amino acid aminotransferase	1029	down
ORF_1734	F0F1 ATP synthase subunit A	714	down
ORF_1733	F0F1 ATP synthase subunit C	213	down
ORF_1732	F0F1 ATP synthase subunit B	516	down
ORF_1731	F0F1 ATP synthase subunit delta	546	down
ORF_1730	F0F1 ATP synthase subunit alpha	1521	down
ORF_1729	F0F1 ATP synthase subunit gamma	945	down
ORF_1728	F0F1 ATP synthase subunit beta	1404	down
ORF_1727	F0F1 ATP synthase subunit epsilon	429	down
ORF_1726	UDP-N-acetylglucosamine 1-carboxyvinyltransferase	1317	down
ORF_1725	ribosomal protein acetylating enzyme	555	down
ORF_1690	cell shape determining protein MreB	1005	down
ORF_1685	glutamine ABC transporter, permease protein	642	down
ORF_1682	aspartate kinase	1353	down
ORF_1640	possible acetyltransferase	444	down
ORF_1639	lipoprotein precursor, peptide binding protein OppA-like protein	1662	down
ORF_1630	reductase (putative)	540	down
ORF_1629	purine nucleosidase	981	down
ORF_1628	integral membrane protein	552	down
ORF_1604	conserved hypothetical protein	285	down
ORF_1574	30S ribosomal protein S20	255	down
ORF_1547	cellobiose PTS, EIIC	1326	down
ORF_1523	cysteine synthase	912	down
ORF_1522	cystathionine beta-lyase	1146	down
ORF_1521	serine O-acetyltransferase	543	down
ORF_1505	mannitol-1-phosphate 5-dehydrogenase	1158	down
ORF_1504	mannitol PTS, EIIA	450	down
ORF_1503	transcription regulator	2076	down
ORF_1502	mannitol PTS, EIICB	1839	down
ORF_1431	threonine-tRNA ligase 1	1965	down
ORF_1403	peptidylprolyl isomerase	897	down
ORF_1392	conserved hypothetical protein	561	down
ORF_1377	conserved hypothetical protein	441	down
ORF_1376	conserved hypothetical protein	561	down
ORF_1375	fumarate reductase, flavoprotein subunit precursor	2439	down
ORF_1374	oxidoreductase (putative)	615	down
ORF_1345	arginine--tRNA ligase	1689	down
ORF_1335	sulfate adenylyltransferase	1176	down
ORF_1303	deoxyguanosine kinase	648	down
ORF_1259	peptide deformylase	567	down
ORF_1253	extracellular protein, gamma-D-glutamate-meso-diaminopimelate muropeptidase (putative)	1491	down
ORF_1231	isoleucyl-tRNA synthetase	2799	down
ORF_1219	cell division protein FtsL	387	down
ORF_1217	cell division protein MraZ	438	down
ORF_1214	hypothetical protein	120	down
ORF_1209	conserved hypothetical protein	126	down
ORF_1208	rRNA large subunit methyltransferase A	855	down
ORF_1153	L-2-hydroxyisocaproate dehydrogenase	960	down
ORF_1152	AMT family ammonium or ammonia transporter	1263	down
ORF_1139	conserved hypothetical protein	201	down
ORF_1138	conserved hypothetical protein	903	down
ORF_1098	formate acetyltransferase activating enzyme	687	down
ORF_1097	formate C-acetyltransferase	2259	down
ORF_1085	6-phospho-beta-glucosidase	1464	down
ORF_1084	beta-glucosides PTS, EIIBCA	2001	down
ORF_1055	transcription regulator	822	down
ORF_1038	response regulator; accesory gene regulator protein A	744	down
ORF_1037	accessory gene regulator protein C	1263	down
ORF_1036	accesory gene regulator protein B	603	down
ORF_1003	Xaa-Pro dipeptidase	1110	down
ORF_0979	peptidylprolyl isomerase	585	down
ORF_0969	HAD superfamily hydrolase	816	down
ORF_0965	phosphoglucosamine mutase	1356	down
ORF_0964	conserved hypothetical protein	978	down
ORF_0963	protein of hypothetical function DUF147	843	down
ORF_0949	glutamine ABC transporter, ATP-binding protein	735	down
ORF_0948	glutamine ABC superfamily ATP binding cassette transporter, substrate binding and permease protein	1437	down
ORF_0932	lipoprotein precursor, peptide binding protein OppA-like protein	1653	down
ORF_0919	hypothetical protein	141	down
ORF_0904	hypothetical protein	162	down
ORF_0903	Hin-like DNA-binding protein	288	down
ORF_0902	amino acid permease-associated region	1386	down
ORF_0901	APC family amino acid-polyamine-organocation transporter	213	down
ORF_0864	glucose-6-phosphate isomerase	1353	down
ORF_0863	sugar transport protein	858	down
ORF_0859	conserved hypothetical protein	1344	down
ORF_0858	unknown	270	down
ORF_0840	PTS family N-acetylglucosamine porter, IIABC component	1989	down
ORF_0835	homoserine O-succinyltransferase	876	down
ORF_0797	conserved hypothetical protein	474	down
ORF_0789	sucrose PTS, EIIBCA	1956	down
ORF_0775	glycerol uptake facilitator protein	708	down
ORF_0774	conserved hypothetical protein	369	down
ORF_0773	dihydroxyacetone kinase phosphatase domain-containing protein	582	down
ORF_0772	glycerone kinase	999	down
ORF_0739	oxidoreductase (putative)	603	down
ORF_0733	amino acid transport protein	1365	down
ORF_0714	conserved hypothetical protein	234	down
ORF_0683	amino acid permease	1398	down
ORF_0669	ABC superfamily ATP binding cassette transporter, ABC protein	741	down
ORF_0650	phosphoglycerate mutase	678	down
ORF_0642	bifunctional GMP synthase/glutamine amidotransferase protein	1557	down
ORF_0641	conserved hypothetical protein	153	down
ORF_0580	UDP-N-acetylmuramoylalanyl-D-glutamate--2,6-diami nopimelate ligase	1482	down
ORF_0579	aspartate kinase I	1203	down
ORF_0535	short chain dehydrogenase/reductase family oxidoreductase	891	down
ORF_0483	integral membrane protein	468	down
ORF_0481	integral membrane protein	252	down
ORF_0480	conserved hypothetical protein	306	down
ORF_0479	phosphoglycerate mutase (putative)	639	down
ORF_0471	maltose O-acetyltransferase	570	down
ORF_0423	integral membrane protein	972	down
ORF_0419	possible toxin regulator	1095	down
ORF_0382	prophage Lp2 protein 56, lysin	933	down
ORF_0381	conserved hypothetical protein	285	down
ORF_0380	conserved hypothetical protein	273	down
ORF_0379	conserved hypothetical protein	378	down
ORF_0377	conserved hypothetical protein	483	down
ORF_0376	reticulocyte binding protein	4947	down
ORF_0375	putative uncharacterized protein	822	down
ORF_0374	phage tail tape measure protein	4545	down
ORF_0373	hypothetical protein	222	down
ORF_0372	putative uncharacterized protein	315	down
ORF_0371	putative major tail protein	612	down
ORF_0370	gp10 protein	423	down
ORF_0369	gp9 protein	408	down
ORF_0368	Gp8 protein	213	down
ORF_0367	putative uncharacterized protein	306	down
ORF_0366	major head protein Cps	1179	down
ORF_0365	Clp protease domain protein	753	down
ORF_0364	phage portal protein, HK97 family	1143	down
ORF_0363	terminase	1680	down
ORF_0362	putative uncharacterized protein	243	down
ORF_0361	hypothetical protein	228	down
ORF_0360	conserved hypothetical protein	216	down
ORF_0359	hypothetical protein	171	down
ORF_0358	hypothetical protein	681	down
ORF_0310	fumarate reductase	1482	down
ORF_0292	ferrichrome ABC transporter, permease protein	996	down
ORF_0291	ferrichrome ABC transporter, permease protein	999	down
ORF_0275	galactose operon repressor	1002	down
ORF_0274	UDP-glucose--hexose-1-phosphate uridylyltransferase	1464	down
ORF_0273	UDP-glucose 4-epimerase	1005	down
ORF_0272	galactokinase	1164	down
ORF_0271	beta-galactosidase large subunit	1881	down
ORF_0270	beta-galactosidase, small subunit	960	down
ORF_0269	alpha-galactosidase	2217	down
ORF_0268	sugar transport protein	1959	down
ORF_0267	aldose 1-epimerase	1035	down
ORF_0266	galactose operon repressor	996	down
ORF_0234	transport protein	822	down
ORF_0229	nicotinate phosphoribosyltransferase	1479	down
ORF_0228	NAD synthetase	828	down
ORF_0211	tyrosine--tRNA ligase	240	down
ORF_0166	transcription regulator (putative)	588	down
ORF_0160	conserved hypothetical protein	168	down
ORF_0117	conserved hypothetical protein	225	down
ORF_0116	cold shock protein CspA	201	down
ORF_0104	lipoprotein precursor, peptide binding protein OppA-like protein	1596	down
ORF_0081	extracellular protein	738	down
ORF_0071	IS transposase	213	down
ORF_0060	conserved hypothetical protein	237	down
ORF_0059	aromatic amino acid aminotransferase	1188	down
ORF_0049	transcription regulator (putative)	390	down
ORF_0048	oligopeptide ABC transporter, ATP-binding protein	966	down
ORF_0047	oligopeptide ABC transporter, ATP-binding protein	1080	down
ORF_0046	oligopeptide ABC transporter, permease protein	1035	down
ORF_0045	oligopeptide ABC transporter, permease protein	930	down
ORF_0044	oligopeptide ABC superfamily ATP binding cassette transporter, binding protein	1506	down
ORF_0043	hypothetical protein	150	down
ORF_0033	6-phosphogluconate dehydrogenase family protein	897	down
ORF_0032	gluconokinase	1515	down
ORF_0031	gluconate transport protein	1356	down
ORF_0030	glycerol-3-phosphate cytidylyltransferase	399	down
ORF_0029	transport protein	1194	down
ORF_0028	L-2-hydroxyisocaproate dehydrogenase	927	down
ORF_0007	conserved hypothetical protein	375	down

## Sheet: FS24h_PC24h
Gene	Product	Length
ORF_0005	prophage Lp2 protein 2, integrase	1122	up
ORF_0007	conserved hypothetical protein	375	up
ORF_0008	conserved hypothetical protein	126	up
ORF_0009	conserved hypothetical protein	792	up
ORF_0028	L-2-hydroxyisocaproate dehydrogenase	927	up
ORF_0031	gluconate transport protein	1356	up
ORF_0032	gluconokinase	1515	up
ORF_0033	6-phosphogluconate dehydrogenase family protein	897	up
ORF_0035	peptide chain release factor 3	1578	up
ORF_0043	hypothetical protein	150	up
ORF_0044	oligopeptide ABC superfamily ATP binding cassette transporter, binding protein	1506	up
ORF_0045	oligopeptide ABC transporter, permease protein	930	up
ORF_0046	oligopeptide ABC transporter, permease protein	1035	up
ORF_0047	oligopeptide ABC transporter, ATP-binding protein	1080	up
ORF_0048	oligopeptide ABC transporter, ATP-binding protein	966	up
ORF_0055	glycosyltransferase	1179	up
ORF_0056	glycosyltransferase	1023	up
ORF_0057	integral membrane protein	1056	up
ORF_0058	serine-type D-Ala-D-Ala carboxypeptidase	1239	up
ORF_0059	aromatic amino acid aminotransferase	1188	up
ORF_0063	conserved hypothetical protein	828	up
ORF_0064	conserved hypothetical protein	372	up
ORF_0065	probable transcriptional regulator	213	up
ORF_0071	IS transposase	213	up
ORF_0082	tRNA uridine 5-carboxymethylaminomethyl modification enzyme GidA	1911	up
ORF_0083	tRNA modification GTPase TrmE	1392	up
ORF_0085	cell division protein	711	up
ORF_0086	hypothetical protein	141	up
ORF_0087	ribonuclease P	345	up
ORF_0088	conserved hypothetical protein	138	up
ORF_0092	recombination protein F	1125	up
ORF_0093	DNA gyrase, B subunit	1947	up
ORF_0094	DNA gyrase, A subunit	2562	up
ORF_0095	30S ribosomal protein S6	300	up
ORF_0096	single-stranded DNA-binding protein (SSB) (Helix-destabilizing protein)	603	up
ORF_0097	30S ribosomal protein S18	237	up
ORF_0104	lipoprotein precursor, peptide binding protein OppA-like protein	1596	up
ORF_0116	cold shock protein CspA	201	up
ORF_0117	conserved hypothetical protein	225	up
ORF_0126	aldehyde dehydrogenase	1428	up
ORF_0131	fumarate reductase, flavoprotein subunit precursor	2370	up
ORF_0140	beta-phosphoglucomutase	672	up
ORF_0141	choloylglycine hydrolase	1017	up
ORF_0144	4-hydroxyphenylacetate-3-hydroxylase	1437	up
ORF_0145	conserved hypothetical protein	450	up
ORF_0146	conserved hypothetical protein	624	up
ORF_0154	intracellular protease/amidase (putative)	675	up
ORF_0155	oxidoreductase	1005	up
ORF_0160	conserved hypothetical protein	168	up
ORF_0172	NADH oxidase	1353	up
ORF_0174	conserved hypothetical protein	306	up
ORF_0175	Na+/H+ antiporter NhaC	1425	up
ORF_0195	choloylglycine hydrolase	987	up
ORF_0196	copper transporting ATPase	2040	up
ORF_0197	hypothetical protein	126	up
ORF_0198	transcription regulator	429	up
ORF_0206	MFS family major facilitator transporter, multidrug:cation symporter MdtG	1224	up
ORF_0207	cell surface hydrolase	939	up
ORF_0208	conserved hypothetical protein	471	up
ORF_0211	tyrosine--tRNA ligase	240	up
ORF_0239	conserved hypothetical protein	834	up
ORF_0240	di-/tripeptide transport protein	1473	up
ORF_0242	transcription antiterminator	846	up
ORF_0243	beta-glucosides PTS, EIIBCA	1875	up
ORF_0244	6-phospho-beta-glucosidase	1461	up
ORF_0253	transcription regulator	906	up
ORF_0265	oxidoreductase	1023	up
ORF_0266	galactose operon repressor	996	up
ORF_0267	aldose 1-epimerase	1035	up
ORF_0268	sugar transport protein	1959	up
ORF_0269	alpha-galactosidase	2217	up
ORF_0270	beta-galactosidase, small subunit	960	up
ORF_0271	beta-galactosidase large subunit	1881	up
ORF_0272	galactokinase	1164	up
ORF_0273	UDP-glucose 4-epimerase	1005	up
ORF_0274	UDP-glucose--hexose-1-phosphate uridylyltransferase	1464	up
ORF_0275	galactose operon repressor	1002	up
ORF_0283	transcription regulator of beta-galactosidase gene	1011	up
ORF_0286	branched-chain amino acid transport protein	540	up
ORF_0287	branched-chain amino acid transport protein	303	up
ORF_0288	transcription regulator	600	up
ORF_0291	ferrichrome ABC transporter, permease protein	999	up
ORF_0292	ferrichrome ABC transporter, permease protein	996	up
ORF_0310	fumarate reductase	1482	up
ORF_0316	transcription antiterminator	834	up
ORF_0317	6-phospho-beta-glucosidase	1452	up
ORF_0318	beta-glucosides PTS, EIIBCA	1848	up
ORF_0324	integral membrane protein (putative)	1266	up
ORF_0329	multidrug transport protein (putative)	1416	up
ORF_0331	conserved hypothetical protein	1080	up
ORF_0332	conserved hypothetical protein	564	up
ORF_0333	prophage Lp4 protein 1, integrase	1158	up
ORF_0334	conserved hypothetical protein	669	up
ORF_0335	conserved hypothetical protein	669	up
ORF_0336	prophage Lp2 protein 8	432	up
ORF_0337	prophage Lp1 protein 8	378	up
ORF_0338	conserved hypothetical protein	210	up
ORF_0339	conserved hypothetical protein	273	up
ORF_0340	Gp40 protein	450	up
ORF_0341	conserved hypothetical protein	141	up
ORF_0342	hypothetical protein	171	up
ORF_0343	hypothetical protein	168	up
ORF_0344	conserved hypothetical protein	252	up
ORF_0345	conserved hypothetical protein	480	up
ORF_0346	Helicase-like protein:Type III restriction enzyme, res subunit:DEAD/DEAH box helicase-like protein	1260	up
ORF_0347	phage NTP-binding protein	717	up
ORF_0348	conserved hypothetical protein	600	up
ORF_0349	conserved hypothetical protein	555	up
ORF_0350	prophage Lp3 protein 7	795	up
ORF_0351	prophage Lp3 protein 8, helicase	1275	up
ORF_0352	phage protein	333	up
ORF_0353	conserved hypothetical protein	225	up
ORF_0354	prophage Lp1 protein 30	357	up
ORF_0355	hypothetical protein	435	up
ORF_0359	hypothetical protein	171	up
ORF_0360	conserved hypothetical protein	216	up
ORF_0361	hypothetical protein	228	up
ORF_0362	putative uncharacterized protein	243	up
ORF_0363	terminase	1680	up
ORF_0364	phage portal protein, HK97 family	1143	up
ORF_0365	Clp protease domain protein	753	up
ORF_0366	major head protein Cps	1179	up
ORF_0367	putative uncharacterized protein	306	up
ORF_0368	Gp8 protein	213	up
ORF_0369	gp9 protein	408	up
ORF_0370	gp10 protein	423	up
ORF_0371	putative major tail protein	612	up
ORF_0372	putative uncharacterized protein	315	up
ORF_0373	hypothetical protein	222	up
ORF_0374	phage tail tape measure protein	4545	up
ORF_0375	putative uncharacterized protein	822	up
ORF_0376	reticulocyte binding protein	4947	up
ORF_0377	conserved hypothetical protein	483	up
ORF_0378	conserved hypothetical protein	435	up
ORF_0379	conserved hypothetical protein	378	up
ORF_0380	conserved hypothetical protein	273	up
ORF_0381	conserved hypothetical protein	285	up
ORF_0382	prophage Lp2 protein 56, lysin	933	up
ORF_0387	conserved hypothetical protein	432	up
ORF_0388	manganese transport protein	1593	up
ORF_0394	branched-chain amino acid ABC transporter, substrate binding protein	1194	up
ORF_0419	possible toxin regulator	1095	up
ORF_0423	integral membrane protein	972	up
ORF_0424	conserved hypothetical protein	1449	up
ORF_0452	CAAX family protease	1206	up
ORF_0453	conserved hypothetical protein	831	up
ORF_0471	maltose O-acetyltransferase	570	up
ORF_0496	ABC transporter, permease protein (putative)	1218	up
ORF_0497	ABC superfamily ATP binding cassette transporter, ABC protein	900	up
ORF_0500	transcription regulator (putative)	567	up
ORF_0525	copper-exporting ATPase	375	up
ORF_0526	copper-exporting ATPase	270	up
ORF_0527	P-ATPase superfamily P-type ATPase copper transporter	1866	up
ORF_0530	extracellular protein	396	up
ORF_0554	DNA-3-methyladenine glycosylase I	645	up
ORF_0555	conserved hypothetical protein	525	up
ORF_0559	extracellular protein	663	up
ORF_0560	extracellular protein	615	up
ORF_0563	6-phospho-beta-glucosidase	1383	up
ORF_0564	cellobiose PTS, EIIC	1473	up
ORF_0565	cellobiose PTS, EIIB	327	up
ORF_0577	integral membrane protein	327	up
ORF_0594	conserved hypothetical protein	1233	up
ORF_0596	conserved hypothetical protein	135	up
ORF_0597	aspartate--ammonia ligase	1008	up
ORF_0598	asparaginyl-tRNA synthetase	1296	up
ORF_0599	acyl carrier protein phosphodiesterase	630	up
ORF_0659	transcription regulator	441	up
ORF_0664	transcription antiterminator	843	up
ORF_0665	PTS, EIIA	492	up
ORF_0673	aspartate transaminase	1275	up
ORF_0683	amino acid permease	1398	up
ORF_0684	transposase	303	up
ORF_0689	prolyl aminopeptidase	930	up
ORF_0691	bifunctional protein: riboflavin kinase; FMN adenylyltransferase	849	up
ORF_0692	pyruvate oxidase	1740	up
ORF_0706	hypothetical protein	135	up
ORF_0714	conserved hypothetical protein	234	up
ORF_0715	cobalt ABC transporter, ATP-binding protein (putative)	732	up
ORF_0732	NTP pyrophosphohydrolase	471	up
ORF_0733	amino acid transport protein	1365	up
ORF_0753	conserved hypothetical protein	1518	up
ORF_0755	ABC transporter, permease protein	840	up
ORF_0756	ABC superfamily ATP binding cassette transporter, ABC protein	1701	up
ORF_0757	conserved hypothetical protein	561	up
ORF_0758	conserved hypothetical protein	129	up
ORF_0760	conserved hypothetical protein	330	up
ORF_0762	conserved hypothetical protein	813	up
ORF_0772	glycerone kinase	999	up
ORF_0773	dihydroxyacetone kinase phosphatase domain-containing protein	582	up
ORF_0774	conserved hypothetical protein	369	up
ORF_0775	glycerol uptake facilitator protein	708	up
ORF_0776	maltose operon transcriptional repressor	1020	up
ORF_0777	transcription regulator	963	up
ORF_0778	alpha-glucosidase	1674	up
ORF_0779	maltose ABC superfamily ATP binding cassette transporter, maltose-binding protein	1254	up
ORF_0780	maltose/maltodextrin ABC transporter, permease protein	1290	up
ORF_0781	maltose/maltodextrin ABC transporter, permease protein	885	up
ORF_0782	maltodextrose utilization protein MalA	831	up
ORF_0783	alpha-amylase	1323	up
ORF_0784	multiple sugar ABC transporter, ATP-binding protein	1107	up
ORF_0785	maltose phosphorylase	2271	up
ORF_0788	fructokinase	867	up
ORF_0789	sucrose PTS, EIIBCA	1956	up
ORF_0790	beta-fructofuranosidase	1506	up
ORF_0791	sucrose operon repressor	981	up
ORF_0792	alpha-glucosidase	1677	up
ORF_0794	Na+/H+ antiporter NhaC	1401	up
ORF_0799	2,3-cyclic-nucleotide 2-phosphodiesterase, putative	1551	up
ORF_0816	phosphoenolpyruvate carboxykinase (ATP)	1662	up
ORF_0819	extracellular protein, gamma-D-glutamate-meso-diaminopimelate muropeptidase (putative)	1068	up
ORF_0830	NADH peroxidase	1356	up
ORF_0835	homoserine O-succinyltransferase	876	up
ORF_0836	O-acetylhomoserine (thiol)-lyase	1287	up
ORF_0839	2-dehydropantoate 2-reductase	975	up
ORF_0842	ring-cleaving dioxygenase (putative)	450	up
ORF_0848	transcription regulator, AsnC-type	465	up
ORF_0863	sugar transport protein	858	up
ORF_0880	glycerol kinase	1518	up
ORF_0881	glycerol-3-phosphate dehydrogenase	1830	up
ORF_0882	glycerol uptake facilitator protein	720	up
ORF_0889	ribonucleoside-diphosphate reductase beta subunit	951	up
ORF_0897	conserved hypothetical protein	861	up
ORF_0898	amino acid ABC transporter, permease protein	678	up
ORF_0899	ABC superfamily ATP binding cassette transporter, binding protein	1077	up
ORF_0900	GAF domain protein	480	up
ORF_0901	APC family amino acid-polyamine-organocation transporter	213	up
ORF_0902	amino acid permease-associated region	1386	up
ORF_0903	Hin-like DNA-binding protein	288	up
ORF_0904	hypothetical protein	162	up
ORF_0905	hypothetical protein	129	up
ORF_0907	hypothetical protein	198	up
ORF_0908	hypothetical protein	132	up
ORF_0909	conserved hypothetical protein	159	up
ORF_0932	lipoprotein precursor, peptide binding protein OppA-like protein	1653	up
ORF_0936	central glycolytic genes regulator	1032	up
ORF_0942	chloride channel protein	1554	up
ORF_0967	D-fructose-6-phosphate amidotransferase	1818	up
ORF_0975	conserved hypothetical protein	837	up
ORF_0976	conserved hypothetical protein	330	up
ORF_0980	integral membrane protein	657	up
ORF_1001	catabolite control protein A	1011	up
ORF_1021	alanine--tRNA ligase	2643	up
ORF_1036	accesory gene regulator protein B	603	up
ORF_1037	accessory gene regulator protein C	1263	up
ORF_1038	response regulator; accesory gene regulator protein A	744	up
ORF_1048	sugar kinase and transcription regulator	864	up
ORF_1049	conserved hypothetical protein	732	up
ORF_1063	putative phosphoketolase	2391	up
ORF_1064	transcription regulator	768	up
ORF_1065	galacitol PTS, EIIA	471	up
ORF_1066	galactitol PTS, EIIB	297	up
ORF_1067	galacitol PTS, EIIC	1272	up
ORF_1068	L-iditol 2-dehydrogenase	1110	up
ORF_1069	BglG family transcriptional antiterminator	1479	up
ORF_1070	PTS system, enzyme IIA component	432	up
ORF_1079	alpha-glucosidase	2301	up
ORF_1080	sugar transport protein	1422	up
ORF_1083	transcription antiterminator	849	up
ORF_1084	beta-glucosides PTS, EIIBCA	2001	up
ORF_1085	6-phospho-beta-glucosidase	1464	up
ORF_1086	6-phospho-beta-glucosidase	1443	up
ORF_1089	PTS family porter, enzyme I	1497	up
ORF_1095	integral membrane protein	516	up
ORF_1097	formate C-acetyltransferase	2259	up
ORF_1098	formate acetyltransferase activating enzyme	687	up
ORF_1108	extracellular protein	804	up
ORF_1109	extracellular protein	639	up
ORF_1110	glycine cleavage system	375	up
ORF_1112	conserved hypothetical protein	717	up
ORF_1115	acetate kinase	1197	up
ORF_1122	spermidine/putrescine ABC transporter, substrate binding protein	1071	up
ORF_1135	fructose-bisphosphate aldolase	864	up
ORF_1137	sugar transport protein	1317	up
ORF_1138	conserved hypothetical protein	903	up
ORF_1139	conserved hypothetical protein	201	up
ORF_1152	AMT family ammonium or ammonia transporter	1263	up
ORF_1153	L-2-hydroxyisocaproate dehydrogenase	960	up
ORF_1169	conserved hypothetical protein	501	up
ORF_1175	putative uncharacterized protein	945	up
ORF_1177	methylated-DNA--	501	up
ORF_1179	ATP-dependent RNA helicase	1467	up
ORF_1181	type III restriction protein res subunit	1377	up
ORF_1182	hypothetical protein	174	up
ORF_1183	conserved hypothetical protein	2016	up
ORF_1184	hypothetical protein	465	up
ORF_1185	conserved hypothetical protein	120	up
ORF_1187	serine O-acetyltransferase	177	up
ORF_1188	Glycosyltransferases involved in cell wall biogenesis	981	up
ORF_1190	conserved hypothetical protein	1125	up
ORF_1191	alpha-D-GlcNAc alpha-1,2-L-rhamnosyltransferase	228	up
ORF_1192	IS30 family transposase	921	up
ORF_1195	negative regulator of proteolysis	399	up
ORF_1208	rRNA large subunit methyltransferase A	855	up
ORF_1209	conserved hypothetical protein	126	up
ORF_1231	isoleucyl-tRNA synthetase	2799	up
ORF_1253	extracellular protein, gamma-D-glutamate-meso-diaminopimelate muropeptidase (putative)	1491	up
ORF_1260	pyruvate dehydrogenase complex, E1 component, alpha subunit	1113	up
ORF_1261	pyruvate dehydrogenase complex, E1 component, beta subunit	732	up
ORF_1262	pyruvate dehydrogenase complex dihydrolipoamide acetyltransferase	1317	up
ORF_1263	dihydrolipoamide dehydrogenase	1413	up
ORF_1267	GTP-binding protein TypA	1839	up
ORF_1276	amino acid transport protein	1383	up
ORF_1277	homocysteine methyltransferase	930	up
ORF_1281	multidrug transport protein	1503	up
ORF_1292	leucyl-tRNA synthetase	2427	up
ORF_1320	extracellular protein, membrane-anchored (putative)	339	up
ORF_1333	5-methyltetrahydropteroyltriglutamate--homocysteine S-methyltransferase	2307	up
ORF_1345	arginine--tRNA ligase	1689	up
ORF_1363	arginine catabolic regulator	462	up
ORF_1377	conserved hypothetical protein	441	up
ORF_1414	conserved hypothetical protein	165	up
ORF_1415	FeoB family ferrous iron (Fe2+) uptake protein	1989	up
ORF_1416	conserved hypothetical protein	225	up
ORF_1431	threonine-tRNA ligase 1	1965	up
ORF_1432	translation initiation factor IF-3	501	up
ORF_1433	ribosomal protein L35	195	up
ORF_1434	50S ribosomal protein L20	357	up
ORF_1451	hypothetical protein	117	up
ORF_1458	hypothetical protein	228	up
ORF_1459	hypothetical protein	204	up
ORF_1460	conserved hypothetical protein	336	up
ORF_1461	ATPase involved in chromosome partitioning	810	up
ORF_1462	hypothetical protein	114	up
ORF_1463	plasmid replication initiation protein	405	up
ORF_1470	conserved hypothetical protein	252	up
ORF_1474	putative glycosyl transferase	960	up
ORF_1475	putative lipopolysaccharide biosynthesis protein	1428	up
ORF_1476	capsular polysaccharide biosynthesis protein CpsI	1020	up
ORF_1477	CDP-glycerol:poly(glycerophosphate) glycerophosphotransferase	1194	up
ORF_1478	EpsIIN, glycerol-3-phosphate cytidylyltransferase	375	up
ORF_1479	Transposase	132	up
ORF_1480	glycosyl transferase, group 2 family	258	up
ORF_1487	acetate kinase	1188	up
ORF_1490	integral membrane protein	384	up
ORF_1494	ABC transporter subunit (putative)	570	up
ORF_1502	mannitol PTS, EIICB	1839	up
ORF_1503	transcription regulator	2076	up
ORF_1504	mannitol PTS, EIIA	450	up
ORF_1505	mannitol-1-phosphate 5-dehydrogenase	1158	up
ORF_1506	conserved hypothetical protein	552	up
ORF_1509	conserved hypothetical protein	324	up
ORF_1510	nucleoside-diphosphate kinase	465	up
ORF_1521	serine O-acetyltransferase	543	up
ORF_1522	cystathionine beta-lyase	1146	up
ORF_1523	cysteine synthase	912	up
ORF_1547	cellobiose PTS, EIIC	1326	up
ORF_1554	transcription regulator (putative)	573	up
ORF_1555	transport protein	3954	up
ORF_1575	ribosomal protein S15	270	up
ORF_1579	conserved hypothetical protein	915	up
ORF_1581	trigger factor	1323	up
ORF_1587	glutamine ABC superfamily ATP binding cassette transporter, substrate binding and permease protein	1476	up
ORF_1588	glutamine ABC transporter, ATP-binding protein	741	up
ORF_1600	fructose PTS, EIIABC	1968	up
ORF_1601	1-phosphofructokinase	918	up
ORF_1612	integral membrane protein	1212	up
ORF_1613	conserved hypothetical protein	348	up
ORF_1616	prophage Lp2 protein 2, integrase	1164	up
ORF_1617	transposase	186	up
ORF_1621	conserved hypothetical protein	618	up
ORF_1633	malate transport protein (putative)	927	up
ORF_1637	conserved hypothetical protein	843	up
ORF_1639	lipoprotein precursor, peptide binding protein OppA-like protein	1662	up
ORF_1640	possible acetyltransferase	444	up
ORF_1641	phosphoglycerate dehydrogenase	1179	up
ORF_1642	phosphoserine aminotransferase	1074	up
ORF_1645	conserved hypothetical protein	222	up
ORF_1646	conserved hypothetical protein	351	up
ORF_1647	adherence protein	366	up
ORF_1682	aspartate kinase	1353	up
ORF_1683	glutamine ABC transporter, substrate binding protein	840	up
ORF_1684	glutamine ABC transporter, ATP-binding protein	642	up
ORF_1685	glutamine ABC transporter, permease protein	642	up
ORF_1693	valyl-tRNA synthetase	2670	up
ORF_1698	hypothetical protein	132	up
ORF_1701	30S ribosomal protein S4	609	up
ORF_1705	ArsR family transcription regulator	279	up
ORF_1718	amino acid ABC transporter, permease protein	693	up
ORF_1719	amino acid ABC transporter, ATP-binding protein	1032	up
ORF_1748	branched-chain amino acid aminotransferase	1029	up
ORF_1757	prophage Lp1 protein 58, lysin	1167	up
ORF_1795	immunity repressor protein (phage-related protein)	321	up
ORF_1796	conserved hypothetical protein	423	up
ORF_1797	prophage Lp1 protein 2	720	up
ORF_1803	ImpB/MucB/SamB family protein	1317	up
ORF_1804	conserved hypothetical protein	321	up
ORF_1822	conserved hypothetical protein	234	up
ORF_1826	pyruvate oxidase	1812	up
ORF_1844	N-acetylglucosamine and glucose PTS, EIICBA	1908	up
ORF_1845	mannose-6-phosphate isomerase	1332	up
ORF_1849	mannose-6-phosphate isomerase	1344	up
ORF_1850	hypothetical protein	123	up
ORF_1851	6-phospho-beta-glucosidase	1458	up
ORF_1852	phosphoenolpyruvate-dependent sugar phosphotransferase system EIIC, putative cellobiose specific	1293	up
ORF_1865	alpha-1,2-mannosidase (putative)	2148	up
ORF_1887	putative ribose uptake protein rbsU	885	up
ORF_1888	D-ribose pyranase	396	up
ORF_1889	ribokinase	921	up
ORF_1892	xylose isomerase	1350	up
ORF_1894	alpha-glucosidase, family 31 of glycosyl hydrolase	2289	up
ORF_1895	RecName: Full=Putative xylose-proton symporter; AltName: Full=Xylose transporter >gi|3688059|gb|AAC62250.1| isoprimeverose cation-symporter XylP	1440	up
ORF_1898	regulator of phenolic acid metabolism PadR	546	up
ORF_1899	p-coumaric acid decarboxylase	537	up
ORF_1900	2-oxo-hept-3-ene-1,7-dioate hydratase; 2-oxo-hept-4-ene-1,7-dioate hydratase	801	up
ORF_1936	prophage Lp1 protein 66, lipoprotein precursor	669	up
ORF_1937	prophage Lp1 protein 65	978	up
ORF_1938	ribosomal protein L7/L12	369	up
ORF_1939	ribosomal protein L10	504	up
ORF_1940	50S ribosomal protein L1	690	up
ORF_1941	50S ribosomal protein L11	426	up
ORF_1962	malate transport protein	963	up
ORF_1977	bacteriocin activator	156	up
ORF_2001	cold shock protein CspP	201	up
ORF_2009	RNA methyltransferase	1374	up
ORF_2033	amino acid transport protein	1428	up
ORF_2034	malate transport protein	972	up
ORF_2035	malate dehydrogenase	1644	up
ORF_2039	fumarate reductase subunit A	1389	up
ORF_2040	fumarate hydratase	1383	up
ORF_2051	manganese ABC transporter, substrate binding protein	942	up
ORF_2052	manganese ABC superfamily ATP binding cassette transporter, permease protein	876	up
ORF_2053	manganese ABC transporter, ATP-binding protein	738	up
ORF_2054	triphosphoribosyl-dephospho-CoA synthase	843	up
ORF_2067	30S ribosomal protein S9	393	up
ORF_2068	50S ribosomal protein L13	444	up
ORF_2074	conserved hypothetical protein	114	up
ORF_2079	trans-hexaprenyltranstransferase, component II	993	up
ORF_2080	ribosomal protein L17	384	up
ORF_2081	DNA-directed RNA polymerase subunit alpha	945	up
ORF_2082	30S ribosomal protein S11	390	up
ORF_2083	30S ribosomal protein S13	366	up
ORF_2084	translation initiation factor IF-1	219	up
ORF_2085	adenylate kinase	660	up
ORF_2086	preprotein translocase subunit SecY	1134	up
ORF_2087	ribosomal protein L15	432	up
ORF_2088	50S ribosomal protein L30	183	up
ORF_2089	30S ribosomal protein S5	501	up
ORF_2090	ribosomal protein L18	357	up
ORF_2091	50S ribosomal protein L6	537	up
ORF_2092	30S ribosomal protein S8	396	up
ORF_2093	50S ribosomal protein L5	543	up
ORF_2094	ribosomal protein L24	312	up
ORF_2095	ribosomal protein L14	369	up
ORF_2096	30S ribosomal protein S17	270	up
ORF_2097	50S ribosomal protein L29	195	up
ORF_2098	50S ribosomal protein L16	435	up
ORF_2099	30S ribosomal protein S3	654	up
ORF_2100	50S ribosomal protein L22	348	up
ORF_2101	30S ribosomal protein S19	276	up
ORF_2102	50S ribosomal protein L2	840	up
ORF_2103	50S ribosomal protein L23	294	up
ORF_2104	50S ribosomal protein L4	624	up
ORF_2105	50S ribosomal protein L3	630	up
ORF_2106	30S ribosomal protein S10	309	up
ORF_2107	elongation factor G	2097	up
ORF_2108	30S ribosomal protein S7	471	up
ORF_2109	30S ribosomal protein S12	414	up
ORF_2110	type 4 prepilin-like proteins leader peptide processing enzyme (putative)	408	up
ORF_2111	DNA-directed RNA polymerase subunit beta'	3654	up
ORF_2112	DNA-directed RNA polymerase subunit beta	3606	up
ORF_2117	seryl-tRNA synthetase	1278	up
ORF_2127	phosphatase (putative)	663	up
ORF_2131	cold shock protein CspC	201	up
ORF_2135	multidrug transport protein	1479	up
ORF_2136	conserved hypothetical protein	723	up
ORF_2138	lipoprotein precursor	1143	up
ORF_2139	conserved hypothetical protein	504	up
ORF_2141	lysin	1302	up
ORF_2142	conserved hypothetical protein	666	up
ORF_2159	conserved hypothetical protein	639	up
ORF_2161	proline-specific peptidase	906	up
ORF_2167	bifunctional ornithine acetyltransferase/N-acetylglutamate synthase protein	1209	up
ORF_2168	N-acetyl-gamma-glutamyl-phosphate reductase	1026	up
ORF_2169	carbamoyl phosphate synthase small subunit	1068	up
ORF_2170	carbamoyl-phosphate synthase, large subunit	3063	up
ORF_2173	NMT1/THI5 like protein	1053	up
ORF_2187	histidinol-phosphate transaminase	1071	up
ORF_2188	phosphoribosyl-ATP pyrophosphatase	321	up
ORF_2190	imidazole glycerol phosphate synthase, cyclase subunit	759	up
ORF_2191	phosphoribosylformimino-5-aminoimidazole carboxamideribotide isomerase	720	up
ORF_2192	imidazole glycerol phosphate synthase subunit HisH	627	up
ORF_2193	imidazoleglycerol-phosphate dehydratase	585	up
ORF_2194	histidinol dehydrogenase	1287	up
ORF_2195	ATP phosphoribosyltransferase	657	up
ORF_2196	histidine--tRNA ligase (putative)	1152	up
ORF_2197	histidinol-phosphatase	819	up
ORF_2199	MIT family Mg2+ and Co2+ transporter	909	up
ORF_2200	conserved hypothetical protein	348	up
ORF_2222	transcription regulator	864	up
ORF_2227	conserved hypothetical protein	129	up
ORF_2233	conserved hypothetical protein	282	up
ORF_2234	alpha/beta hydrolase	924	up
ORF_2240	pyruvate oxidase	1758	up
ORF_2243	cystathionine gamma-synthase	1122	up
ORF_2246	conserved hypothetical protein	507	up
ORF_2260	phosphoketolase	2367	up
ORF_2261	acetylesterase	849	up
ORF_2268	conserved hypothetical protein	363	up
ORF_2272	conserved hypothetical protein	486	up
ORF_2287	acetyltransferase (putative)	525	up
ORF_2299	purine transport regulator	1590	up
ORF_2307	glycosyltransferase (putative)	1329	up
ORF_2320	NADPH-dependent FMN reductase domain protein	1296	up
ORF_2342	neopullulanase	1725	up
ORF_2345	pentapeptide repeats containing protein	636	up
ORF_2357	ABC transporter, ATP-binding protein	744	up
ORF_2367	HAD superfamily hydrolase	834	up
ORF_2368	2-dehydropantoate 2-reductase	1020	up
ORF_2390	conserved hypothetical protein	1137	up
ORF_2398	serine transporter	1281	up
ORF_2399	serine--tRNA ligase	1272	up
ORF_2401	CTP synthetase	1614	up
ORF_2407	cof family protein	810	up
ORF_2418	zinc/iron ABC transporter, permease protein	804	up
ORF_2419	zinc/iron ABC transporter, ATP-binding protein	699	up
ORF_2427	drug resistance transporter	1185	up
ORF_2428	methionine--tRNA ligase	2052	up
ORF_2444	conserved hypothetical protein	423	up
ORF_2445	conserved hypothetical protein	189	up
ORF_2446	cellobiose PTS, EIIC	1362	up
ORF_2447	transcription regulator	711	up
ORF_2448	tryptophanyl-tRNA synthetase II	1017	up
ORF_2449	carbon-nitrogen family hydrolase	777	up
ORF_2477	transport protein	1155	up
ORF_2478	galactoside O-acetyltransferase	618	up
ORF_2516	NrdI family protein	438	up
ORF_2517	ribonucleoside-diphosphate reductase	2169	up
ORF_2518	ribonucleoside-diphosphate reductase beta subunit	927	up
ORF_2519	ribonucleoside-diphosphate reductase beta subunit	951	up
ORF_2526	malate dehydrogenase (putative)	1089	up
ORF_2549	serine/threonine protein kinase	1065	up
ORF_2551	extracellular protein	555	up
ORF_2556	transport protein	723	up
ORF_2557	integral membrane protein	351	up
ORF_2564	peptidyl-prolyl cis-trans isomerase	930	up
ORF_2566	integral membrane protein	726	up
ORF_2567	translation-associated GTPase	1101	up
ORF_2568	conserved hypothetical protein	192	up
ORF_2569	chromosome partitioning protein, DNA-binding protein	891	up
ORF_2570	chromosome partitioning protein, membrane-associated ATPase	768	up
ORF_2571	chromosome partitioning protein, DNA-binding protein	852	up
ORF_2572	16S rRNA methyltransferase GidB	735	up
ORF_2573	nucleoside transport protein	1284	up
ORF_2581	amino acid ABC transporter, substrate binding protein	816	up
ORF_2583	transcription regulator (putative)	318	up
ORF_2584	integral membrane protein (putative)	639	up
ORF_2585	conserved hypothetical protein	936	up
ORF_2593	conserved hypothetical protein	444	up
ORF_2616	effector of murein hydrolase (putative)	420	up
ORF_2617	effector of murein hydrolase (putative)	729	up
ORF_2639	conserved hypothetical protein	123	up
ORF_2640	conserved hypothetical protein	1119	up
ORF_2643	hemolysin III	639	up
ORF_2658	ABC superfamily ATP binding cassette transporter, binding protein	981	up
ORF_2664	4'-phosphopantetheinyl transferase, CesP	717	up
ORF_2669	levA protein	435	up
ORF_2670	transcriptional activator	2529	up
ORF_2688	30S ribosomal protein S2	804	up
ORF_2689	elongation factor Ts	879	up
ORF_2705	transport protein	1455	up
ORF_2706	chorismate synthase	1170	up
ORF_2707	conserved hypothetical protein	528	up
ORF_2708	3-phosphoshikimate 1-carboxyvinyltransferase	1299	up
ORF_2709	prephenate dehydrogenase	1098	up
ORF_2710	shikimate kinase	522	up
ORF_2720	D-alanine--D-alanyl carrier protein ligase	1527	up
ORF_2721	D-alanyl transfer protein DltB	1215	up
ORF_2722	D-alanine--poly(phosphoribitol) ligase subunit 2	237	up
ORF_2723	D-alanyl transfer protein DltD	1278	up
ORF_2736	histidyl-tRNA synthetase	1281	up
ORF_2737	aspartyl-tRNA synthetase	1797	up
ORF_2738	protein-methionine-S-oxide reductase	531	up
ORF_2744	30S ribosomal protein S21	189	up
ORF_2745	conserved hypothetical protein	444	up
ORF_2751	glycyl-tRNA synthetase subunit alpha	900	up
ORF_2752	glycine-tRNA ligase, beta chain	2085	up
ORF_2764	acetyltransferase (putative)	468	up
ORF_2800	ABC transporter, ATP-binding protein	942	up
ORF_2810	pyruvate kinase	1761	up
ORF_2824	GTP-binding protein EngA	1311	up
ORF_2825	DNA-binding protein II	276	up
ORF_2845	transcription regulator	930	up
ORF_2852	tRNA:M(5)U-54 methyltransferase	1326	up
ORF_2864	conserved hypothetical protein	201	up
ORF_2871	protease synthase and sporulation negative regulatory protein pai 1	528	up
ORF_2872	ribitolphosphotransferase	1896	up
ORF_2873	ribitolphosphotransferase	1107	up
ORF_2917	conserved hypothetical protein	141	up
ORF_2918	ABC transporter, ATP-binding protein	678	up
ORF_2919	transport protein	753	up
ORF_2920	microcin immunity protein	969	up
ORF_2921	lysin	1344	up
ORF_2922	GNAT family acetyltransferase	489	up
ORF_2923	MccC family protein	1080	up
ORF_2929	methylase (putative)	342	up
ORF_2938	amino acid ABC transporter, substrate binding protein	858	up
ORF_2939	amino acid ABC transporter, permease protein	672	up
ORF_2940	amino acid ABC transporter, ATP-binding protein	1068	up
ORF_2946	mevalonate kinase	939	up
ORF_2947	diphosphomevalonate decarboxylase	978	up
ORF_2949	isopentenyl pyrophosphate isomerase	1047	up
ORF_2950	aldose 1-epimerase	1014	up
ORF_2951	maltose phosphorylase	2247	up
ORF_2952	sugar transport protein (putative)	1347	up
ORF_2957	amino acid transport protein	1500	up
ORF_2958	4-aminobutyrate aminotransferase	1350	up
ORF_2963	conserved hypothetical protein	117	up
ORF_2964	diaminopimelate decarboxylase	1326	up
ORF_2965	4-oxalocrotonate tautomerase	195	up
ORF_2987	transport protein	1704	up
ORF_2991	transcription regulator	888	up
ORF_2992	integral membrane protein	726	up
ORF_2993	phosphopantetheinyltransferase	552	up
ORF_2994	enoyl-(acyl carrier protein) reductase	759	up
ORF_2995	acetyl-CoA carboxylase, carboxyl transferase subunit alpha	771	up
ORF_2996	acetyl-CoA carboxylase, carboxyl transferase subunit beta	843	up
ORF_2997	acetyl-CoA carboxylase, biotin carboxylase subunit	1389	up
ORF_2998	(3R)-hydroxymyristoyl-(acyl carrier protein) dehydratase	414	up
ORF_2999	acetyl-CoA carboxylase, biotin carboxyl carrier protein	462	up
ORF_3000	3-oxoacyl-(acyl-carrier protein) synthase II	1233	up
ORF_3001	3-oxoacyl-	723	up
ORF_3002	(acyl-carrier protein) S-malonyltransferase	933	up
ORF_3003	acyl carrier protein	249	up
ORF_3004	3-oxoacyl-(acyl carrier protein) synthase III	987	up
ORF_3005	(3R)-hydroxymyristoyl-[acyl carrier protein] dehydratase	444	up
ORF_3021	anthranilate synthase, component I	1437	up
ORF_3022	conserved hypothetical protein	150	up
ORF_3029	50S ribosomal protein L19	357	up
ORF_3032	conserved hypothetical protein	258	up
ORF_3033	30S ribosomal protein S16	273	up
ORF_3044	ribosomal protein L28	186	up
ORF_3045	conserved hypothetical protein	156	up
ORF_3046	conserved hypothetical protein	660	up
ORF_3047	ribulose-phosphate 3-epimerase	654	up
ORF_3048	translation factor, GTPase (putative)	897	up
ORF_3057	conserved hypothetical protein	336	up
ORF_3073	50S ribosomal protein L27	279	up
ORF_3074	ribosomal protein (putative)	336	up
ORF_3075	ribosomal protein L21	309	up
ORF_3077	conserved hypothetical protein	156	up
ORF_3090	conserved hypothetical protein	621	up
ORF_3097	conserved hypothetical protein	303	up
ORF_3098	conserved hypothetical protein	456	up
ORF_3099	integral membrane protein	723	up
ORF_3113	prenyltransferase	969	up
ORF_3120	muramidase (putative)	2583	up
ORF_3123	glycerol uptake facilitator protein	753	up
ORF_3124	thioredoxin	321	up
ORF_3125	conserved hypothetical protein	270	up
ORF_3132	transposase IS66	282	up
ORF_0001	transporter, major facilitator family protein	1392	down
ORF_0002	conserved hypothetical protein	273	down
ORF_0003	conserved hypothetical protein	231	down
ORF_0004	prophage Lp3 protein 24	207	down
ORF_0006	conserved hypothetical protein	816	down
ORF_0010	cell surface protein precursor	2355	down
ORF_0011	transcription regulator	441	down
ORF_0012	polysaccharide biosynthesis protein	1422	down
ORF_0020	recombination regulator RecX	804	down
ORF_0024	conserved hypothetical protein	246	down
ORF_0051	ATP-dependent Clp protease ATP-binding subunit ClpC	2220	down
ORF_0061	sulfatase	2106	down
ORF_0062	hypothetical protein	123	down
ORF_0070	Protein of hypothetical function DUF1706	510	down
ORF_0072	permease	1836	down
ORF_0076	conserved hypothetical protein	126	down
ORF_0077	signal peptidase I	588	down
ORF_0078	extracellular protein	1539	down
ORF_0079	cell surface protein precursor	342	down
ORF_0080	cell surface protein precursor	1026	down
ORF_0081	extracellular protein	738	down
ORF_0089	chromosomal replication initiation protein DnaA	1368	down
ORF_0090	DNA-directed DNA polymerase III, beta chain	1140	down
ORF_0100	replicative DNA helicase DnaC	1425	down
ORF_0106	1,4-alpha-glucan branching enzyme	1905	down
ORF_0107	glucose-1-phosphate adenylyltransferase	1140	down
ORF_0108	glucose-1-phosphate adenylyltransferase, subunit	1173	down
ORF_0109	starch (glycogen) synthase	1440	down
ORF_0110	glycogen phosphorylase	2397	down
ORF_0111	alpha-amylase	1818	down
ORF_0112	HAD superfamily hydrolase	768	down
ORF_0113	beta-phosphoglucomutase	672	down
ORF_0118	response regulator	708	down
ORF_0119	histidine protein kinase; sensor protein	1875	down
ORF_0120	YycH-like protein	1326	down
ORF_0121	conserved hypothetical protein	855	down
ORF_0122	hydrolase	816	down
ORF_0123	serine protease HtrA	1263	down
ORF_0124	SPOUT methyltransferase superfamily protein	480	down
ORF_0136	short-chain dehydrogenase/oxidoreductase	861	down
ORF_0137	acetoacetate decarboxylase (putative)	846	down
ORF_0138	nitroreductase	654	down
ORF_0148	acyl carrier protein phosphodiesterase (putative)	648	down
ORF_0158	conserved hypothetical protein	156	down
ORF_0159	predicted protein	648	down
ORF_0163	conserved hypothetical protein	1194	down
ORF_0164	conserved hypothetical protein	1338	down
ORF_0165	conserved hypothetical protein	300	down
ORF_0167	conserved hypothetical protein	279	down
ORF_0168	extracellular protein	573	down
ORF_0169	extracellular protein	693	down
ORF_0170	cell surface protein precursor	1014	down
ORF_0171	extracellular protein	2151	down
ORF_0177	cell surface hydrolase, membrane-bound	915	down
ORF_0178	low temperature requirement C protein (putative)	501	down
ORF_0180	transcription regulator	420	down
ORF_0181	negative regulator of proteolysis	405	down
ORF_0183	conserved hypothetical protein	324	down
ORF_0184	A/G-specific adenine glycosylase (putative)	1101	down
ORF_0185	conserved hypothetical protein	366	down
ORF_0186	conserved hypothetical protein	507	down
ORF_0187	small heat shock protein	444	down
ORF_0188	conserved hypothetical protein	339	down
ORF_0189	conserved hypothetical protein	144	down
ORF_0190	oxidoreductase (putative)	639	down
ORF_0191	acetyltransferase	459	down
ORF_0193	integral membrane protein	699	down
ORF_0204	conserved hypothetical protein	387	down
ORF_0205	purine-cytosine transport protein	1374	down
ORF_0209	exopolysaccharide biosynthesis protein	771	down
ORF_0210	integral membrane protein	507	down
ORF_0212	ABC transporter, ATP-binding protein	1983	down
ORF_0215	co-chaperonin GroES	285	down
ORF_0216	chaperonin GroEL	1626	down
ORF_0218	undecaprenyl-phosphate N-acetyl-glucosaminyl transferase	1098	down
ORF_0219	conserved hypothetical protein	129	down
ORF_0224	conserved hypothetical protein	447	down
ORF_0225	transcription accessory protein	2172	down
ORF_0236	conserved hypothetical protein	843	down
ORF_0237	conserved hypothetical protein	336	down
ORF_0238	conserved hypothetical protein	318	down
ORF_0241	putative frv operon regulatory protein	1113	down
ORF_0250	acetylesterase	792	down
ORF_0251	integral membrane protein (putative)	372	down
ORF_0254	conserved hypothetical protein	852	down
ORF_0255	short-chain dehydrogenase/oxidoreductase	840	down
ORF_0256	shikimate 5-dehydrogenase	885	down
ORF_0257	shikimate 5-dehydrogenase	885	down
ORF_0264	FMN-binding protein	369	down
ORF_0280	alpha-L-rhamnosidase (putative)	1578	down
ORF_0281	sugar transport protein	1281	down
ORF_0282	RhaB1	1953	down
ORF_0289	ferrichrome ABC transporter, substrate binding lipo protein	930	down
ORF_0295	short-chain dehydrogenase/oxidoreductase	747	down
ORF_0296	conserved hypothetical protein	456	down
ORF_0299	cell surface protein precursor	6099	down
ORF_0300	cell surface protein precursor	1062	down
ORF_0301	extracellular protein	546	down
ORF_0304	transcription regulator	663	down
ORF_0305	GTP-binding protein LepA	1788	down
ORF_0312	GY family cell surface protein	3570	down
ORF_0313	stress induced DNA binding protein	468	down
ORF_0314	conserved hypothetical protein	219	down
ORF_0320	transketolase	1992	down
ORF_0321	PTS family ascorbate porter, IIC component	1377	down
ORF_0327	HxlR family transcriptional regulator	261	down
ORF_0330	conserved hypothetical protein	261	down
ORF_0383	integral membrane protein	564	down
ORF_0384	transcriptional regulator	315	down
ORF_0385	integral membrane protein	681	down
ORF_0386	conserved hypothetical protein	273	down
ORF_0389	transcription regulator	672	down
ORF_0390	conserved hypothetical protein	123	down
ORF_0392	extracellular zinc metalloproteinase (putative)	801	down
ORF_0393	conserved hypothetical protein	219	down
ORF_0400	extracellular protein	783	down
ORF_0401	cell surface protein precursor	1044	down
ORF_0402	cell surface protein precursor (putative)	378	down
ORF_0403	extracellular protein	1509	down
ORF_0404	ABC superfamily ATP binding cassette transporter	966	down
ORF_0405	ABC transporter, permease protein	1002	down
ORF_0407	N-acetylglucosamine PTS, EIICBA	1983	down
ORF_0412	transcription regulator (putative)	303	down
ORF_0413	transcription regulator	624	down
ORF_0414	metal-dependent hydrolase	924	down
ORF_0418	conserved hypothetical protein	1410	down
ORF_0420	esterase (putative)	741	down
ORF_0421	conserved hypothetical protein	258	down
ORF_0422	hydrolase	150	down
ORF_0425	3-octaprenyl-4-hydroxybenzoate carboxy-lyase	1473	down
ORF_0428	melibiose operon regulatory protein	162	down
ORF_0429	cell surface protein precursor	1260	down
ORF_0430	conserved hypothetical protein	195	down
ORF_0431	transcription regulator	1005	down
ORF_0439	PTS, EIIA	534	down
ORF_0440	conserved hypothetical protein	243	down
ORF_0443	lipase/esterase (putative)	831	down
ORF_0449	integral membrane protein	1926	down
ORF_0450	HAD superfamily hydrolase	795	down
ORF_0454	acetyltransferase (putative)	528	down
ORF_0464	oxidoreductase	1029	down
ORF_0465	conserved hypothetical protein	867	down
ORF_0466	possible cystathionine beta-lyase	1191	down
ORF_0467	conserved hypothetical protein	594	down
ORF_0472	conserved hypothetical protein	444	down
ORF_0473	conserved hypothetical protein	222	down
ORF_0474	short chain dehydrogenase	852	down
ORF_0475	alcohol dehydrogenase	1041	down
ORF_0476	oxidoreductase (putative)	597	down
ORF_0477	transcription regulator	879	down
ORF_0478	conserved hypothetical protein	372	down
ORF_0482	GNAT family acetyltransferase	498	down
ORF_0485	signal peptidase I	618	down
ORF_0486	galactoside O-acetyltransferase	621	down
ORF_0487	DNA-(apurinic or apyrimidinic site) lyase	651	down
ORF_0491	succinyl-diaminopimelate desuccinylase	1263	down
ORF_0492	transcription regulator	435	down
ORF_0493	conserved hypothetical protein	399	down
ORF_0494	carboxymuconolactone decarboxylase	321	down
ORF_0495	short-chain dehydrogenase/oxidoreductase	744	down
ORF_0503	asparagine synthase (glutamine-hydrolysing)	1902	down
ORF_0506	transcription regulator (putative)	363	down
ORF_0508	extracellular protein (putative)	825	down
ORF_0509	cell surface protein	2790	down
ORF_0510	cell surface protein precursor	372	down
ORF_0511	extracellular protein	609	down
ORF_0512	cell surface protein precursor	1044	down
ORF_0515	oxidoreductase	969	down
ORF_0516	extracellular protein	705	down
ORF_0517	cell surface protein precursor	1065	down
ORF_0518	cell surface protein precursor	426	down
ORF_0519	extracellular protein	1395	down
ORF_0520	sensor histidine protein kinase	1329	down
ORF_0521	conserved hypothetical protein	255	down
ORF_0522	4-hydroxybenzoyl-CoA thioesterase domain protein	135	down
ORF_0524	cell surface protein precursor	4074	down
ORF_0531	amino acid transport protein	1485	down
ORF_0532	conserved hypothetical protein	822	down
ORF_0533	conserved hypothetical protein	426	down
ORF_0534	conserved hypothetical protein	138	down
ORF_0535	short chain dehydrogenase/reductase family oxidoreductase	891	down
ORF_0536	aminoacylase	1200	down
ORF_0537	extracellular zinc metalloproteinase	1128	down
ORF_0538	ABC transporter, ATP-binding and permease protein	1725	down
ORF_0539	ABC transporter, ATP-binding protein	1782	down
ORF_0540	ABC transporter, permease protein (putative)	1191	down
ORF_0541	oxidoreductase (putative)	657	down
ORF_0547	integral membrane protein	1407	down
ORF_0548	short-chain dehydrogenase/oxidoreductase	744	down
ORF_0549	conserved hypothetical protein	420	down
ORF_0550	transcription regulator	912	down
ORF_0558	integral membrane protein	594	down
ORF_0561	transcription regulator	444	down
ORF_0562	dehydrogenase	1059	down
ORF_0566	cellobiose PTS, EIIA	447	down
ORF_0567	conserved hypothetical protein	138	down
ORF_0569	conserved hypothetical protein	315	down
ORF_0571	integral membrane protein	363	down
ORF_0572	cell surface protein precursor (putative)	3225	down
ORF_0574	rep protein	954	down
ORF_0581	GPH family glycoside-pentoside-hexuronide:cation symporter	1401	down
ORF_0582	lipase/esterase	1017	down
ORF_0584	alpha-ribazole-5'-phosphate phosphatase	669	down
ORF_0585	possible histone acetyltransferase	570	down
ORF_0586	integral membrane protein	765	down
ORF_0587	integral membrane protein	1155	down
ORF_0588	conserved hypothetical protein	1002	down
ORF_0589	integral membrane protein	765	down
ORF_0590	transcription regulator	327	down
ORF_0591	pseudouridylate synthase	882	down
ORF_0592	ATP-dependent DNA helicase RecQ	1809	down
ORF_0602	fumarate reductase, flavoprotein subunit precursor	1866	down
ORF_0604	transcription regulator	291	down
ORF_0607	conserved hypothetical protein	123	down
ORF_0608	GY family cell surface protein	3783	down
ORF_0609	conserved hypothetical protein	531	down
ORF_0613	hypothetical protein	132	down
ORF_0614	conserved hypothetical protein	573	down
ORF_0615	conserved hypothetical protein	333	down
ORF_0617	fumarylacetoacetate hydrolase	801	down
ORF_0618	hypothetical protein	117	down
ORF_0619	alkaline shock protein	441	down
ORF_0620	alkaline shock protein	423	down
ORF_0621	conserved hypothetical protein	183	down
ORF_0622	conserved hypothetical protein	546	down
ORF_0623	integral membrane protein	255	down
ORF_0626	cell surface protein	2505	down
ORF_0627	MFS family major facilitator transporter	1110	down
ORF_0628	transcriptional regulator	345	down
ORF_0630	transcription regulator	369	down
ORF_0631	integral membrane protein	369	down
ORF_0632	hypothetical protein	117	down
ORF_0645	DNA helicase (putative)	2307	down
ORF_0646	DedA family protein	648	down
ORF_0647	7,8-dihydro-8-oxoguanine-triphosphatase (putative)	954	down
ORF_0648	Na(+)/H(+) antiporter	1857	down
ORF_0651	GroEL supressor protein SugE	315	down
ORF_0652	MutT/nudix family protein	438	down
ORF_0656	multidrug transporter	1155	down
ORF_0657	transcription regulator	453	down
ORF_0658	integral membrane protein	879	down
ORF_0671	conserved hypothetical protein	252	down
ORF_0674	phosphoglycolate phosphatase (putative)	627	down
ORF_0675	conserved hypothetical protein	819	down
ORF_0676	extracellular protein	510	down
ORF_0679	conserved hypothetical protein	150	down
ORF_0685	probable organic hydroperoxide resistance protein	405	down
ORF_0688	biotin--	1005	down
ORF_0690	putative pyruvate oxidase	1761	down
ORF_0693	transport protein	1308	down
ORF_0694	conserved hypothetical protein	162	down
ORF_0695	transcription regulator	486	down
ORF_0701	integral membrane protein	462	down
ORF_0703	negative regulator of proteolysis	423	down
ORF_0704	conserved hypothetical protein	783	down
ORF_0725	oxidoreductase	978	down
ORF_0726	hydroxyethylthiazole kinase	792	down
ORF_0727	phosphomethylpyrimidine kinase	825	down
ORF_0728	thiamine-phosphate diphosphorylase	654	down
ORF_0729	purine-cytosine transport protein	1200	down
ORF_0730	conserved hypothetical protein	741	down
ORF_0738	stress-responsive transcription regulator (putative)	195	down
ORF_0740	transcription regulator (putative)	474	down
ORF_0741	small heat shock protein	423	down
ORF_0742	integral membrane protein	171	down
ORF_0744	conserved hypothetical protein	444	down
ORF_0748	oxidoreductase	849	down
ORF_0749	oxidoreductase	873	down
ORF_0751	conserved hypothetical protein	1695	down
ORF_0752	extracellular protein	813	down
ORF_0764	short-chain dehydrogenase/oxidoreductase	795	down
ORF_0768	conserved hypothetical protein	1542	down
ORF_0787	integral membrane protein	273	down
ORF_0798	P-type cation-transporting ATPase	2613	down
ORF_0801	2,5-diketo-D-gluconate reductase	861	down
ORF_0806	RNase III regulator YmdB	519	down
ORF_0807	transcription regulator (putative)	573	down
ORF_0808	integral membrane protein (putative)	324	down
ORF_0809	extracellular protein	969	down
ORF_0810	extracellular protein	3408	down
ORF_0811	cell surface protein precursor	1035	down
ORF_0812	extracellular protein	810	down
ORF_0818	glutamate decarboxylase	1410	down
ORF_0820	conserved hypothetical protein	336	down
ORF_0822	conserved hypothetical protein	594	down
ORF_0823	conserved hypothetical protein	312	down
ORF_0838	DegV family protein	897	down
ORF_0840	PTS family N-acetylglucosamine porter, IIABC component	1989	down
ORF_0841	conserved hypothetical protein	342	down
ORF_0849	cell wall-associated hydrolase	894	down
ORF_0851	hypothetical protein	147	down
ORF_0854	transport protein	1188	down
ORF_0855	conserved hypothetical protein	318	down
ORF_0865	conserved hypothetical protein	192	down
ORF_0866	ABC transporter, ATP-binding and permease protein	399	down
ORF_0867	ABC transporter, ATP-binding and permease protein	1605	down
ORF_0868	poly(glycerol-phosphate) alpha-glucosyltransferase	1578	down
ORF_0869	ABC transporter, ATP-binding and permease protein	1764	down
ORF_0870	conserved hypothetical protein	132	down
ORF_0871	conserved hypothetical protein	144	down
ORF_0872	hypothetical protein	168	down
ORF_0873	conserved hypothetical protein	510	down
ORF_0874	mobilization protein	1086	down
ORF_0875	replication protein 141	711	down
ORF_0876	conserved hypothetical protein	447	down
ORF_0879	glutathione reductase	1332	down
ORF_0883	cell surface protein precursor	1713	down
ORF_0884	cell surface protein precursor	1674	down
ORF_0885	transposase	690	down
ORF_0891	HD domain protein	198	down
ORF_0892	S-adenosyl-L-homocysteine hydrolase, NAD binding domain protein	1155	down
ORF_0920	D-alanyl-D-alanine dipeptidase	558	down
ORF_0921	multidrug transport protein	1197	down
ORF_0928	integral membrane protein	537	down
ORF_0929	conserved hypothetical protein	885	down
ORF_0935	RNA polymerase factor sigma-54	1338	down
ORF_0947	cell surface protein	7947	down
ORF_0954	ATP/GTP hydrolase	462	down
ORF_0955	acetyltransferase (putative)	516	down
ORF_0956	DNA-directed DNA polymerase III epsilon subunit	537	down
ORF_0957	exodeoxyribonuclease III	798	down
ORF_0958	oxidoreductase (putative)	903	down
ORF_0962	integral membrane protein	666	down
ORF_0971	aldose 1-epimerase	1020	down
ORF_0972	conserved hypothetical protein	231	down
ORF_0973	conserved hypothetical protein	426	down
ORF_0974	nitro/flavin reductase	753	down
ORF_0977	conserved hypothetical protein	381	down
ORF_0978	RNA binding protein	402	down
ORF_0988	acetate kinase	1194	down
ORF_0989	adenine-specific methyltransferase	1095	down
ORF_0991	conserved hypothetical protein	489	down
ORF_0993	conserved hypothetical protein	471	down
ORF_0994	ComG operon protein 3 precursor	357	down
ORF_0995	ComG operon protein 2	969	down
ORF_0996	ComG operon protein 1	975	down
ORF_0997	ribokinase	921	down
ORF_0999	conserved hypothetical protein	321	down
ORF_1004	transcription regulator	462	down
ORF_1005	conserved hypothetical protein	513	down
ORF_1006	conserved hypothetical protein	417	down
ORF_1007	mechanosensitive transport protein	894	down
ORF_1008	amino acid amidohydrolase	1155	down
ORF_1009	2,3,4,5-tetrahydropyridine-2-carboxylate N-succinyltransferase	711	down
ORF_1010	conserved hypothetical protein	492	down
ORF_1011	phosphoesterase (putative)	519	down
ORF_1012	xanthosine triphosphate pyrophosphatase	609	down
ORF_1013	glutamate racemase	822	down
ORF_1017	conserved hypothetical protein	258	down
ORF_1018	conserved hypothetical protein	297	down
ORF_1019	Holliday junction resolvase-like protein	435	down
ORF_1020	conserved hypothetical protein	270	down
ORF_1035	ATP-dependent Clp protease, ATP-binding subunit ClpL	1626	down
ORF_1039	negative regulator of proteolysis	381	down
ORF_1040	catalase	1455	down
ORF_1042	conserved hypothetical protein	135	down
ORF_1045	oxidoreductase	1206	down
ORF_1047	N-acetylneuraminate lyase	879	down
ORF_1052	lipase/esterase (putative)	837	down
ORF_1053	lipase/esterase (putative)	837	down
ORF_1054	conserved hypothetical protein	408	down
ORF_1062	conserved hypothetical protein	399	down
ORF_1077	HAD superfamily hydrolase	819	down
ORF_1078	choloylglycine hydrolase	975	down
ORF_1082	maltose phosphorylase	2205	down
ORF_1091	glucose PTS, EIIA	483	down
ORF_1093	putative PTS transporter components IIBC	1458	down
ORF_1094	cystathionine beta-lyase	1164	down
ORF_1096	esterase (putative)	990	down
ORF_1102	conserved hypothetical protein	246	down
ORF_1104	conserved hypothetical protein	642	down
ORF_1105	ABC transporter, ATP-binding protein	423	down
ORF_1114	integral membrane protein	366	down
ORF_1116	GNAT family acetyltransferase	444	down
ORF_1117	transcription regulator	423	down
ORF_1118	NADH dehydrogenase	1203	down
ORF_1120	conserved hypothetical protein	411	down
ORF_1121	conserved hypothetical protein	429	down
ORF_1128	acetyltransferase (putative)	486	down
ORF_1129	acetyltransferase (putative)	528	down
ORF_1130	conserved hypothetical protein	186	down
ORF_1134	acetaldehyde dehydrogenase	1368	down
ORF_1140	dipeptidase	1413	down
ORF_1141	conserved hypothetical protein	246	down
ORF_1142	integral membrane protein	564	down
ORF_1143	biotin-(acetyl-CoA-carboxylase)ligase and biotin operon repressor	972	down
ORF_1144	conserved hypothetical protein	123	down
ORF_1145	penicillin-binding protein 2	1152	down
ORF_1146	conserved hypothetical protein	1167	down
ORF_1147	teichoic acid ABC transporter, permease protein	816	down
ORF_1148	teichoic acid ABC transporter, ATP-binding protein	1092	down
ORF_1149	integral membrane protein	273	down
ORF_1150	transcription regulator	543	down
ORF_1151	transport protein	1446	down
ORF_1155	extracellular zinc metalloproteinase	564	down
ORF_1157	cell division protein SufI	1506	down
ORF_1162	conserved hypothetical protein	456	down
ORF_1163	acetyl-CoA carboxylase, biotin carboxyl carrier protein	573	down
ORF_1165	short chain dehydrogenase/reductase family oxidoreductase	912	down
ORF_1166	transport protein	1188	down
ORF_1173	poly(glycerol-phosphate) alpha-glucosyltransferase	1509	down
ORF_1174	poly(glycerol-phosphate) alpha-glucosyltransferase	1545	down
ORF_1193	conserved hypothetical protein	501	down
ORF_1194	metallo-beta-lactamase	744	down
ORF_1199	conserved hypothetical protein	636	down
ORF_1211	conserved hypothetical protein	648	down
ORF_1216	integral membrane protein	369	down
ORF_1233	putative ABC transporter, integral membrane protein	867	down
ORF_1234	LytTr family transcriptional regulator	459	down
ORF_1235	conserved hypothetical protein	405	down
ORF_1236	hypothetical protein	114	down
ORF_1237	diaminopimelate epimerase	999	down
ORF_1238	NUDIX family hydrolase	555	down
ORF_1239	conserved hypothetical protein	252	down
ORF_1240	methylthioadenosine nucleosidase; S-adenosylhomocysteine nucleosidase	693	down
ORF_1241	cysteine desulfurase	1161	down
ORF_1242	conserved hypothetical protein	342	down
ORF_1248	extracellular protein	1449	down
ORF_1249	phosphoglycerate mutase	666	down
ORF_1250	conserved hypothetical protein	675	down
ORF_1251	exodeoxyribonuclease V alpha subunit	2550	down
ORF_1258	conserved hypothetical protein	507	down
ORF_1269	adenine phosphoribosyltransferase	543	down
ORF_1270	integral membrane protein	1074	down
ORF_1271	conserved hypothetical protein	522	down
ORF_1273	conserved hypothetical protein	837	down
ORF_1278	glycosyltransferase	1500	down
ORF_1282	hypothetical protein	114	down
ORF_1283	hypothetical protein	1287	down
ORF_1284	hypothetical protein	405	down
ORF_1285	conserved hypothetical protein	888	down
ORF_1286	conserved hypothetical protein	675	down
ORF_1287	poly(glycerol-phosphate) alpha-glucosyltransferase	1509	down
ORF_1288	poly(glycerol-phosphate) alpha-glucosyltransferase	1527	down
ORF_1289	conserved hypothetical protein	198	down
ORF_1290	methyltransferase (putative)	528	down
ORF_1296	dipeptidase PepV	1404	down
ORF_1297	possible universal stress protein	507	down
ORF_1301	sugar ABC transporter, substrate binding protein (putative)	1353	down
ORF_1304	large-conductance mechanosensitive channel	381	down
ORF_1310	conserved hypothetical protein	216	down
ORF_1311	protein-methionine-S-oxide reductase	804	down
ORF_1312	conserved hypothetical protein	117	down
ORF_1313	transcription regulator	393	down
ORF_1314	conserved hypothetical protein	642	down
ORF_1318	histidine protein kinase; sensor protein	1263	down
ORF_1319	response regulator	768	down
ORF_1321	integral membrane protein	372	down
ORF_1322	CAAX family protease	687	down
ORF_1324	conserved hypothetical protein	513	down
ORF_1325	conserved hypothetical protein	288	down
ORF_1326	excinuclease ABC, subunit A	2268	down
ORF_1334	conserved hypothetical protein	1638	down
ORF_1335	sulfate adenylyltransferase	1176	down
ORF_1336	adenylylsulfate kinase	624	down
ORF_1337	exopolyphosphatase-related protein (putative)	957	down
ORF_1338	hypothetical protein	120	down
ORF_1339	arylsulfate sulfotransferase	1740	down
ORF_1341	sodium/sulfate symport protein (putative)	1776	down
ORF_1342	cation efflux protein (putative)	1392	down
ORF_1346	conserved hypothetical protein	477	down
ORF_1347	hypothetical protein	114	down
ORF_1349	conserved hypothetical protein	657	down
ORF_1350	transcription regulator levR	2556	down
ORF_1351	conserved hypothetical protein	450	down
ORF_1353	beta-glucosides PTS, EIIB	300	down
ORF_1354	beta-glucosides PTS, EIIC	1356	down
ORF_1359	D-alanine--poly(phosphoribitol) ligase subunit 2	237	down
ORF_1369	conserved hypothetical protein	981	down
ORF_1370	conserved hypothetical protein	1170	down
ORF_1371	nisin resistance protein (putative)	870	down
ORF_1372	transcription regulator	948	down
ORF_1373	conserved hypothetical protein	162	down
ORF_1378	histidine protein kinase; sensor protein	1368	down
ORF_1379	response regulator	693	down
ORF_1383	DedA protein (DSG-1 protein)	636	down
ORF_1384	glycosyltransferase	996	down
ORF_1385	integral membrane protein	2037	down
ORF_1386	MutT/NudX family protein (putative)	414	down
ORF_1387	integral membrane protein	2550	down
ORF_1394	transcription regulator	642	down
ORF_1396	NADH peroxidase	1317	down
ORF_1397	extracellular protein	3279	down
ORF_1398	cell surface protein precursor	372	down
ORF_1399	cell surface protein precursor	1047	down
ORF_1400	extracellular protein	681	down
ORF_1401	extracellular protein	288	down
ORF_1408	conserved hypothetical protein	786	down
ORF_1409	tRNA (guanine-N(7)-)-methyltransferase	699	down
ORF_1411	tRNA-binding domain protein	642	down
ORF_1424	integral membrane protein	717	down
ORF_1438	transcription regulator (putative)	348	down
ORF_1439	aspartate racemase	747	down
ORF_1441	conserved hypothetical protein	483	down
ORF_1442	HAD superfamily hydrolase	531	down
ORF_1443	ribosome biogenesis GTPase YqeH	1137	down
ORF_1444	conserved hypothetical protein	315	down
ORF_1445	nicotinate-nucleotide adenylyltransferase	636	down
ORF_1446	conserved hypothetical protein	618	down
ORF_1447	conserved hypothetical protein	357	down
ORF_1448	methyltransferase (putative)	735	down
ORF_1449	conserved hypothetical protein	1152	down
ORF_1452	lipoprotein precursor	585	down
ORF_1453	cation transport protein	963	down
ORF_1455	replication-associated recombination protein A	1350	down
ORF_1467	conserved hypothetical protein	282	down
ORF_1468	conserved hypothetical protein	213	down
ORF_1469	nicking enzyme (TraA)-like	2064	down
ORF_1484	hypothetical protein	213	down
ORF_1485	conserved hypothetical protein	348	down
ORF_1486	conserved hypothetical protein	264	down
ORF_1495	glutathione peroxidase	486	down
ORF_1496	2,5-diketo-D-gluconate reductase	831	down
ORF_1498	integral membrane protein	414	down
ORF_1499	transcription regulator	204	down
ORF_1507	thioredoxin	333	down
ORF_1508	conserved hypothetical protein	555	down
ORF_1511	conserved hypothetical protein	1347	down
ORF_1514	cellobiose PTS, EIIC	1278	down
ORF_1516	conserved hypothetical protein	1095	down
ORF_1526	conserved hypothetical protein	279	down
ORF_1527	integral membrane protein	288	down
ORF_1528	transcription regulator	720	down
ORF_1529	alpha, alpha-phosphotrehalase	1644	down
ORF_1530	beta-glucosides PTS, EIIABC	1998	down
ORF_1531	beta-glucosides PTS, EIIABC	1968	down
ORF_1532	conserved hypothetical protein	783	down
ORF_1537	manganese transport protein	1395	down
ORF_1538	conserved hypothetical protein	648	down
ORF_1539	extracellular protein	306	down
ORF_1540	conserved hypothetical protein	252	down
ORF_1542	transcription regulator	393	down
ORF_1546	transcription regulator	732	down
ORF_1548	conserved hypothetical protein	312	down
ORF_1549	conserved hypothetical protein	255	down
ORF_1551	oxidoreductase	1395	down
ORF_1552	conserved hypothetical protein	288	down
ORF_1553	GTP pyrophosphokinase (putative)	693	down
ORF_1557	extracellular protein	2058	down
ORF_1558	ABC superfamily ATP binding cassette transporter, membrane protein	1479	down
ORF_1559	conserved hypothetical protein	366	down
ORF_1560	conserved hypothetical protein	213	down
ORF_1566	conserved hypothetical protein	303	down
ORF_1567	probable methyltransferase	564	down
ORF_1568	pantetheine-phosphate adenylyltransferase	492	down
ORF_1569	endopeptidase La (putative)	1047	down
ORF_1570	ComE operon protein 1	726	down
ORF_1582	ATP-dependent protease ATP-binding subunit	1266	down
ORF_1583	GTPase EngB	594	down
ORF_1584	conserved hypothetical protein	297	down
ORF_1586	conserved hypothetical protein	171	down
ORF_1589	excinuclease ABC subunit C	1752	down
ORF_1590	exopolysaccharide biosynthesis protein	759	down
ORF_1591	capsular exopolysaccharide family protein	681	down
ORF_1592	exopolysaccharide biosynthesis protein	795	down
ORF_1593	UDP-glucose 4-epimerase	939	down
ORF_1594	priming glycosyltransferase	672	down
ORF_1595	glycosyltransferase	717	down
ORF_1596	polysaccharide polymerase	1275	down
ORF_1597	glycosyltransferase	969	down
ORF_1615	conserved hypothetical protein	207	down
ORF_1623	transcription regulator of multidrug-efflux transporter	816	down
ORF_1625	integral membrane protein	504	down
ORF_1631	Na(+)/H(+) antiporter	1167	down
ORF_1634	aspartate ammonia-lyase	1401	down
ORF_1635	cell surface protein precursor	2379	down
ORF_1636	hypothetical protein	132	down
ORF_1644	Aryl-alcohol dehydrogenase family enzyme	993	down
ORF_1648	exopolysaccharide biosynthesis protein; chain length determinator Wzz	579	down
ORF_1649	exopolysaccharide biosynthesis protein	774	down
ORF_1650	UDP-glucose 4-epimerase	948	down
ORF_1651	priming glycosyltransferase	678	down
ORF_1652	glycosyl transferase group 2	765	down
ORF_1653	glycosyltransferase	1023	down
ORF_1654	conserved hypothetical protein	1206	down
ORF_1655	lipopolysaccharide 1,6-galactosyltransferase	1032	down
ORF_1656	capsular polysaccharide phosphotransferase	984	down
ORF_1660	glycosyltransferase	909	down
ORF_1661	glycosyltransferase	933	down
ORF_1662	UDP-galactopyranose mutase	1134	down
ORF_1663	polysaccharide biosynthesis protein	1134	down
ORF_1664	polysaccharide biosynthesis protein (putative)	624	down
ORF_1665	polysaccharide polymerase	1218	down
ORF_1666	polysaccharide biosynthesis protein (putative)	1110	down
ORF_1667	O-acetyltransferase	1080	down
ORF_1669	conserved hypothetical protein	747	down
ORF_1676	competence-damage protein	1263	down
ORF_1677	CDP-diacylglycerol--glycerol-3-phosphate 3-phosphatidyltransferase	585	down
ORF_1681	conserved hypothetical protein	126	down
ORF_1695	glutamate-cysteine ligase (putative)	1239	down
ORF_1703	conserved hypothetical protein	465	down
ORF_1706	bifunctional glutamate--cysteine ligase/glutathione synthetase	2256	down
ORF_1708	integral membrane protein	285	down
ORF_1714	oxidoreductase	1029	down
ORF_1715	conserved hypothetical protein	975	down
ORF_1716	L-2-hydroxyisocaproate dehydrogenase	918	down
ORF_1725	ribosomal protein acetylating enzyme	555	down
ORF_1735	uracil transport protein	1281	down
ORF_1738	glycine hydroxymethyltransferase	1239	down
ORF_1739	SUA5 family translation factor	1020	down
ORF_1740	protoporphyrinogen oxidase (putative)	867	down
ORF_1741	peptide chain release factor 1	1083	down
ORF_1742	thymidine kinase	588	down
ORF_1743	UDP-N-acetylmuramyl tripeptide synthase (putative)	1347	down
ORF_1744	cobyric acid synthase (putative)	723	down
ORF_1746	beta-lactamase	1032	down
ORF_1747	conserved hypothetical protein	186	down
ORF_1758	conserved hypothetical protein	123	down
ORF_1759	conserved hypothetical protein	450	down
ORF_1762	probable minor tail protein	5832	down
ORF_1763	prophage protein	204	down
ORF_1764	prophage protein	399	down
ORF_1765	prophage major tail protein	471	down
ORF_1770	conjugal transfer protein	177	down
ORF_1771	prophage major head protein	1023	down
ORF_1772	prophage protein	348	down
ORF_1773	possible scaffold protein	678	down
ORF_1775	conserved hypothetical protein	201	down
ORF_1776	prophage minor head protein	1686	down
ORF_1778	SPP1 family phage portal protein	1509	down
ORF_1779	PBSX family phage terminase	1239	down
ORF_1783	prophage Lp1 protein 33	462	down
ORF_1784	prophage Lp2 protein 23	519	down
ORF_1786	DnaD domain protein	933	down
ORF_1787	conserved hypothetical protein	966	down
ORF_1790	prophage Lp2 protein 13	258	down
ORF_1806	Lactate dehydrogenase-like 2-hydroxyacid dehydrogenase	960	down
ORF_1807	putative LtrC	1125	down
ORF_1808	putative uncharacterized protein	216	down
ORF_1809	DNA topoisomerase	372	down
ORF_1810	DNA integration/recombination/inversion protein	633	down
ORF_1811	YitT family protein	903	down
ORF_1815	Replication initiator protein	138	down
ORF_1816	DNA-damage-inducible protein	282	down
ORF_1817	conserved hypothetical protein	507	down
ORF_1821	ATP-dependent Clp protease, ATP-binding subunit ClpL	258	down
ORF_1823	lactate oxidase	1101	down
ORF_1824	pyruvate oxidase	1749	down
ORF_1825	transcription regulator (putative)	426	down
ORF_1827	conserved hypothetical protein	411	down
ORF_1828	sugar specific permease (putative)	690	down
ORF_1829	Rhamnulose-1-phosphate aldolase	852	down
ORF_1830	L-rhamnose isomerase	1284	down
ORF_1831	conserved hypothetical protein	315	down
ORF_1840	Phosphotransferase system IIA component	489	down
ORF_1846	beta-phosphoglucomutase	681	down
ORF_1853	xylose repressor	1164	down
ORF_1854	xylose repressor	1167	down
ORF_1860	beta-glucosidase	1386	down
ORF_1861	ROK family protein	879	down
ORF_1867	fructokinase	864	down
ORF_1868	response regulator	1473	down
ORF_1869	histidine protein kinase; sensor protein	1713	down
ORF_1870	integral membrane protein	612	down
ORF_1871	glucan 1,6-alpha-glucosidase	1626	down
ORF_1880	transcription regulator	1050	down
ORF_1881	regulator	846	down
ORF_1882	PTS family lactose-N,N-diacetylchitobiose-beta-glucoside (lac) porter component IIA	348	down
ORF_1883	PTS system, IIC component	1239	down
ORF_1884	cellobiose-specific PTS system IIB component	312	down
ORF_1885	membrane-associated phospholipid phosphatase	948	down
ORF_1893	RecName: Full=Xylose repressor >gi|149605|gb|AAA25257.1| repressor protein	1167	down
ORF_1901	acetyltransferase (putative)	483	down
ORF_1902	transposase	309	down
ORF_1903	transposase	465	down
ORF_1908	O-sialoglycoprotein endopeptidase	1038	down
ORF_1909	ribosomal-protein-alanine N-acetyltransferase	456	down
ORF_1910	ribosomal-protein-alanine N-acetyltransferase	546	down
ORF_1911	glycoprotein endopeptidase	726	down
ORF_1913	phosphonates ABC transporter, ATP-binding protein	771	down
ORF_1921	conserved hypothetical protein	348	down
ORF_1924	thymidylate kinase	666	down
ORF_1925	conserved hypothetical protein	252	down
ORF_1926	recombination protein RecR	600	down
ORF_1927	conserved hypothetical protein	297	down
ORF_1928	DNA-directed DNA polymerase III, gamma/tau subunit	1698	down
ORF_1946	DNA-directed RNA polymerase, sigma factor 30	564	down
ORF_1947	conserved hypothetical protein	546	down
ORF_1948	tRNA/rRNA methyltransferase	768	down
ORF_1949	conserved hypothetical protein	411	down
ORF_1950	cysteine-tRNA ligase	1413	down
ORF_1964	acetyl-CoA carboxylase, carboxyl transferase subunit alpha	774	down
ORF_1965	acetyl-CoA carboxylase, carboxyl transferase subunit beta	804	down
ORF_1966	acetyl-CoA carboxylase, biotin carboxylase subunit	1323	down
ORF_1967	acetyl-CoA carboxylase, biotin carboxyl carrier protein	402	down
ORF_1968	3-oxoacyl-(acyl carrier protein) synthase III	972	down
ORF_1969	mannose PTS, EIIB	519	down
ORF_1970	mannose PTS, EIIA	420	down
ORF_1971	transcription regulator	2850	down
ORF_1976	conserved hypothetical protein	819	down
ORF_1980	dTDP-glucose 4,6-dehydratase	1029	down
ORF_1981	dTDP-4-dehydrorhamnose 3,5-epimerase	582	down
ORF_1982	glucose-1-phosphate thymidylyltransferase	870	down
ORF_1986	ribonuclease BN	930	down
ORF_1988	serine-type D-Ala-D-Ala carboxypeptidase	1176	down
ORF_1989	conserved hypothetical protein	129	down
ORF_1991	conserved hypothetical protein	564	down
ORF_1992	phosphoribosyl-ATP pyrophosphatase	132	down
ORF_1994	conserved hypothetical protein	201	down
ORF_1997	universal stress protein UspA family nucleotide-binding protein	441	down
ORF_1998	ATP-dependent RNA helicase	1335	down
ORF_1999	oxidoreductase (putative)	1008	down
ORF_2002	conserved hypothetical protein	366	down
ORF_2005	cell surface hydrolase (putative)	885	down
ORF_2006	cellobiose PTS, EIIC	1317	down
ORF_2007	E1-E2 family cation-transporting ATPase	2340	down
ORF_2008	transcription regulator (putative)	576	down
ORF_2011	aspartyl/glutamyl-tRNA amidotransferase subunit B	1425	down
ORF_2012	glutamyl-tRNA amidotransferase, subunit A	1464	down
ORF_2013	aspartyl/glutamyl-tRNA amidotransferase subunit C	321	down
ORF_2014	lipoprotein precursor	1176	down
ORF_2016	ATP-dependent DNA helicase PcrA	2268	down
ORF_2020	mannosyl-glycoprotein endo-beta-N-acetylglucosamidase	642	down
ORF_2023	trans-hexaprenyltranstransferase, component II	978	down
ORF_2028	cytochrome D ubiquinol oxidase, subunit II	996	down
ORF_2029	cytochrome D ubiquinol oxidase, subunit I	1440	down
ORF_2030	cell surface hydrolase	2706	down
ORF_2031	conserved hypothetical protein	177	down
ORF_2041	conserved hypothetical protein	123	down
ORF_2056	tartrate dehydratase subunit alpha	933	down
ORF_2057	L(+)-tartrate dehydratase subunit beta	612	down
ORF_2065	conserved hypothetical protein	1089	down
ORF_2066	DegV family protein	870	down
ORF_2113	transcription regulator (putative)	603	down
ORF_2118	deoxyguanosine kinase	636	down
ORF_2119	serine-type D-Ala-D-Ala carboxypeptidase	738	down
ORF_2129	integral membrane protein	462	down
ORF_2130	integral membrane protein	750	down
ORF_2132	metal-dependent regulator	648	down
ORF_2133	conserved hypothetical protein	345	down
ORF_2134	conserved hypothetical protein	465	down
ORF_2144	conserved hypothetical protein	126	down
ORF_2146	transcription regulator	1008	down
ORF_2147	heat shock protein HSP33	888	down
ORF_2152	conserved hypothetical protein	399	down
ORF_2174	hypothetical protein	126	down
ORF_2175	potassium uptake protein	1980	down
ORF_2177	alanine racemase	1128	down
ORF_2178	holo-	363	down
ORF_2184	3-hydroxyisobutyrate dehydrogenase	858	down
ORF_2185	integral membrane protein	774	down
ORF_2186	maltose O-acetyltransferase	555	down
ORF_2201	transcription regulator	510	down
ORF_2202	short-chain alcohol dehydrogenase/reductase	825	down
ORF_2203	conserved hypothetical protein	516	down
ORF_2206	conserved hypothetical protein	219	down
ORF_2214	cell surface hydrolase, membrane-bound (putative)	762	down
ORF_2215	cell surface protein precursor	1665	down
ORF_2216	conserved hypothetical protein	885	down
ORF_2217	nitroreductase	561	down
ORF_2221	LacI family sugar-binding transcriptional regulator	939	down
ORF_2223	oxidoreductase	978	down
ORF_2224	conserved hypothetical protein	114	down
ORF_2225	oxidoreductase	1020	down
ORF_2228	1-deoxy-D-xylulose-5-phosphate synthase	1752	down
ORF_2229	pyrazinamidase/nicotinamidase	555	down
ORF_2238	conserved hypothetical protein	357	down
ORF_2239	acetyltransferase	285	down
ORF_2242	thioredoxin H-type	321	down
ORF_2251	muramidase	2295	down
ORF_2257	transcription regulator	321	down
ORF_2263	YbaK/ebsC protein	504	down
ORF_2264	integral membrane protein	780	down
ORF_2269	small heat shock protein	420	down
ORF_2273	Na+/H+ antiporter	1593	down
ORF_2274	major facilitator superfamily multidrug transporter	1164	down
ORF_2277	integral membrane protein	348	down
ORF_2278	glucose-6-phosphate 1-dehydrogenase	1485	down
ORF_2279	aminotransferase with N	1365	down
ORF_2282	conserved hypothetical protein	135	down
ORF_2283	permease	366	down
ORF_2285	transcription regulator	897	down
ORF_2286	conserved hypothetical protein	642	down
ORF_2290	integral membrane protein	963	down
ORF_2291	orotate phosphoribosyltransferase	639	down
ORF_2292	orotidine-5'-phosphate decarboxylase	714	down
ORF_2293	dihydroorotate dehydrogenase 1B	918	down
ORF_2294	carbamoyl-phosphate synthase (glutamine-hydrolyzing), large subunit	3177	down
ORF_2295	carbamoyl-phosphate synthase (glutamine-hydrolyzing)	1095	down
ORF_2296	dihydroorotase	1293	down
ORF_2297	aspartate carbamoyltransferase catalytic subunit	936	down
ORF_2298	pyrimidine regulatory protein PyrR	543	down
ORF_2300	xanthine permease	1341	down
ORF_2301	conserved hypothetical protein	141	down
ORF_2308	conserved hypothetical protein	669	down
ORF_2309	phosphoribosylamine--glycine ligase	1242	down
ORF_2310	bifunctional purine biosynthesis protein PurH	1533	down
ORF_2311	phosphoribosylglycinamide formyltransferase	579	down
ORF_2312	phosphoribosylaminoimidazole synthetase	1026	down
ORF_2313	amidophosphoribosyltransferase	1455	down
ORF_2314	phosphoribosylformylglycinamidine synthase II	2220	down
ORF_2315	phosphoribosylformylglycinamidine synthase I	681	down
ORF_2316	purine biosynthesis cluster protein	255	down
ORF_2317	phosphoribosylaminoimidazole-succinocarboxamide synthase	732	down
ORF_2318	phosphoribosylaminoimidazole carboxylase ATPase subunit	1131	down
ORF_2319	phosphoribosylaminoimidazole carboxylase, catalytic subunit	486	down
ORF_2333	universal stress protein UspA	537	down
ORF_2334	Na+/H+ ion antiporter	237	down
ORF_2336	conserved hypothetical protein	474	down
ORF_2337	conserved hypothetical protein	327	down
ORF_2354	nicotinate phosphoribosyltransferase	1434	down
ORF_2358	D-serine ammonia-lyase	1311	down
ORF_2365	phosphoglycerate mutase	675	down
ORF_2366	conserved hypothetical protein	489	down
ORF_2370	phosphoglycerate dehydrogenase	951	down
ORF_2371	oxidoreductase	573	down
ORF_2374	cell surface protein precursor	3120	down
ORF_2375	cell surface protein precursor	2937	down
ORF_2378	amino acid transport protein	1437	down
ORF_2379	transcription regulator (putative)	456	down
ORF_2380	oxidoreductase	867	down
ORF_2381	organophosphate reductase	864	down
ORF_2382	transcription regulator	900	down
ORF_2394	conserved hypothetical protein	195	down
ORF_2403	conserved hypothetical protein	441	down
ORF_2404	conserved hypothetical protein	132	down
ORF_2409	lipoprotein precursor (putative)	987	down
ORF_2410	integral membrane protein	1023	down
ORF_2412	beta-lactamase	825	down
ORF_2414	purine operon repressor	837	down
ORF_2415	integral membrane protein	264	down
ORF_2420	cell surface hydrolase, membrane-bound (putative)	945	down
ORF_2421	conserved hypothetical protein	138	down
ORF_2422	4-diphosphocytidyl-2-C-methyl-D-erythritol kinase	867	down
ORF_2430	conserved hypothetical protein	390	down
ORF_2431	conserved hypothetical protein	120	down
ORF_2432	conserved hypothetical protein	843	down
ORF_2433	NAD-dependent deacetylase	705	down
ORF_2434	conserved hypothetical protein	960	down
ORF_2439	dihydrouridine synthase	1074	down
ORF_2451	integral membrane protein PlnW	687	down
ORF_2452	integral membrane protein plnV	681	down
ORF_2453	integral membrane protein PlnU	669	down
ORF_2456	bacteriocin ABC transporter, accessory factor PlnH	249	down
ORF_2457	PlnH	225	down
ORF_2458	bacteriocin ABC-transporter, ATP-binding and permease protein PlnG	2151	down
ORF_2459	bacteriocin precursor peptide PlnE (putative)	171	down
ORF_2460	membrane-bound protease CAAX family immunity protein PlnI	774	down
ORF_2461	response regulator PlnD, repressor	744	down
ORF_2462	response regulator PlnC, activator	744	down
ORF_2463	histidine protein kinase PlnB, sensor protein	795	down
ORF_2464	plantaricin A precursor peptide, induction factor	147	down
ORF_2465	immunity protein PlnP	747	down
ORF_2466	plantaricin biosynthesis protein PlnO	1200	down
ORF_2467	bacteriocin precursor peptide PlnN (putative)	168	down
ORF_2468	immunity protein PlnM	201	down
ORF_2481	integral membrane protein	264	down
ORF_2482	conserved hypothetical protein	918	down
ORF_2487	conserved hypothetical protein	669	down
ORF_2489	adenine deaminase	1692	down
ORF_2490	conserved hypothetical protein	1101	down
ORF_2491	ATP-dependent DNA helicase/translocase (putative)	834	down
ORF_2492	late competence protein	444	down
ORF_2499	phosphate ABC superfamily ATP binding cassette transporter, binding protein	876	down
ORF_2500	phosphate ABC transporter, permease protein	930	down
ORF_2501	phosphate ABC transporter, permease protein	885	down
ORF_2502	phosphate ABC transporter, ATP-binding protein	810	down
ORF_2503	phosphate ABC transporter, ATP-binding protein	756	down
ORF_2504	phosphate transport system protein	675	down
ORF_2505	stress-responsive transcription regulator (putative)	312	down
ORF_2506	integral membrane protein	366	down
ORF_2507	HPr kinase/phosphorylase	948	down
ORF_2508	prolipoprotein diacylglyceryl transferase	849	down
ORF_2509	NAD(P)H-dependent glycerol-3-phosphate dehydrogenase	1017	down
ORF_2511	diguanylate cyclase/phosphodiesterase domain-containing protein	681	down
ORF_2514	ORF-11	351	down
ORF_2515	ORF-12	285	down
ORF_2524	possible NADPH:quinone reductase	543	down
ORF_2527	lysozyme	807	down
ORF_2528	muramidase	453	down
ORF_2529	muramidase	411	down
ORF_2530	conserved hypothetical protein	660	down
ORF_2536	conserved hypothetical protein	378	down
ORF_2537	transcription regulator (putative)	585	down
ORF_2543	membrane protein	1074	down
ORF_2544	xylose operon regulator	450	down
ORF_2545	xylose operon regulator	642	down
ORF_2546	PFL4705 family integrating conjugative element protein	1038	down
ORF_2552	conserved hypothetical protein	435	down
ORF_2561	histidine protein kinase; sensor protein	1161	down
ORF_2562	response regulator	690	down
ORF_2565	guanosine 5'-monophosphate oxidoreductase	1152	down
ORF_2575	conserved hypothetical protein	834	down
ORF_2576	transcription regulator	897	down
ORF_2577	aminotransferase	1227	down
ORF_2582	conserved hypothetical protein	576	down
ORF_2590	ABC superfamily ATP binding cassette transporter, permease protein	756	down
ORF_2591	ABC transporter, ATP-binding protein	651	down
ORF_2595	cof family hydrolase	825	down
ORF_2596	fructokinase	864	down
ORF_2597	family 38 glycosyl hydrolase	2559	down
ORF_2598	phosphotransferase system fructose-specific component IIA	1101	down
ORF_2601	transcription regulator, mannitol operon	1905	down
ORF_2602	conserved hypothetical protein	459	down
ORF_2604	beta-glucosides PTS, EIIABC	1995	down
ORF_2609	conserved hypothetical protein	1257	down
ORF_2610	conserved hypothetical protein	600	down
ORF_2611	ferric uptake regulator	483	down
ORF_2612	bacteriocin immunity protein	357	down
ORF_2614	3',5'-cyclic-nucleotide phosphodiesterase	855	down
ORF_2619	conserved hypothetical protein	168	down
ORF_2625	cell surface hydrolase, membrane-bound (putative)	843	down
ORF_2626	glycerate kinase	1113	down
ORF_2627	glutathione reductase	1335	down
ORF_2628	conserved hypothetical protein	330	down
ORF_2629	adenylosuccinate lyase	1299	down
ORF_2630	adenylosuccinate synthase	1290	down
ORF_2631	guanosine 5'-monophosphate oxidoreductase	978	down
ORF_2632	protein-tyrosine phosphatase	786	down
ORF_2634	conserved hypothetical protein	150	down
ORF_2636	potassium uptake protein	2043	down
ORF_2637	cation efflux protein	945	down
ORF_2638	transport protein	1047	down
ORF_2641	quaternary ammonium compound-resistance protein	384	down
ORF_2642	quaternary ammonium compound-resistance protein	309	down
ORF_2644	ArsR family transcriptional regulator	345	down
ORF_2647	conserved hypothetical protein	234	down
ORF_2656	conserved hypothetical protein	153	down
ORF_2657	integral membrane protein (putative)	534	down
ORF_2660	conserved hypothetical protein	1095	down
ORF_2665	conserved hypothetical protein	330	down
ORF_2671	resolvase	174	down
ORF_2676	conserved hypothetical protein	393	down
ORF_2677	conserved hypothetical protein	393	down
ORF_2678	hydroxymethylglutaryl-CoA synthase	1170	down
ORF_2681	protein of hypothetical function DUF896	258	down
ORF_2683	1-acylglycerol-3-phosphate O-acyltransferase	636	down
ORF_2712	FAD synthetase	1002	down
ORF_2713	alpha-acetolactate decarboxylase	711	down
ORF_2714	heat-inducible transcription repressor	1044	down
ORF_2715	co-chaperone GrpE	609	down
ORF_2716	molecular chaperone DnaK	1869	down
ORF_2717	chaperone protein DnaJ	1143	down
ORF_2724	GTP-binding protein LepA	1836	down
ORF_2725	conserved hypothetical protein	291	down
ORF_2728	ribosomal protein L11 methyltransferase (putative)	951	down
ORF_2729	conserved hypothetical protein	753	down
ORF_2734	conserved hypothetical protein	843	down
ORF_2741	endonuclease IV	897	down
ORF_2765	conserved hypothetical protein	150	down
ORF_2766	ABC superfamily ATP binding cassette transporter, ABC protein	888	down
ORF_2767	ABC transporter, permease protein	771	down
ORF_2768	histidine protein kinase; sensor protein	1104	down
ORF_2769	response regulator	606	down
ORF_2773	transcription regulator	891	down
ORF_2774	conserved hypothetical protein	435	down
ORF_2775	NAD-dependent epimerase/dehydratase	642	down
ORF_2776	cell surface hydrolase (putative)	816	down
ORF_2777	transcription regulator	714	down
ORF_2778	galactoside O-acetyltransferase	609	down
ORF_2779	phosphoglycolate phosphatase	669	down
ORF_2780	conserved hypothetical protein	1680	down
ORF_2782	conserved hypothetical protein	390	down
ORF_2783	negative regulator of proteolysis	402	down
ORF_2784	7,8-dihydro-8-oxoguanine-triphosphatase (putative)	606	down
ORF_2785	transcription regulator	753	down
ORF_2786	NADH oxidase (putative)	1692	down
ORF_2787	succinyl-diaminopimelate desuccinylase	1146	down
ORF_2788	transcription regulator (putative)	450	down
ORF_2790	phosphopyruvate hydratase	1290	down
ORF_2791	cadmium-/manganese-transporting P-type ATPase	2277	down
ORF_2792	oxidoreductase	975	down
ORF_2793	conserved hypothetical protein	144	down
ORF_2796	transcription regulator	534	down
ORF_2797	conserved hypothetical protein	369	down
ORF_2798	phosphoenolpyruvate synthase	2397	down
ORF_2802	integral membrane protein	1206	down
ORF_2803	conserved hypothetical protein	708	down
ORF_2804	conserved hypothetical protein	1023	down
ORF_2805	peptidase T	1239	down
ORF_2806	chaperone protein ClpB	2604	down
ORF_2808	DNA-directed DNA polymerase III alpha subunit	3351	down
ORF_2818	integral membrane protein	585	down
ORF_2819	conserved hypothetical protein	1044	down
ORF_2820	ATP-dependent DNA helicase RecQ	1440	down
ORF_2826	conserved hypothetical protein	1269	down
ORF_2827	HAD superfamily hydrolase	798	down
ORF_2828	conserved hypothetical protein	135	down
ORF_2829	dihydrodipicolinate reductase	786	down
ORF_2830	tRNA CCA-pyrophosphorylase	1224	down
ORF_2832	ABC transporter, ATP-binding protein	1911	down
ORF_2833	thymidylate synthase	951	down
ORF_2834	dihydrofolate reductase	492	down
ORF_2855	ATP-dependent protease ATP-binding subunit	1419	down
ORF_2856	conserved hypothetical protein	879	down
ORF_2865	conserved hypothetical protein	855	down
ORF_2867	glycosyltransferase (putative)	1305	down
ORF_2868	integral membrane protein	408	down
ORF_2879	lipoprotein precursor	885	down
ORF_2881	conserved hypothetical protein	186	down
ORF_2883	conserved hypothetical protein	738	down
ORF_2888	conserved hypothetical protein	291	down
ORF_2890	integral membrane protein	291	down
ORF_2891	integral membrane protein	387	down
ORF_2897	ABC transporter, ATP-binding protein	900	down
ORF_2898	MutT/NUDIX family protein	495	down
ORF_2899	conserved hypothetical protein	726	down
ORF_2900	conserved hypothetical protein	372	down
ORF_2901	chloramphenicol O-acetyltransferase	669	down
ORF_2906	carbamoyl phosphate synthase large subunit	2562	down
ORF_2907	carbamoyl phosphate synthase small subunit	1083	down
ORF_2908	pyrimidine regulatory protein PyrR	525	down
ORF_2911	formate--tetrahydrofolate ligase	1656	down
ORF_2924	glycosyltransferase	1341	down
ORF_2925	conserved hypothetical protein	408	down
ORF_2933	ABC transporter, ATP-binding protein	954	down
ORF_2934	ABC transporter, substrate binding protein	1011	down
ORF_2936	hypothetical protein	114	down
ORF_2937	conserved hypothetical protein	501	down
ORF_2961	potassium transport protein	777	down
ORF_2967	hypothetical protein	120	down
ORF_2968	integral membrane protein	267	down
ORF_2969	conserved hypothetical protein	222	down
ORF_2970	conserved hypothetical protein	114	down
ORF_2974	conserved hypothetical protein	897	down
ORF_2976	conserved hypothetical protein	459	down
ORF_2977	sensory protein	486	down
ORF_2978	conserved hypothetical protein	249	down
ORF_2979	antibiotic biosynthesis monooxygenase subfamily	282	down
ORF_2980	chitin-binding protein/carbohydrate-binding protein	606	down
ORF_2986	integral membrane protein	867	down
ORF_3006	transcription regulator	987	down
ORF_3007	short chain dehydrogenase	813	down
ORF_3008	integral membrane protein	363	down
ORF_3009	alcohol dehydrogenase	1044	down
ORF_3010	aminohydrolase	1134	down
ORF_3025	conserved hypothetical protein	471	down
ORF_3026	cell surface protein	3756	down
ORF_3027	hypothetical protein	390	down
ORF_3039	acyl carrier protein	246	down
ORF_3041	DNA helicase RecG	2040	down
ORF_3052	methionyl-tRNA formyltransferase	954	down
ORF_3053	DNA replication factor Y	2418	down
ORF_3054	phosphopantothenoylcysteine decarboxylase/phosphopantothenate--cysteine ligase	1338	down
ORF_3058	glycine betaine/carnitine/choline ABC transporter, ATP-binding protein	654	down
ORF_3059	glycine betaine/carnitine/choline ABC transporter, substrate binding protein	936	down
ORF_3060	glycine betaine/carnitine/choline ABC transporter, permease protein	630	down
ORF_3061	ABC superfamily ATP binding cassette transporter, ABC protein	1185	down
ORF_3078	hypothetical protein	126	down
ORF_3089	conserved hypothetical protein	414	down
ORF_3102	conserved hypothetical protein	1191	down
ORF_3105	MarR family transcriptional regulator	360	down
ORF_3106	conserved hypothetical protein	510	down
ORF_3108	acylphosphatase (putative)	273	down
ORF_3110	integral membrane protein	579	down
ORF_3119	succinate-semialdehyde dehydrogenase (NAD(P)+)	591	down
ORF_3127	stress induced DNA binding protein (putative)	555	down
ORF_3128	conserved hypothetical protein	219	down
ORF_3129	transcription regulator	666	down
ORF_3130	endopeptidase PepO	1917	down
ORF_3134	oxidoreductase	954	down
ORF_3135	integral membrane protein	567	down
ORF_3136	oxidoreductase (putative)	1038	down
ORF_3140	conserved hypothetical protein	222	down
ORF_3145	conserved hypothetical protein	144	down
ORF_3146	conserved hypothetical protein	132	down
ORF_3147	conserved hypothetical protein	132	down
ORF_3148	conserved hypothetical protein	132	down
ORF_3149	conserved hypothetical protein	2763	down
ORF_3150	conserved hypothetical protein	1977	down
ORF_3151	transcription regulator (putative)	486	down

## Sheet: FS36h_PC36h
Gene	Product	Length
ORF_0007	conserved hypothetical protein	375	up
ORF_0008	conserved hypothetical protein	126	up
ORF_0009	conserved hypothetical protein	792	up
ORF_0028	L-2-hydroxyisocaproate dehydrogenase	927	up
ORF_0031	gluconate transport protein	1356	up
ORF_0032	gluconokinase	1515	up
ORF_0033	6-phosphogluconate dehydrogenase family protein	897	up
ORF_0034	glutathione reductase	1323	up
ORF_0043	hypothetical protein	150	up
ORF_0044	oligopeptide ABC superfamily ATP binding cassette transporter, binding protein	1506	up
ORF_0045	oligopeptide ABC transporter, permease protein	930	up
ORF_0046	oligopeptide ABC transporter, permease protein	1035	up
ORF_0047	oligopeptide ABC transporter, ATP-binding protein	1080	up
ORF_0048	oligopeptide ABC transporter, ATP-binding protein	966	up
ORF_0052	conserved hypothetical protein	198	up
ORF_0054	phosphoenolpyruvate--protein phosphatase	1731	up
ORF_0056	glycosyltransferase	1023	up
ORF_0057	integral membrane protein	1056	up
ORF_0059	aromatic amino acid aminotransferase	1188	up
ORF_0065	probable transcriptional regulator	213	up
ORF_0071	IS transposase	213	up
ORF_0082	tRNA uridine 5-carboxymethylaminomethyl modification enzyme GidA	1911	up
ORF_0083	tRNA modification GTPase TrmE	1392	up
ORF_0086	hypothetical protein	141	up
ORF_0097	30S ribosomal protein S18	237	up
ORF_0104	lipoprotein precursor, peptide binding protein OppA-like protein	1596	up
ORF_0115	conserved hypothetical protein	450	up
ORF_0116	cold shock protein CspA	201	up
ORF_0117	conserved hypothetical protein	225	up
ORF_0131	fumarate reductase, flavoprotein subunit precursor	2370	up
ORF_0144	4-hydroxyphenylacetate-3-hydroxylase	1437	up
ORF_0146	conserved hypothetical protein	624	up
ORF_0160	conserved hypothetical protein	168	up
ORF_0161	protein kinase	1737	up
ORF_0172	NADH oxidase	1353	up
ORF_0174	conserved hypothetical protein	306	up
ORF_0175	Na+/H+ antiporter NhaC	1425	up
ORF_0195	choloylglycine hydrolase	987	up
ORF_0196	copper transporting ATPase	2040	up
ORF_0198	transcription regulator	429	up
ORF_0206	MFS family major facilitator transporter, multidrug:cation symporter MdtG	1224	up
ORF_0207	cell surface hydrolase	939	up
ORF_0208	conserved hypothetical protein	471	up
ORF_0211	tyrosine--tRNA ligase	240	up
ORF_0228	NAD synthetase	828	up
ORF_0229	nicotinate phosphoribosyltransferase	1479	up
ORF_0234	transport protein	822	up
ORF_0239	conserved hypothetical protein	834	up
ORF_0240	di-/tripeptide transport protein	1473	up
ORF_0244	6-phospho-beta-glucosidase	1461	up
ORF_0265	oxidoreductase	1023	up
ORF_0266	galactose operon repressor	996	up
ORF_0267	aldose 1-epimerase	1035	up
ORF_0268	sugar transport protein	1959	up
ORF_0269	alpha-galactosidase	2217	up
ORF_0270	beta-galactosidase, small subunit	960	up
ORF_0271	beta-galactosidase large subunit	1881	up
ORF_0272	galactokinase	1164	up
ORF_0273	UDP-glucose 4-epimerase	1005	up
ORF_0274	UDP-glucose--hexose-1-phosphate uridylyltransferase	1464	up
ORF_0275	galactose operon repressor	1002	up
ORF_0283	transcription regulator of beta-galactosidase gene	1011	up
ORF_0284	beta-galactosidase I	2052	up
ORF_0285	lactose transport protein	1947	up
ORF_0286	branched-chain amino acid transport protein	540	up
ORF_0287	branched-chain amino acid transport protein	303	up
ORF_0288	transcription regulator	600	up
ORF_0290	ferrichrome ABC transporter, ATP-binding protein	795	up
ORF_0291	ferrichrome ABC transporter, permease protein	999	up
ORF_0292	ferrichrome ABC transporter, permease protein	996	up
ORF_0310	fumarate reductase	1482	up
ORF_0316	transcription antiterminator	834	up
ORF_0317	6-phospho-beta-glucosidase	1452	up
ORF_0318	beta-glucosides PTS, EIIBCA	1848	up
ORF_0329	multidrug transport protein (putative)	1416	up
ORF_0331	conserved hypothetical protein	1080	up
ORF_0332	conserved hypothetical protein	564	up
ORF_0333	prophage Lp4 protein 1, integrase	1158	up
ORF_0334	conserved hypothetical protein	669	up
ORF_0335	conserved hypothetical protein	669	up
ORF_0336	prophage Lp2 protein 8	432	up
ORF_0337	prophage Lp1 protein 8	378	up
ORF_0338	conserved hypothetical protein	210	up
ORF_0339	conserved hypothetical protein	273	up
ORF_0340	Gp40 protein	450	up
ORF_0341	conserved hypothetical protein	141	up
ORF_0342	hypothetical protein	171	up
ORF_0343	hypothetical protein	168	up
ORF_0344	conserved hypothetical protein	252	up
ORF_0345	conserved hypothetical protein	480	up
ORF_0346	Helicase-like protein:Type III restriction enzyme, res subunit:DEAD/DEAH box helicase-like protein	1260	up
ORF_0347	phage NTP-binding protein	717	up
ORF_0348	conserved hypothetical protein	600	up
ORF_0349	conserved hypothetical protein	555	up
ORF_0350	prophage Lp3 protein 7	795	up
ORF_0351	prophage Lp3 protein 8, helicase	1275	up
ORF_0352	phage protein	333	up
ORF_0353	conserved hypothetical protein	225	up
ORF_0354	prophage Lp1 protein 30	357	up
ORF_0355	hypothetical protein	435	up
ORF_0356	putative uncharacterized protein	183	up
ORF_0358	hypothetical protein	681	up
ORF_0359	hypothetical protein	171	up
ORF_0360	conserved hypothetical protein	216	up
ORF_0361	hypothetical protein	228	up
ORF_0362	putative uncharacterized protein	243	up
ORF_0363	terminase	1680	up
ORF_0364	phage portal protein, HK97 family	1143	up
ORF_0365	Clp protease domain protein	753	up
ORF_0366	major head protein Cps	1179	up
ORF_0367	putative uncharacterized protein	306	up
ORF_0368	Gp8 protein	213	up
ORF_0369	gp9 protein	408	up
ORF_0370	gp10 protein	423	up
ORF_0371	putative major tail protein	612	up
ORF_0372	putative uncharacterized protein	315	up
ORF_0373	hypothetical protein	222	up
ORF_0374	phage tail tape measure protein	4545	up
ORF_0375	putative uncharacterized protein	822	up
ORF_0376	reticulocyte binding protein	4947	up
ORF_0377	conserved hypothetical protein	483	up
ORF_0378	conserved hypothetical protein	435	up
ORF_0379	conserved hypothetical protein	378	up
ORF_0380	conserved hypothetical protein	273	up
ORF_0381	conserved hypothetical protein	285	up
ORF_0382	prophage Lp2 protein 56, lysin	933	up
ORF_0387	conserved hypothetical protein	432	up
ORF_0388	manganese transport protein	1593	up
ORF_0399	CBS domain protein	636	up
ORF_0408	nitroreductase	654	up
ORF_0409	transcription regulator	537	up
ORF_0410	multidrug ABC transporter, ATP-binding and permease protein	1758	up
ORF_0419	possible toxin regulator	1095	up
ORF_0423	integral membrane protein	972	up
ORF_0424	conserved hypothetical protein	1449	up
ORF_0452	CAAX family protease	1206	up
ORF_0453	conserved hypothetical protein	831	up
ORF_0471	maltose O-acetyltransferase	570	up
ORF_0496	ABC transporter, permease protein (putative)	1218	up
ORF_0497	ABC superfamily ATP binding cassette transporter, ABC protein	900	up
ORF_0500	transcription regulator (putative)	567	up
ORF_0525	copper-exporting ATPase	375	up
ORF_0526	copper-exporting ATPase	270	up
ORF_0527	P-ATPase superfamily P-type ATPase copper transporter	1866	up
ORF_0530	extracellular protein	396	up
ORF_0556	ABC transporter substrate binding protein	894	up
ORF_0559	extracellular protein	663	up
ORF_0560	extracellular protein	615	up
ORF_0563	6-phospho-beta-glucosidase	1383	up
ORF_0564	cellobiose PTS, EIIC	1473	up
ORF_0565	cellobiose PTS, EIIB	327	up
ORF_0568	transcription regulator	822	up
ORF_0576	amino acid transport protein	702	up
ORF_0577	integral membrane protein	327	up
ORF_0594	conserved hypothetical protein	1233	up
ORF_0595	dipeptidase	1407	up
ORF_0596	conserved hypothetical protein	135	up
ORF_0597	aspartate--ammonia ligase	1008	up
ORF_0598	asparaginyl-tRNA synthetase	1296	up
ORF_0599	acyl carrier protein phosphodiesterase	630	up
ORF_0600	transcription regulator	474	up
ORF_0639	conserved hypothetical protein	267	up
ORF_0650	phosphoglycerate mutase	678	up
ORF_0653	GTPase	1296	up
ORF_0654	transcription regulator (putative)	561	up
ORF_0655	transport protein	558	up
ORF_0667	glutamine ABC superfamily ATP binding cassette transporter, permease protein	642	up
ORF_0683	amino acid permease	1398	up
ORF_0684	transposase	303	up
ORF_0686	Xaa-Pro dipeptidyl-peptidase	2442	up
ORF_0689	prolyl aminopeptidase	930	up
ORF_0692	pyruvate oxidase	1740	up
ORF_0696	lipopolysaccharide biosynthesis protein LicD	810	up
ORF_0697	exopolyphosphatase	1530	up
ORF_0698	polyphosphate kinase	2157	up
ORF_0699	exopolyphosphatase	954	up
ORF_0706	hypothetical protein	135	up
ORF_0708	conserved hypothetical protein	747	up
ORF_0712	group 2 glycosyl transferase	126	up
ORF_0714	conserved hypothetical protein	234	up
ORF_0715	cobalt ABC transporter, ATP-binding protein (putative)	732	up
ORF_0731	conserved hypothetical protein	1593	up
ORF_0732	NTP pyrophosphohydrolase	471	up
ORF_0733	amino acid transport protein	1365	up
ORF_0747	transport protein	1194	up
ORF_0753	conserved hypothetical protein	1518	up
ORF_0755	ABC transporter, permease protein	840	up
ORF_0756	ABC superfamily ATP binding cassette transporter, ABC protein	1701	up
ORF_0757	conserved hypothetical protein	561	up
ORF_0758	conserved hypothetical protein	129	up
ORF_0759	transcription regulator	753	up
ORF_0762	conserved hypothetical protein	813	up
ORF_0763	conserved hypothetical protein	492	up
ORF_0772	glycerone kinase	999	up
ORF_0773	dihydroxyacetone kinase phosphatase domain-containing protein	582	up
ORF_0774	conserved hypothetical protein	369	up
ORF_0775	glycerol uptake facilitator protein	708	up
ORF_0777	transcription regulator	963	up
ORF_0778	alpha-glucosidase	1674	up
ORF_0779	maltose ABC superfamily ATP binding cassette transporter, maltose-binding protein	1254	up
ORF_0780	maltose/maltodextrin ABC transporter, permease protein	1290	up
ORF_0781	maltose/maltodextrin ABC transporter, permease protein	885	up
ORF_0782	maltodextrose utilization protein MalA	831	up
ORF_0783	alpha-amylase	1323	up
ORF_0784	multiple sugar ABC transporter, ATP-binding protein	1107	up
ORF_0785	maltose phosphorylase	2271	up
ORF_0788	fructokinase	867	up
ORF_0789	sucrose PTS, EIIBCA	1956	up
ORF_0790	beta-fructofuranosidase	1506	up
ORF_0791	sucrose operon repressor	981	up
ORF_0792	alpha-glucosidase	1677	up
ORF_0793	oxidoreductase	915	up
ORF_0794	Na+/H+ antiporter NhaC	1401	up
ORF_0797	conserved hypothetical protein	474	up
ORF_0799	2,3-cyclic-nucleotide 2-phosphodiesterase, putative	1551	up
ORF_0815	transcription regulator	639	up
ORF_0816	phosphoenolpyruvate carboxykinase (ATP)	1662	up
ORF_0819	extracellular protein, gamma-D-glutamate-meso-diaminopimelate muropeptidase (putative)	1068	up
ORF_0825	conserved hypothetical protein	579	up
ORF_0826	iron dependent peroxidase (putative)	954	up
ORF_0827	ubiquinone/menaquinone biosynthesis methyltransferase	714	up
ORF_0828	conserved hypothetical protein	696	up
ORF_0830	NADH peroxidase	1356	up
ORF_0835	homoserine O-succinyltransferase	876	up
ORF_0836	O-acetylhomoserine (thiol)-lyase	1287	up
ORF_0837	homoserine dehydrogenase	1281	up
ORF_0839	2-dehydropantoate 2-reductase	975	up
ORF_0842	ring-cleaving dioxygenase (putative)	450	up
ORF_0848	transcription regulator, AsnC-type	465	up
ORF_0858	unknown	270	up
ORF_0859	conserved hypothetical protein	1344	up
ORF_0864	glucose-6-phosphate isomerase	1353	up
ORF_0877	glycine betaine/carnitine/choline ABC transporter, substrate binding and permease protein	1527	up
ORF_0880	glycerol kinase	1518	up
ORF_0881	glycerol-3-phosphate dehydrogenase	1830	up
ORF_0882	glycerol uptake facilitator protein	720	up
ORF_0888	Ribonucleoside-diphosphate reductase beta subunit	933	up
ORF_0889	ribonucleoside-diphosphate reductase beta subunit	951	up
ORF_0890	conserved hypothetical protein	564	up
ORF_0893	transcription regulator	156	up
ORF_0894	transcription regulator	165	up
ORF_0895	acetoin(diacetyl)reductase	771	up
ORF_0896	S-ribosylhomocysteinase	474	up
ORF_0897	conserved hypothetical protein	861	up
ORF_0898	amino acid ABC transporter, permease protein	678	up
ORF_0899	ABC superfamily ATP binding cassette transporter, binding protein	1077	up
ORF_0900	GAF domain protein	480	up
ORF_0901	APC family amino acid-polyamine-organocation transporter	213	up
ORF_0902	amino acid permease-associated region	1386	up
ORF_0903	Hin-like DNA-binding protein	288	up
ORF_0904	hypothetical protein	162	up
ORF_0905	hypothetical protein	129	up
ORF_0926	argininosuccinate synthase	1236	up
ORF_0927	argininosuccinate lyase	1404	up
ORF_0932	lipoprotein precursor, peptide binding protein OppA-like protein	1653	up
ORF_0938	phosphoglycerate kinase	1203	up
ORF_0942	chloride channel protein	1554	up
ORF_0945	ribonuclease R	2415	up
ORF_0946	SsrA-binding protein	471	up
ORF_0948	glutamine ABC superfamily ATP binding cassette transporter, substrate binding and permease protein	1437	up
ORF_0949	glutamine ABC transporter, ATP-binding protein	735	up
ORF_0963	protein of hypothetical function DUF147	843	up
ORF_0964	conserved hypothetical protein	978	up
ORF_0965	phosphoglucosamine mutase	1356	up
ORF_0967	D-fructose-6-phosphate amidotransferase	1818	up
ORF_0968	diguanylate cyclase/phosphodiesterase domain 2 containing protein	666	up
ORF_0969	HAD superfamily hydrolase	816	up
ORF_0975	conserved hypothetical protein	837	up
ORF_0976	conserved hypothetical protein	330	up
ORF_0979	peptidylprolyl isomerase	585	up
ORF_0987	amino acid transport protein	1386	up
ORF_1001	catabolite control protein A	1011	up
ORF_1003	Xaa-Pro dipeptidase	1110	up
ORF_1021	alanine--tRNA ligase	2643	up
ORF_1036	accesory gene regulator protein B	603	up
ORF_1037	accessory gene regulator protein C	1263	up
ORF_1038	response regulator; accesory gene regulator protein A	744	up
ORF_1041	integral membrane protein	246	up
ORF_1042	conserved hypothetical protein	135	up
ORF_1063	putative phosphoketolase	2391	up
ORF_1064	transcription regulator	768	up
ORF_1065	galacitol PTS, EIIA	471	up
ORF_1066	galactitol PTS, EIIB	297	up
ORF_1067	galacitol PTS, EIIC	1272	up
ORF_1068	L-iditol 2-dehydrogenase	1110	up
ORF_1080	sugar transport protein	1422	up
ORF_1083	transcription antiterminator	849	up
ORF_1084	beta-glucosides PTS, EIIBCA	2001	up
ORF_1085	6-phospho-beta-glucosidase	1464	up
ORF_1086	6-phospho-beta-glucosidase	1443	up
ORF_1095	integral membrane protein	516	up
ORF_1097	formate C-acetyltransferase	2259	up
ORF_1098	formate acetyltransferase activating enzyme	687	up
ORF_1100	oxidoreductase	921	up
ORF_1106	CAAX family membrane-bound protease	762	up
ORF_1108	extracellular protein	804	up
ORF_1109	extracellular protein	639	up
ORF_1115	acetate kinase	1197	up
ORF_1122	spermidine/putrescine ABC transporter, substrate binding protein	1071	up
ORF_1123	spermidine/putrescine ABC transporter, permease protein	816	up
ORF_1124	spermidine/putrescine ABC superfamily ATP binding cassette transporter, permease protein	834	up
ORF_1135	fructose-bisphosphate aldolase	864	up
ORF_1137	sugar transport protein	1317	up
ORF_1138	conserved hypothetical protein	903	up
ORF_1139	conserved hypothetical protein	201	up
ORF_1152	AMT family ammonium or ammonia transporter	1263	up
ORF_1153	L-2-hydroxyisocaproate dehydrogenase	960	up
ORF_1154	integral membrane protein	270	up
ORF_1158	integral membrane protein	369	up
ORF_1164	ribonucleoside hydrolase RihC	921	up
ORF_1175	putative uncharacterized protein	945	up
ORF_1177	methylated-DNA--	501	up
ORF_1181	type III restriction protein res subunit	1377	up
ORF_1183	conserved hypothetical protein	2016	up
ORF_1184	hypothetical protein	465	up
ORF_1185	conserved hypothetical protein	120	up
ORF_1187	serine O-acetyltransferase	177	up
ORF_1191	alpha-D-GlcNAc alpha-1,2-L-rhamnosyltransferase	228	up
ORF_1192	IS30 family transposase	921	up
ORF_1195	negative regulator of proteolysis	399	up
ORF_1203	copper homeostasis protein CutC	639	up
ORF_1204	conserved hypothetical protein	1020	up
ORF_1208	rRNA large subunit methyltransferase A	855	up
ORF_1214	hypothetical protein	120	up
ORF_1225	cell division protein FtsA	1347	up
ORF_1226	cell division protein FtsZ	1284	up
ORF_1227	cell division protein (putative)	423	up
ORF_1228	YlmG protein	270	up
ORF_1229	cell division protein (putative)	786	up
ORF_1230	cell division initiation protein DivIVA	699	up
ORF_1231	isoleucyl-tRNA synthetase	2799	up
ORF_1253	extracellular protein, gamma-D-glutamate-meso-diaminopimelate muropeptidase (putative)	1491	up
ORF_1259	peptide deformylase	567	up
ORF_1260	pyruvate dehydrogenase complex, E1 component, alpha subunit	1113	up
ORF_1261	pyruvate dehydrogenase complex, E1 component, beta subunit	732	up
ORF_1262	pyruvate dehydrogenase complex dihydrolipoamide acetyltransferase	1317	up
ORF_1263	dihydrolipoamide dehydrogenase	1413	up
ORF_1276	amino acid transport protein	1383	up
ORF_1277	homocysteine methyltransferase	930	up
ORF_1292	leucyl-tRNA synthetase	2427	up
ORF_1332	bifunctional homocysteine S-methyltransferase/5,10-methylenetetrahydrofolate reductase protein	1857	up
ORF_1333	5-methyltetrahydropteroyltriglutamate--homocysteine S-methyltransferase	2307	up
ORF_1363	arginine catabolic regulator	462	up
ORF_1374	oxidoreductase (putative)	615	up
ORF_1388	Pyrimidine reductase, riboflavin biosynthesis	1068	up
ORF_1389	riboflavin synthase, alpha subunit	603	up
ORF_1390	GTP cyclohydrolase II	1215	up
ORF_1391	riboflavin synthase, beta chain	480	up
ORF_1392	conserved hypothetical protein	561	up
ORF_1403	peptidylprolyl isomerase	897	up
ORF_1414	conserved hypothetical protein	165	up
ORF_1415	FeoB family ferrous iron (Fe2+) uptake protein	1989	up
ORF_1416	conserved hypothetical protein	225	up
ORF_1431	threonine-tRNA ligase 1	1965	up
ORF_1451	hypothetical protein	117	up
ORF_1458	hypothetical protein	228	up
ORF_1459	hypothetical protein	204	up
ORF_1460	conserved hypothetical protein	336	up
ORF_1462	hypothetical protein	114	up
ORF_1463	plasmid replication initiation protein	405	up
ORF_1470	conserved hypothetical protein	252	up
ORF_1471	conserved hypothetical protein	933	up
ORF_1472	putative glycosyl transferase	990	up
ORF_1473	polysaccharide polymerase	1230	up
ORF_1474	putative glycosyl transferase	960	up
ORF_1475	putative lipopolysaccharide biosynthesis protein	1428	up
ORF_1476	capsular polysaccharide biosynthesis protein CpsI	1020	up
ORF_1477	CDP-glycerol:poly(glycerophosphate) glycerophosphotransferase	1194	up
ORF_1478	EpsIIN, glycerol-3-phosphate cytidylyltransferase	375	up
ORF_1487	acetate kinase	1188	up
ORF_1489	integral membrane protein	351	up
ORF_1490	integral membrane protein	384	up
ORF_1492	ABC transporter, permease protein	660	up
ORF_1493	ABC transporter, ATP-binding protein	1407	up
ORF_1494	ABC transporter subunit (putative)	570	up
ORF_1501	dipeptidase	1416	up
ORF_1503	transcription regulator	2076	up
ORF_1504	mannitol PTS, EIIA	450	up
ORF_1505	mannitol-1-phosphate 5-dehydrogenase	1158	up
ORF_1506	conserved hypothetical protein	552	up
ORF_1509	conserved hypothetical protein	324	up
ORF_1510	nucleoside-diphosphate kinase	465	up
ORF_1521	serine O-acetyltransferase	543	up
ORF_1522	cystathionine beta-lyase	1146	up
ORF_1523	cysteine synthase	912	up
ORF_1547	cellobiose PTS, EIIC	1326	up
ORF_1554	transcription regulator (putative)	573	up
ORF_1555	transport protein	3954	up
ORF_1581	trigger factor	1323	up
ORF_1587	glutamine ABC superfamily ATP binding cassette transporter, substrate binding and permease protein	1476	up
ORF_1588	glutamine ABC transporter, ATP-binding protein	741	up
ORF_1600	fructose PTS, EIIABC	1968	up
ORF_1612	integral membrane protein	1212	up
ORF_1613	conserved hypothetical protein	348	up
ORF_1626	ABC transporter, permease protein (putative)	1068	up
ORF_1627	ABC transporter, ATP-binding protein	681	up
ORF_1629	purine nucleosidase	981	up
ORF_1637	conserved hypothetical protein	843	up
ORF_1639	lipoprotein precursor, peptide binding protein OppA-like protein	1662	up
ORF_1640	possible acetyltransferase	444	up
ORF_1641	phosphoglycerate dehydrogenase	1179	up
ORF_1642	phosphoserine aminotransferase	1074	up
ORF_1643	phosphoglycerate mutase	624	up
ORF_1645	conserved hypothetical protein	222	up
ORF_1646	conserved hypothetical protein	351	up
ORF_1647	adherence protein	366	up
ORF_1679	zinc-dependent proteinase	1302	up
ORF_1680	conserved hypothetical protein	1266	up
ORF_1682	aspartate kinase	1353	up
ORF_1683	glutamine ABC transporter, substrate binding protein	840	up
ORF_1684	glutamine ABC transporter, ATP-binding protein	642	up
ORF_1685	glutamine ABC transporter, permease protein	642	up
ORF_1693	valyl-tRNA synthetase	2670	up
ORF_1701	30S ribosomal protein S4	609	up
ORF_1702	conserved hypothetical protein	627	up
ORF_1704	integral membrane protein	627	up
ORF_1705	ArsR family transcription regulator	279	up
ORF_1717	amino acid ABC transporter, substrate binding protein	825	up
ORF_1718	amino acid ABC transporter, permease protein	693	up
ORF_1719	amino acid ABC transporter, ATP-binding protein	1032	up
ORF_1748	branched-chain amino acid aminotransferase	1029	up
ORF_1795	immunity repressor protein (phage-related protein)	321	up
ORF_1796	conserved hypothetical protein	423	up
ORF_1797	prophage Lp1 protein 2	720	up
ORF_1798	HsdR family type I site-specific deoxyribonuclease	3138	up
ORF_1799	HsdS, type I site-specific deoxyribonuclease	1188	up
ORF_1822	conserved hypothetical protein	234	up
ORF_1826	pyruvate oxidase	1812	up
ORF_1841	hypothetical protein	372	up
ORF_1843	transcription regulator	777	up
ORF_1844	N-acetylglucosamine and glucose PTS, EIICBA	1908	up
ORF_1845	mannose-6-phosphate isomerase	1332	up
ORF_1847	conserved hypothetical protein	498	up
ORF_1848	N-acetylglucosamine and glucose PTS, EIICBA	1869	up
ORF_1849	mannose-6-phosphate isomerase	1344	up
ORF_1850	hypothetical protein	123	up
ORF_1851	6-phospho-beta-glucosidase	1458	up
ORF_1852	phosphoenolpyruvate-dependent sugar phosphotransferase system EIIC, putative cellobiose specific	1293	up
ORF_1858	sugar transport protein	1386	up
ORF_1859	alpha-glucosidase	1677	up
ORF_1887	putative ribose uptake protein rbsU	885	up
ORF_1888	D-ribose pyranase	396	up
ORF_1889	ribokinase	921	up
ORF_1892	xylose isomerase	1350	up
ORF_1894	alpha-glucosidase, family 31 of glycosyl hydrolase	2289	up
ORF_1895	RecName: Full=Putative xylose-proton symporter; AltName: Full=Xylose transporter >gi|3688059|gb|AAC62250.1| isoprimeverose cation-symporter XylP	1440	up
ORF_1896	bifunctional acetaldehyde-CoA/alcohol dehydrogenase	2604	up
ORF_1898	regulator of phenolic acid metabolism PadR	546	up
ORF_1899	p-coumaric acid decarboxylase	537	up
ORF_1900	2-oxo-hept-3-ene-1,7-dioate hydratase; 2-oxo-hept-4-ene-1,7-dioate hydratase	801	up
ORF_1930	16S RNA methylase	609	up
ORF_1933	ribonucleotide-diphosphate reductase subunit beta	1011	up
ORF_1935	Lysyl-tRNA synthetase (class II)	2604	up
ORF_1936	prophage Lp1 protein 66, lipoprotein precursor	669	up
ORF_1937	prophage Lp1 protein 65	978	up
ORF_1938	ribosomal protein L7/L12	369	up
ORF_1939	ribosomal protein L10	504	up
ORF_1940	50S ribosomal protein L1	690	up
ORF_1941	50S ribosomal protein L11	426	up
ORF_1951	glutamyl-tRNA synthetase	1491	up
ORF_1956	acetyltransferase (putative)	297	up
ORF_1957	ribose-5-phosphate isomerase A	684	up
ORF_1958	cysteine aminopeptidase	1332	up
ORF_1961	transport protein	1026	up
ORF_1962	malate transport protein	963	up
ORF_1977	bacteriocin activator	156	up
ORF_1978	DNA methylase N-4/N-6	198	up
ORF_1987	UDP-N-acetylglucosamine 2-epimerase	1119	up
ORF_1993	conserved hypothetical protein	441	up
ORF_1995	cell surface hydrolase (putative)	867	up
ORF_2001	cold shock protein CspP	201	up
ORF_2033	amino acid transport protein	1428	up
ORF_2034	malate transport protein	972	up
ORF_2035	malate dehydrogenase	1644	up
ORF_2039	fumarate reductase subunit A	1389	up
ORF_2040	fumarate hydratase	1383	up
ORF_2047	citrate lyase regulator	963	up
ORF_2051	manganese ABC transporter, substrate binding protein	942	up
ORF_2052	manganese ABC superfamily ATP binding cassette transporter, permease protein	876	up
ORF_2053	manganese ABC transporter, ATP-binding protein	738	up
ORF_2054	triphosphoribosyl-dephospho-CoA synthase	843	up
ORF_2055	transcription regulator	1026	up
ORF_2058	conserved hypothetical protein	327	up
ORF_2060	3-dehydroquinate synthase	1080	up
ORF_2061	3-deoxy-7-phosphoheptulonate synthase	996	up
ORF_2062	shikimate 5-dehydrogenase	894	up
ORF_2063	transketolase	2013	up
ORF_2064	possible malate dehydrogenase	1089	up
ORF_2067	30S ribosomal protein S9	393	up
ORF_2068	50S ribosomal protein L13	444	up
ORF_2080	ribosomal protein L17	384	up
ORF_2081	DNA-directed RNA polymerase subunit alpha	945	up
ORF_2082	30S ribosomal protein S11	390	up
ORF_2083	30S ribosomal protein S13	366	up
ORF_2084	translation initiation factor IF-1	219	up
ORF_2085	adenylate kinase	660	up
ORF_2086	preprotein translocase subunit SecY	1134	up
ORF_2087	ribosomal protein L15	432	up
ORF_2088	50S ribosomal protein L30	183	up
ORF_2089	30S ribosomal protein S5	501	up
ORF_2090	ribosomal protein L18	357	up
ORF_2091	50S ribosomal protein L6	537	up
ORF_2092	30S ribosomal protein S8	396	up
ORF_2093	50S ribosomal protein L5	543	up
ORF_2094	ribosomal protein L24	312	up
ORF_2095	ribosomal protein L14	369	up
ORF_2096	30S ribosomal protein S17	270	up
ORF_2097	50S ribosomal protein L29	195	up
ORF_2098	50S ribosomal protein L16	435	up
ORF_2099	30S ribosomal protein S3	654	up
ORF_2100	50S ribosomal protein L22	348	up
ORF_2101	30S ribosomal protein S19	276	up
ORF_2102	50S ribosomal protein L2	840	up
ORF_2103	50S ribosomal protein L23	294	up
ORF_2107	elongation factor G	2097	up
ORF_2108	30S ribosomal protein S7	471	up
ORF_2109	30S ribosomal protein S12	414	up
ORF_2111	DNA-directed RNA polymerase subunit beta'	3654	up
ORF_2117	seryl-tRNA synthetase	1278	up
ORF_2122	conserved hypothetical protein	117	up
ORF_2123	acetolactate synthase	1683	up
ORF_2128	transcription regulator	1038	up
ORF_2131	cold shock protein CspC	201	up
ORF_2136	conserved hypothetical protein	723	up
ORF_2137	hypothetical protein	132	up
ORF_2141	lysin	1302	up
ORF_2142	conserved hypothetical protein	666	up
ORF_2159	conserved hypothetical protein	639	up
ORF_2161	proline-specific peptidase	906	up
ORF_2162	oligopeptide ABC superfamily ATP binding cassette transporter substrate binding protein	1626	up
ORF_2164	ornithine carbamoyltransferase	1023	up
ORF_2165	acetylornithine aminotransferase	1170	up
ORF_2166	acetylglutamate kinase	747	up
ORF_2167	bifunctional ornithine acetyltransferase/N-acetylglutamate synthase protein	1209	up
ORF_2168	N-acetyl-gamma-glutamyl-phosphate reductase	1026	up
ORF_2169	carbamoyl phosphate synthase small subunit	1068	up
ORF_2170	carbamoyl-phosphate synthase, large subunit	3063	up
ORF_2171	ABC superfamily ATP binding cassette transporter, ABC protein	771	up
ORF_2172	Putative aliphatic sulfonates transport permease protein ssuC	1014	up
ORF_2173	NMT1/THI5 like protein	1053	up
ORF_2181	exopolysaccharide biosynthesis protein	771	up
ORF_2187	histidinol-phosphate transaminase	1071	up
ORF_2188	phosphoribosyl-ATP pyrophosphatase	321	up
ORF_2191	phosphoribosylformimino-5-aminoimidazole carboxamideribotide isomerase	720	up
ORF_2192	imidazole glycerol phosphate synthase subunit HisH	627	up
ORF_2193	imidazoleglycerol-phosphate dehydratase	585	up
ORF_2194	histidinol dehydrogenase	1287	up
ORF_2195	ATP phosphoribosyltransferase	657	up
ORF_2196	histidine--tRNA ligase (putative)	1152	up
ORF_2197	histidinol-phosphatase	819	up
ORF_2199	MIT family Mg2+ and Co2+ transporter	909	up
ORF_2200	conserved hypothetical protein	348	up
ORF_2204	aspartate-semialdehyde dehydrogenase	1062	up
ORF_2208	integral membrane protein	2685	up
ORF_2212	glycerophosphodiester phosphodiesterase	1794	up
ORF_2213	thioredoxin reductase (NADPH)	996	up
ORF_2219	ribonuclease H (putative)	897	up
ORF_2222	transcription regulator	864	up
ORF_2226	Na(+)/H(+) antiporter	2004	up
ORF_2227	conserved hypothetical protein	129	up
ORF_2233	conserved hypothetical protein	282	up
ORF_2234	alpha/beta hydrolase	924	up
ORF_2237	conserved hypothetical protein	852	up
ORF_2240	pyruvate oxidase	1758	up
ORF_2243	cystathionine gamma-synthase	1122	up
ORF_2245	conserved hypothetical protein	663	up
ORF_2246	conserved hypothetical protein	507	up
ORF_2258	BetT protein	198	up
ORF_2259	glycosyltransferase (putative)	1176	up
ORF_2260	phosphoketolase	2367	up
ORF_2267	conserved hypothetical protein	525	up
ORF_2272	conserved hypothetical protein	486	up
ORF_2287	acetyltransferase (putative)	525	up
ORF_2288	ATP-dependent nuclease subunit A	3750	up
ORF_2289	exonuclease RexB	3606	up
ORF_2299	purine transport regulator	1590	up
ORF_2320	NADPH-dependent FMN reductase domain protein	1296	up
ORF_2343	threonine synthase	1494	up
ORF_2344	cof family hydrolase	798	up
ORF_2345	pentapeptide repeats containing protein	636	up
ORF_2356	ABC superfamily ATP binding cassette transporter, permease protein	1212	up
ORF_2357	ABC transporter, ATP-binding protein	744	up
ORF_2363	transcription regulator	708	up
ORF_2367	HAD superfamily hydrolase	834	up
ORF_2368	2-dehydropantoate 2-reductase	1020	up
ORF_2369	transport protein	927	up
ORF_2383	capsular polysaccharide biosynthesis protein	807	up
ORF_2384	exopolysaccharide biosynthesis protein; chain length determinator Wzz	564	up
ORF_2387	heat shock protein HtpX	900	up
ORF_2390	conserved hypothetical protein	1137	up
ORF_2393	UDP-N-acetylglucosamine 1-carboxyvinyltransferase	1281	up
ORF_2399	serine--tRNA ligase	1272	up
ORF_2401	CTP synthetase	1614	up
ORF_2418	zinc/iron ABC transporter, permease protein	804	up
ORF_2419	zinc/iron ABC transporter, ATP-binding protein	699	up
ORF_2427	drug resistance transporter	1185	up
ORF_2428	methionine--tRNA ligase	2052	up
ORF_2437	conserved hypothetical protein	795	up
ORF_2444	conserved hypothetical protein	423	up
ORF_2445	conserved hypothetical protein	189	up
ORF_2446	cellobiose PTS, EIIC	1362	up
ORF_2447	transcription regulator	711	up
ORF_2448	tryptophanyl-tRNA synthetase II	1017	up
ORF_2449	carbon-nitrogen family hydrolase	777	up
ORF_2472	Na(+)/H(+) antiporter	1185	up
ORF_2473	LIVCS family branched chain amino acid:cation symporter	1377	up
ORF_2475	transcription regulator	873	up
ORF_2476	HAD superfamily hydrolase	792	up
ORF_2477	transport protein	1155	up
ORF_2478	galactoside O-acetyltransferase	618	up
ORF_2486	conserved hypothetical protein	180	up
ORF_2488	conserved hypothetical protein	1185	up
ORF_2516	NrdI family protein	438	up
ORF_2517	ribonucleoside-diphosphate reductase	2169	up
ORF_2518	ribonucleoside-diphosphate reductase beta subunit	927	up
ORF_2519	ribonucleoside-diphosphate reductase beta subunit	951	up
ORF_2526	malate dehydrogenase (putative)	1089	up
ORF_2549	serine/threonine protein kinase	1065	up
ORF_2564	peptidyl-prolyl cis-trans isomerase	930	up
ORF_2566	integral membrane protein	726	up
ORF_2567	translation-associated GTPase	1101	up
ORF_2568	conserved hypothetical protein	192	up
ORF_2569	chromosome partitioning protein, DNA-binding protein	891	up
ORF_2570	chromosome partitioning protein, membrane-associated ATPase	768	up
ORF_2571	chromosome partitioning protein, DNA-binding protein	852	up
ORF_2572	16S rRNA methyltransferase GidB	735	up
ORF_2573	nucleoside transport protein	1284	up
ORF_2581	amino acid ABC transporter, substrate binding protein	816	up
ORF_2583	transcription regulator (putative)	318	up
ORF_2584	integral membrane protein (putative)	639	up
ORF_2585	conserved hypothetical protein	936	up
ORF_2615	acetyltransferase (putative)	552	up
ORF_2620	zinc-dependent proteinase (putative)	699	up
ORF_2621	conserved hypothetical protein	129	up
ORF_2622	squalene synthase	1497	up
ORF_2623	phytoene synthase	882	up
ORF_2624	hypothetical protein	117	up
ORF_2633	cardiolipin synthetase 2	1449	up
ORF_2639	conserved hypothetical protein	123	up
ORF_2640	conserved hypothetical protein	1119	up
ORF_2643	hemolysin III	639	up
ORF_2648	conserved hypothetical protein	168	up
ORF_2658	ABC superfamily ATP binding cassette transporter, binding protein	981	up
ORF_2664	4'-phosphopantetheinyl transferase, CesP	717	up
ORF_2666	PTS system mannose/fructose/N-acetylgalactosamine-specific transporter subunit IID	846	up
ORF_2667	phosphotransferase system, mannose/fructose/N-acetylgalactosamine-specific component IIC	849	up
ORF_2668	Fructose/mannose phosphotransferase system IIB component	495	up
ORF_2669	levA protein	435	up
ORF_2670	transcriptional activator	2529	up
ORF_2680	LexA repressor	633	up
ORF_2686	D-lactate dehydrogenase	999	up
ORF_2695	prolyl-tRNA synthetase	1710	up
ORF_2705	transport protein	1455	up
ORF_2706	chorismate synthase	1170	up
ORF_2707	conserved hypothetical protein	528	up
ORF_2708	3-phosphoshikimate 1-carboxyvinyltransferase	1299	up
ORF_2709	prephenate dehydrogenase	1098	up
ORF_2710	shikimate kinase	522	up
ORF_2719	D-Ala-teichoic acid biosynthesis protein (putative)	150	up
ORF_2720	D-alanine--D-alanyl carrier protein ligase	1527	up
ORF_2721	D-alanyl transfer protein DltB	1215	up
ORF_2722	D-alanine--poly(phosphoribitol) ligase subunit 2	237	up
ORF_2723	D-alanyl transfer protein DltD	1278	up
ORF_2736	histidyl-tRNA synthetase	1281	up
ORF_2737	aspartyl-tRNA synthetase	1797	up
ORF_2738	protein-methionine-S-oxide reductase	531	up
ORF_2743	conserved hypothetical protein	819	up
ORF_2745	conserved hypothetical protein	444	up
ORF_2751	glycyl-tRNA synthetase subunit alpha	900	up
ORF_2752	glycine-tRNA ligase, beta chain	2085	up
ORF_2809	6-phosphofructokinase	963	up
ORF_2810	pyruvate kinase	1761	up
ORF_2825	DNA-binding protein II	276	up
ORF_2846	conserved hypothetical protein	1149	up
ORF_2852	tRNA:M(5)U-54 methyltransferase	1326	up
ORF_2861	putative manganese-dependent inorganic pyrophosphatase	930	up
ORF_2871	protease synthase and sporulation negative regulatory protein pai 1	528	up
ORF_2872	ribitolphosphotransferase	1896	up
ORF_2917	conserved hypothetical protein	141	up
ORF_2918	ABC transporter, ATP-binding protein	678	up
ORF_2919	transport protein	753	up
ORF_2920	microcin immunity protein	969	up
ORF_2921	lysin	1344	up
ORF_2922	GNAT family acetyltransferase	489	up
ORF_2923	MccC family protein	1080	up
ORF_2926	lipase/esterase (putative)	753	up
ORF_2929	methylase (putative)	342	up
ORF_2931	Holliday junction-specific endonuclease	624	up
ORF_2932	penicillin binding protein 1A	2304	up
ORF_2935	ABC transporter, permease protein	1686	up
ORF_2936	hypothetical protein	114	up
ORF_2937	conserved hypothetical protein	501	up
ORF_2938	amino acid ABC transporter, substrate binding protein	858	up
ORF_2939	amino acid ABC transporter, permease protein	672	up
ORF_2940	amino acid ABC transporter, ATP-binding protein	1068	up
ORF_2945	DNA-directed DNA polymerase III epsilon subunit	2805	up
ORF_2946	mevalonate kinase	939	up
ORF_2947	diphosphomevalonate decarboxylase	978	up
ORF_2948	phosphomevalonate kinase	1116	up
ORF_2949	isopentenyl pyrophosphate isomerase	1047	up
ORF_2950	aldose 1-epimerase	1014	up
ORF_2951	maltose phosphorylase	2247	up
ORF_2952	sugar transport protein (putative)	1347	up
ORF_2957	amino acid transport protein	1500	up
ORF_2958	4-aminobutyrate aminotransferase	1350	up
ORF_2964	diaminopimelate decarboxylase	1326	up
ORF_2965	4-oxalocrotonate tautomerase	195	up
ORF_2971	integral membrane protein	267	up
ORF_2972	conserved hypothetical protein	120	up
ORF_2973	integral membrane protein	249	up
ORF_2974	conserved hypothetical protein	897	up
ORF_2975	integral membrane protein	366	up
ORF_2992	integral membrane protein	726	up
ORF_2993	phosphopantetheinyltransferase	552	up
ORF_2994	enoyl-(acyl carrier protein) reductase	759	up
ORF_2995	acetyl-CoA carboxylase, carboxyl transferase subunit alpha	771	up
ORF_2996	acetyl-CoA carboxylase, carboxyl transferase subunit beta	843	up
ORF_2997	acetyl-CoA carboxylase, biotin carboxylase subunit	1389	up
ORF_2998	(3R)-hydroxymyristoyl-(acyl carrier protein) dehydratase	414	up
ORF_2999	acetyl-CoA carboxylase, biotin carboxyl carrier protein	462	up
ORF_3000	3-oxoacyl-(acyl-carrier protein) synthase II	1233	up
ORF_3001	3-oxoacyl-	723	up
ORF_3002	(acyl-carrier protein) S-malonyltransferase	933	up
ORF_3003	acyl carrier protein	249	up
ORF_3004	3-oxoacyl-(acyl carrier protein) synthase III	987	up
ORF_3005	(3R)-hydroxymyristoyl-[acyl carrier protein] dehydratase	444	up
ORF_3021	anthranilate synthase, component I	1437	up
ORF_3022	conserved hypothetical protein	150	up
ORF_3023	ABC superfamily ATP binding cassette transporter, membrane protein	1596	up
ORF_3024	ABC transporter, ATP-binding protein	765	up
ORF_3029	50S ribosomal protein L19	357	up
ORF_3032	conserved hypothetical protein	258	up
ORF_3033	30S ribosomal protein S16	273	up
ORF_3044	ribosomal protein L28	186	up
ORF_3077	conserved hypothetical protein	156	up
ORF_3088	conserved hypothetical protein	177	up
ORF_3096	integral membrane protein	2646	up
ORF_3097	conserved hypothetical protein	303	up
ORF_3098	conserved hypothetical protein	456	up
ORF_3099	integral membrane protein	723	up
ORF_3112	exonuclease SbcC	3186	up
ORF_3113	prenyltransferase	969	up
ORF_3120	muramidase (putative)	2583	up
ORF_3123	glycerol uptake facilitator protein	753	up
ORF_3124	thioredoxin	321	up
ORF_3125	conserved hypothetical protein	270	up
ORF_3132	transposase IS66	282	up
ORF_3133	transport protein	1221	up
ORF_0001	transporter, major facilitator family protein	1392	down
ORF_0002	conserved hypothetical protein	273	down
ORF_0003	conserved hypothetical protein	231	down
ORF_0004	prophage Lp3 protein 24	207	down
ORF_0010	cell surface protein precursor	2355	down
ORF_0011	transcription regulator	441	down
ORF_0012	polysaccharide biosynthesis protein	1422	down
ORF_0016	conserved hypothetical protein	213	down
ORF_0017	conserved hypothetical protein	195	down
ORF_0018	conserved hypothetical protein	549	down
ORF_0020	recombination regulator RecX	804	down
ORF_0025	serine-type D-Ala-D-Ala carboxypeptidase	1683	down
ORF_0026	hypothetical protein	174	down
ORF_0027	conserved hypothetical protein	561	down
ORF_0038	extracellular protein	1449	down
ORF_0050	integrase/recombinase, fragment (putative)	561	down
ORF_0051	ATP-dependent Clp protease ATP-binding subunit ClpC	2220	down
ORF_0061	sulfatase	2106	down
ORF_0062	hypothetical protein	123	down
ORF_0070	Protein of hypothetical function DUF1706	510	down
ORF_0072	permease	1836	down
ORF_0076	conserved hypothetical protein	126	down
ORF_0077	signal peptidase I	588	down
ORF_0078	extracellular protein	1539	down
ORF_0079	cell surface protein precursor	342	down
ORF_0080	cell surface protein precursor	1026	down
ORF_0081	extracellular protein	738	down
ORF_0089	chromosomal replication initiation protein DnaA	1368	down
ORF_0091	conserved hypothetical protein	201	down
ORF_0106	1,4-alpha-glucan branching enzyme	1905	down
ORF_0107	glucose-1-phosphate adenylyltransferase	1140	down
ORF_0108	glucose-1-phosphate adenylyltransferase, subunit	1173	down
ORF_0109	starch (glycogen) synthase	1440	down
ORF_0110	glycogen phosphorylase	2397	down
ORF_0112	HAD superfamily hydrolase	768	down
ORF_0119	histidine protein kinase; sensor protein	1875	down
ORF_0120	YycH-like protein	1326	down
ORF_0121	conserved hypothetical protein	855	down
ORF_0122	hydrolase	816	down
ORF_0123	serine protease HtrA	1263	down
ORF_0124	SPOUT methyltransferase superfamily protein	480	down
ORF_0130	fibronectin-binding protein	648	down
ORF_0132	cation transport protein	1416	down
ORF_0136	short-chain dehydrogenase/oxidoreductase	861	down
ORF_0137	acetoacetate decarboxylase (putative)	846	down
ORF_0138	nitroreductase	654	down
ORF_0158	conserved hypothetical protein	156	down
ORF_0163	conserved hypothetical protein	1194	down
ORF_0164	conserved hypothetical protein	1338	down
ORF_0165	conserved hypothetical protein	300	down
ORF_0167	conserved hypothetical protein	279	down
ORF_0168	extracellular protein	573	down
ORF_0169	extracellular protein	693	down
ORF_0170	cell surface protein precursor	1014	down
ORF_0171	extracellular protein	2151	down
ORF_0181	negative regulator of proteolysis	405	down
ORF_0183	conserved hypothetical protein	324	down
ORF_0184	A/G-specific adenine glycosylase (putative)	1101	down
ORF_0185	conserved hypothetical protein	366	down
ORF_0186	conserved hypothetical protein	507	down
ORF_0187	small heat shock protein	444	down
ORF_0188	conserved hypothetical protein	339	down
ORF_0189	conserved hypothetical protein	144	down
ORF_0190	oxidoreductase (putative)	639	down
ORF_0191	acetyltransferase	459	down
ORF_0192	transport protein	918	down
ORF_0197	hypothetical protein	126	down
ORF_0199	conserved hypothetical protein	273	down
ORF_0204	conserved hypothetical protein	387	down
ORF_0205	purine-cytosine transport protein	1374	down
ORF_0209	exopolysaccharide biosynthesis protein	771	down
ORF_0210	integral membrane protein	507	down
ORF_0215	co-chaperonin GroES	285	down
ORF_0218	undecaprenyl-phosphate N-acetyl-glucosaminyl transferase	1098	down
ORF_0219	conserved hypothetical protein	129	down
ORF_0236	conserved hypothetical protein	843	down
ORF_0237	conserved hypothetical protein	336	down
ORF_0238	conserved hypothetical protein	318	down
ORF_0241	putative frv operon regulatory protein	1113	down
ORF_0249	transcription regulator	732	down
ORF_0250	acetylesterase	792	down
ORF_0254	conserved hypothetical protein	852	down
ORF_0255	short-chain dehydrogenase/oxidoreductase	840	down
ORF_0264	FMN-binding protein	369	down
ORF_0280	alpha-L-rhamnosidase (putative)	1578	down
ORF_0281	sugar transport protein	1281	down
ORF_0282	RhaB1	1953	down
ORF_0289	ferrichrome ABC transporter, substrate binding lipo protein	930	down
ORF_0295	short-chain dehydrogenase/oxidoreductase	747	down
ORF_0296	conserved hypothetical protein	456	down
ORF_0300	cell surface protein precursor	1062	down
ORF_0301	extracellular protein	546	down
ORF_0302	cell surface protein (putative)	2253	down
ORF_0303	hypothetical protein	114	down
ORF_0304	transcription regulator	663	down
ORF_0305	GTP-binding protein LepA	1788	down
ORF_0307	Na(+)/H(+) antiporter	1602	down
ORF_0312	GY family cell surface protein	3570	down
ORF_0314	conserved hypothetical protein	219	down
ORF_0330	conserved hypothetical protein	261	down
ORF_0383	integral membrane protein	564	down
ORF_0384	transcriptional regulator	315	down
ORF_0385	integral membrane protein	681	down
ORF_0386	conserved hypothetical protein	273	down
ORF_0389	transcription regulator	672	down
ORF_0390	conserved hypothetical protein	123	down
ORF_0393	conserved hypothetical protein	219	down
ORF_0400	extracellular protein	783	down
ORF_0401	cell surface protein precursor	1044	down
ORF_0402	cell surface protein precursor (putative)	378	down
ORF_0403	extracellular protein	1509	down
ORF_0404	ABC superfamily ATP binding cassette transporter	966	down
ORF_0405	ABC transporter, permease protein	1002	down
ORF_0406	ABC transporter, ATP-binding protein	687	down
ORF_0412	transcription regulator (putative)	303	down
ORF_0414	metal-dependent hydrolase	924	down
ORF_0416	transport protein	906	down
ORF_0418	conserved hypothetical protein	1410	down
ORF_0420	esterase (putative)	741	down
ORF_0421	conserved hypothetical protein	258	down
ORF_0422	hydrolase	150	down
ORF_0425	3-octaprenyl-4-hydroxybenzoate carboxy-lyase	1473	down
ORF_0426	transport protein	1380	down
ORF_0428	melibiose operon regulatory protein	162	down
ORF_0430	conserved hypothetical protein	195	down
ORF_0431	transcription regulator	1005	down
ORF_0439	PTS, EIIA	534	down
ORF_0440	conserved hypothetical protein	243	down
ORF_0443	lipase/esterase (putative)	831	down
ORF_0449	integral membrane protein	1926	down
ORF_0450	HAD superfamily hydrolase	795	down
ORF_0454	acetyltransferase (putative)	528	down
ORF_0457	transcription regulator	330	down
ORF_0464	oxidoreductase	1029	down
ORF_0465	conserved hypothetical protein	867	down
ORF_0466	possible cystathionine beta-lyase	1191	down
ORF_0467	conserved hypothetical protein	594	down
ORF_0473	conserved hypothetical protein	222	down
ORF_0475	alcohol dehydrogenase	1041	down
ORF_0476	oxidoreductase (putative)	597	down
ORF_0478	conserved hypothetical protein	372	down
ORF_0482	GNAT family acetyltransferase	498	down
ORF_0485	signal peptidase I	618	down
ORF_0486	galactoside O-acetyltransferase	621	down
ORF_0487	DNA-(apurinic or apyrimidinic site) lyase	651	down
ORF_0492	transcription regulator	435	down
ORF_0493	conserved hypothetical protein	399	down
ORF_0494	carboxymuconolactone decarboxylase	321	down
ORF_0495	short-chain dehydrogenase/oxidoreductase	744	down
ORF_0505	transport protein	1206	down
ORF_0506	transcription regulator (putative)	363	down
ORF_0508	extracellular protein (putative)	825	down
ORF_0509	cell surface protein	2790	down
ORF_0510	cell surface protein precursor	372	down
ORF_0511	extracellular protein	609	down
ORF_0512	cell surface protein precursor	1044	down
ORF_0516	extracellular protein	705	down
ORF_0517	cell surface protein precursor	1065	down
ORF_0518	cell surface protein precursor	426	down
ORF_0519	extracellular protein	1395	down
ORF_0520	sensor histidine protein kinase	1329	down
ORF_0521	conserved hypothetical protein	255	down
ORF_0522	4-hydroxybenzoyl-CoA thioesterase domain protein	135	down
ORF_0531	amino acid transport protein	1485	down
ORF_0532	conserved hypothetical protein	822	down
ORF_0533	conserved hypothetical protein	426	down
ORF_0534	conserved hypothetical protein	138	down
ORF_0537	extracellular zinc metalloproteinase	1128	down
ORF_0541	oxidoreductase (putative)	657	down
ORF_0549	conserved hypothetical protein	420	down
ORF_0550	transcription regulator	912	down
ORF_0562	dehydrogenase	1059	down
ORF_0566	cellobiose PTS, EIIA	447	down
ORF_0569	conserved hypothetical protein	315	down
ORF_0571	integral membrane protein	363	down
ORF_0572	cell surface protein precursor (putative)	3225	down
ORF_0574	rep protein	954	down
ORF_0575	conserved hypothetical protein	219	down
ORF_0581	GPH family glycoside-pentoside-hexuronide:cation symporter	1401	down
ORF_0582	lipase/esterase	1017	down
ORF_0584	alpha-ribazole-5'-phosphate phosphatase	669	down
ORF_0589	integral membrane protein	765	down
ORF_0590	transcription regulator	327	down
ORF_0602	fumarate reductase, flavoprotein subunit precursor	1866	down
ORF_0607	conserved hypothetical protein	123	down
ORF_0608	GY family cell surface protein	3783	down
ORF_0609	conserved hypothetical protein	531	down
ORF_0613	hypothetical protein	132	down
ORF_0614	conserved hypothetical protein	573	down
ORF_0615	conserved hypothetical protein	333	down
ORF_0616	lipoprotein	1011	down
ORF_0617	fumarylacetoacetate hydrolase	801	down
ORF_0618	hypothetical protein	117	down
ORF_0625	conserved hypothetical protein	384	down
ORF_0626	cell surface protein	2505	down
ORF_0627	MFS family major facilitator transporter	1110	down
ORF_0628	transcriptional regulator	345	down
ORF_0630	transcription regulator	369	down
ORF_0631	integral membrane protein	369	down
ORF_0632	hypothetical protein	117	down
ORF_0633	conserved hypothetical protein	1404	down
ORF_0634	possible transposase	180	down
ORF_0636	conserved hypothetical protein	258	down
ORF_0637	transposase	300	down
ORF_0638	conserved hypothetical protein	204	down
ORF_0644	enoyl-	930	down
ORF_0645	DNA helicase (putative)	2307	down
ORF_0647	7,8-dihydro-8-oxoguanine-triphosphatase (putative)	954	down
ORF_0651	GroEL supressor protein SugE	315	down
ORF_0652	MutT/nudix family protein	438	down
ORF_0657	transcription regulator	453	down
ORF_0658	integral membrane protein	879	down
ORF_0671	conserved hypothetical protein	252	down
ORF_0674	phosphoglycolate phosphatase (putative)	627	down
ORF_0675	conserved hypothetical protein	819	down
ORF_0676	extracellular protein	510	down
ORF_0677	metal uptake regulator	444	down
ORF_0679	conserved hypothetical protein	150	down
ORF_0681	pyridoxal kinase	819	down
ORF_0682	conserved hypothetical protein	474	down
ORF_0690	putative pyruvate oxidase	1761	down
ORF_0693	transport protein	1308	down
ORF_0695	transcription regulator	486	down
ORF_0703	negative regulator of proteolysis	423	down
ORF_0704	conserved hypothetical protein	783	down
ORF_0721	conserved hypothetical protein	792	down
ORF_0722	conserved hypothetical protein	432	down
ORF_0723	glycerol uptake facilitator protein	717	down
ORF_0726	hydroxyethylthiazole kinase	792	down
ORF_0727	phosphomethylpyrimidine kinase	825	down
ORF_0728	thiamine-phosphate diphosphorylase	654	down
ORF_0729	purine-cytosine transport protein	1200	down
ORF_0730	conserved hypothetical protein	741	down
ORF_0740	transcription regulator (putative)	474	down
ORF_0741	small heat shock protein	423	down
ORF_0742	integral membrane protein	171	down
ORF_0743	integral membrane protein	201	down
ORF_0744	conserved hypothetical protein	444	down
ORF_0745	transport protein	1233	down
ORF_0748	oxidoreductase	849	down
ORF_0749	oxidoreductase	873	down
ORF_0752	extracellular protein	813	down
ORF_0764	short-chain dehydrogenase/oxidoreductase	795	down
ORF_0787	integral membrane protein	273	down
ORF_0798	P-type cation-transporting ATPase	2613	down
ORF_0801	2,5-diketo-D-gluconate reductase	861	down
ORF_0810	extracellular protein	3408	down
ORF_0811	cell surface protein precursor	1035	down
ORF_0812	extracellular protein	810	down
ORF_0820	conserved hypothetical protein	336	down
ORF_0822	conserved hypothetical protein	594	down
ORF_0823	conserved hypothetical protein	312	down
ORF_0838	DegV family protein	897	down
ORF_0840	PTS family N-acetylglucosamine porter, IIABC component	1989	down
ORF_0841	conserved hypothetical protein	342	down
ORF_0844	ABC transporter, ATP-binding protein	1554	down
ORF_0853	conserved hypothetical protein	744	down
ORF_0854	transport protein	1188	down
ORF_0855	conserved hypothetical protein	318	down
ORF_0856	integral membrane protein	561	down
ORF_0865	conserved hypothetical protein	192	down
ORF_0866	ABC transporter, ATP-binding and permease protein	399	down
ORF_0867	ABC transporter, ATP-binding and permease protein	1605	down
ORF_0868	poly(glycerol-phosphate) alpha-glucosyltransferase	1578	down
ORF_0869	ABC transporter, ATP-binding and permease protein	1764	down
ORF_0870	conserved hypothetical protein	132	down
ORF_0871	conserved hypothetical protein	144	down
ORF_0872	hypothetical protein	168	down
ORF_0873	conserved hypothetical protein	510	down
ORF_0874	mobilization protein	1086	down
ORF_0875	replication protein 141	711	down
ORF_0883	cell surface protein precursor	1713	down
ORF_0885	transposase	690	down
ORF_0906	hypothetical protein	183	down
ORF_0907	hypothetical protein	198	down
ORF_0908	hypothetical protein	132	down
ORF_0909	conserved hypothetical protein	159	down
ORF_0920	D-alanyl-D-alanine dipeptidase	558	down
ORF_0921	multidrug transport protein	1197	down
ORF_0923	excinuclease ABC subunit B	2004	down
ORF_0935	RNA polymerase factor sigma-54	1338	down
ORF_0947	cell surface protein	7947	down
ORF_0954	ATP/GTP hydrolase	462	down
ORF_0955	acetyltransferase (putative)	516	down
ORF_0956	DNA-directed DNA polymerase III epsilon subunit	537	down
ORF_0957	exodeoxyribonuclease III	798	down
ORF_0958	oxidoreductase (putative)	903	down
ORF_0962	integral membrane protein	666	down
ORF_0966	conserved hypothetical protein	132	down
ORF_0973	conserved hypothetical protein	426	down
ORF_0974	nitro/flavin reductase	753	down
ORF_0978	RNA binding protein	402	down
ORF_0988	acetate kinase	1194	down
ORF_0989	adenine-specific methyltransferase	1095	down
ORF_0990	conserved hypothetical protein	165	down
ORF_0991	conserved hypothetical protein	489	down
ORF_0992	sensory box protein/response regulator	186	down
ORF_0993	conserved hypothetical protein	471	down
ORF_0995	ComG operon protein 2	969	down
ORF_0996	ComG operon protein 1	975	down
ORF_0997	ribokinase	921	down
ORF_1002	conserved hypothetical protein	165	down
ORF_1004	transcription regulator	462	down
ORF_1007	mechanosensitive transport protein	894	down
ORF_1008	amino acid amidohydrolase	1155	down
ORF_1009	2,3,4,5-tetrahydropyridine-2-carboxylate N-succinyltransferase	711	down
ORF_1010	conserved hypothetical protein	492	down
ORF_1011	phosphoesterase (putative)	519	down
ORF_1012	xanthosine triphosphate pyrophosphatase	609	down
ORF_1013	glutamate racemase	822	down
ORF_1014	conserved hypothetical protein	684	down
ORF_1015	thioredoxin	312	down
ORF_1017	conserved hypothetical protein	258	down
ORF_1018	conserved hypothetical protein	297	down
ORF_1019	Holliday junction resolvase-like protein	435	down
ORF_1020	conserved hypothetical protein	270	down
ORF_1024	DNA-directed DNA polymerase IV	1134	down
ORF_1035	ATP-dependent Clp protease, ATP-binding subunit ClpL	1626	down
ORF_1039	negative regulator of proteolysis	381	down
ORF_1045	oxidoreductase	1206	down
ORF_1049	conserved hypothetical protein	732	down
ORF_1050	Na(+)/H(+) antiporter	1197	down
ORF_1051	transport protein	1509	down
ORF_1052	lipase/esterase (putative)	837	down
ORF_1053	lipase/esterase (putative)	837	down
ORF_1054	conserved hypothetical protein	408	down
ORF_1057	arabinose transport protein	1401	down
ORF_1061	maltose O-acetyltransferase	561	down
ORF_1062	conserved hypothetical protein	399	down
ORF_1077	HAD superfamily hydrolase	819	down
ORF_1078	choloylglycine hydrolase	975	down
ORF_1082	maltose phosphorylase	2205	down
ORF_1092	putative fructose-like phosphotransferase system subunit EIIA	444	down
ORF_1093	putative PTS transporter components IIBC	1458	down
ORF_1094	cystathionine beta-lyase	1164	down
ORF_1101	HIT family protein	525	down
ORF_1102	conserved hypothetical protein	246	down
ORF_1104	conserved hypothetical protein	642	down
ORF_1105	ABC transporter, ATP-binding protein	423	down
ORF_1114	integral membrane protein	366	down
ORF_1117	transcription regulator	423	down
ORF_1118	NADH dehydrogenase	1203	down
ORF_1119	integral membrane protein	270	down
ORF_1120	conserved hypothetical protein	411	down
ORF_1121	conserved hypothetical protein	429	down
ORF_1128	acetyltransferase (putative)	486	down
ORF_1129	acetyltransferase (putative)	528	down
ORF_1130	conserved hypothetical protein	186	down
ORF_1134	acetaldehyde dehydrogenase	1368	down
ORF_1141	conserved hypothetical protein	246	down
ORF_1142	integral membrane protein	564	down
ORF_1143	biotin-(acetyl-CoA-carboxylase)ligase and biotin operon repressor	972	down
ORF_1144	conserved hypothetical protein	123	down
ORF_1149	integral membrane protein	273	down
ORF_1150	transcription regulator	543	down
ORF_1151	transport protein	1446	down
ORF_1155	extracellular zinc metalloproteinase	564	down
ORF_1157	cell division protein SufI	1506	down
ORF_1162	conserved hypothetical protein	456	down
ORF_1163	acetyl-CoA carboxylase, biotin carboxyl carrier protein	573	down
ORF_1166	transport protein	1188	down
ORF_1168	multidrug transport protein	1485	down
ORF_1169	conserved hypothetical protein	501	down
ORF_1194	metallo-beta-lactamase	744	down
ORF_1199	conserved hypothetical protein	636	down
ORF_1200	GTP pyrophosphokinase (putative)	663	down
ORF_1237	diaminopimelate epimerase	999	down
ORF_1238	NUDIX family hydrolase	555	down
ORF_1239	conserved hypothetical protein	252	down
ORF_1240	methylthioadenosine nucleosidase; S-adenosylhomocysteine nucleosidase	693	down
ORF_1241	cysteine desulfurase	1161	down
ORF_1242	conserved hypothetical protein	342	down
ORF_1246	extracellular protein	732	down
ORF_1247	cell surface protein	1035	down
ORF_1248	extracellular protein	1449	down
ORF_1249	phosphoglycerate mutase	666	down
ORF_1250	conserved hypothetical protein	675	down
ORF_1251	exodeoxyribonuclease V alpha subunit	2550	down
ORF_1254	conserved hypothetical protein	204	down
ORF_1255	transcription regulator	960	down
ORF_1258	conserved hypothetical protein	507	down
ORF_1269	adenine phosphoribosyltransferase	543	down
ORF_1270	integral membrane protein	1074	down
ORF_1271	conserved hypothetical protein	522	down
ORF_1278	glycosyltransferase	1500	down
ORF_1282	hypothetical protein	114	down
ORF_1283	hypothetical protein	1287	down
ORF_1284	hypothetical protein	405	down
ORF_1285	conserved hypothetical protein	888	down
ORF_1286	conserved hypothetical protein	675	down
ORF_1287	poly(glycerol-phosphate) alpha-glucosyltransferase	1509	down
ORF_1288	poly(glycerol-phosphate) alpha-glucosyltransferase	1527	down
ORF_1289	conserved hypothetical protein	198	down
ORF_1290	methyltransferase (putative)	528	down
ORF_1291	phosphatase (putative)	651	down
ORF_1297	possible universal stress protein	507	down
ORF_1300	sugar ABC superfamily ATP binding cassette transporter, membrane protein	843	down
ORF_1311	protein-methionine-S-oxide reductase	804	down
ORF_1312	conserved hypothetical protein	117	down
ORF_1313	transcription regulator	393	down
ORF_1314	conserved hypothetical protein	642	down
ORF_1315	transport protein	939	down
ORF_1318	histidine protein kinase; sensor protein	1263	down
ORF_1319	response regulator	768	down
ORF_1321	integral membrane protein	372	down
ORF_1322	CAAX family protease	687	down
ORF_1324	conserved hypothetical protein	513	down
ORF_1334	conserved hypothetical protein	1638	down
ORF_1335	sulfate adenylyltransferase	1176	down
ORF_1336	adenylylsulfate kinase	624	down
ORF_1337	exopolyphosphatase-related protein (putative)	957	down
ORF_1338	hypothetical protein	120	down
ORF_1339	arylsulfate sulfotransferase	1740	down
ORF_1340	conserved hypothetical protein	126	down
ORF_1341	sodium/sulfate symport protein (putative)	1776	down
ORF_1342	cation efflux protein (putative)	1392	down
ORF_1343	conserved hypothetical protein	246	down
ORF_1344	GNAT family acetyltransferase	447	down
ORF_1346	conserved hypothetical protein	477	down
ORF_1347	hypothetical protein	114	down
ORF_1349	conserved hypothetical protein	657	down
ORF_1350	transcription regulator levR	2556	down
ORF_1352	beta-glucosides PTS, EIIA	339	down
ORF_1353	beta-glucosides PTS, EIIB	300	down
ORF_1369	conserved hypothetical protein	981	down
ORF_1370	conserved hypothetical protein	1170	down
ORF_1371	nisin resistance protein (putative)	870	down
ORF_1372	transcription regulator	948	down
ORF_1373	conserved hypothetical protein	162	down
ORF_1378	histidine protein kinase; sensor protein	1368	down
ORF_1379	response regulator	693	down
ORF_1380	conserved hypothetical protein	141	down
ORF_1381	membrane-associated phospholipid phosphatase	666	down
ORF_1383	DedA protein (DSG-1 protein)	636	down
ORF_1384	glycosyltransferase	996	down
ORF_1385	integral membrane protein	2037	down
ORF_1386	MutT/NudX family protein (putative)	414	down
ORF_1396	NADH peroxidase	1317	down
ORF_1408	conserved hypothetical protein	786	down
ORF_1409	tRNA (guanine-N(7)-)-methyltransferase	699	down
ORF_1424	integral membrane protein	717	down
ORF_1435	conserved hypothetical protein	312	down
ORF_1442	HAD superfamily hydrolase	531	down
ORF_1443	ribosome biogenesis GTPase YqeH	1137	down
ORF_1444	conserved hypothetical protein	315	down
ORF_1445	nicotinate-nucleotide adenylyltransferase	636	down
ORF_1446	conserved hypothetical protein	618	down
ORF_1447	conserved hypothetical protein	357	down
ORF_1448	methyltransferase (putative)	735	down
ORF_1449	conserved hypothetical protein	1152	down
ORF_1455	replication-associated recombination protein A	1350	down
ORF_1467	conserved hypothetical protein	282	down
ORF_1468	conserved hypothetical protein	213	down
ORF_1469	nicking enzyme (TraA)-like	2064	down
ORF_1484	hypothetical protein	213	down
ORF_1485	conserved hypothetical protein	348	down
ORF_1486	conserved hypothetical protein	264	down
ORF_1499	transcription regulator	204	down
ORF_1500	glucosamine-6-phosphate isomerase	714	down
ORF_1508	conserved hypothetical protein	555	down
ORF_1511	conserved hypothetical protein	1347	down
ORF_1512	NADPH-dependent FMN reductase	672	down
ORF_1514	cellobiose PTS, EIIC	1278	down
ORF_1515	conserved hypothetical protein	267	down
ORF_1516	conserved hypothetical protein	1095	down
ORF_1517	dihydroorotase	1119	down
ORF_1526	conserved hypothetical protein	279	down
ORF_1527	integral membrane protein	288	down
ORF_1531	beta-glucosides PTS, EIIABC	1968	down
ORF_1532	conserved hypothetical protein	783	down
ORF_1538	conserved hypothetical protein	648	down
ORF_1539	extracellular protein	306	down
ORF_1540	conserved hypothetical protein	252	down
ORF_1542	transcription regulator	393	down
ORF_1548	conserved hypothetical protein	312	down
ORF_1549	conserved hypothetical protein	255	down
ORF_1551	oxidoreductase	1395	down
ORF_1552	conserved hypothetical protein	288	down
ORF_1553	GTP pyrophosphokinase (putative)	693	down
ORF_1558	ABC superfamily ATP binding cassette transporter, membrane protein	1479	down
ORF_1559	conserved hypothetical protein	366	down
ORF_1560	conserved hypothetical protein	213	down
ORF_1566	conserved hypothetical protein	303	down
ORF_1567	probable methyltransferase	564	down
ORF_1568	pantetheine-phosphate adenylyltransferase	492	down
ORF_1569	endopeptidase La (putative)	1047	down
ORF_1570	ComE operon protein 1	726	down
ORF_1576	multidrug transport protein	1203	down
ORF_1585	conserved hypothetical protein	408	down
ORF_1589	excinuclease ABC subunit C	1752	down
ORF_1590	exopolysaccharide biosynthesis protein	759	down
ORF_1591	capsular exopolysaccharide family protein	681	down
ORF_1592	exopolysaccharide biosynthesis protein	795	down
ORF_1593	UDP-glucose 4-epimerase	939	down
ORF_1594	priming glycosyltransferase	672	down
ORF_1595	glycosyltransferase	717	down
ORF_1596	polysaccharide polymerase	1275	down
ORF_1597	glycosyltransferase	969	down
ORF_1598	repeat unit transporter	1452	down
ORF_1615	conserved hypothetical protein	207	down
ORF_1622	transport protein	678	down
ORF_1623	transcription regulator of multidrug-efflux transporter	816	down
ORF_1625	integral membrane protein	504	down
ORF_1631	Na(+)/H(+) antiporter	1167	down
ORF_1635	cell surface protein precursor	2379	down
ORF_1644	Aryl-alcohol dehydrogenase family enzyme	993	down
ORF_1648	exopolysaccharide biosynthesis protein; chain length determinator Wzz	579	down
ORF_1649	exopolysaccharide biosynthesis protein	774	down
ORF_1650	UDP-glucose 4-epimerase	948	down
ORF_1651	priming glycosyltransferase	678	down
ORF_1652	glycosyl transferase group 2	765	down
ORF_1653	glycosyltransferase	1023	down
ORF_1654	conserved hypothetical protein	1206	down
ORF_1660	glycosyltransferase	909	down
ORF_1661	glycosyltransferase	933	down
ORF_1662	UDP-galactopyranose mutase	1134	down
ORF_1663	polysaccharide biosynthesis protein	1134	down
ORF_1664	polysaccharide biosynthesis protein (putative)	624	down
ORF_1665	polysaccharide polymerase	1218	down
ORF_1666	polysaccharide biosynthesis protein (putative)	1110	down
ORF_1667	O-acetyltransferase	1080	down
ORF_1669	conserved hypothetical protein	747	down
ORF_1677	CDP-diacylglycerol--glycerol-3-phosphate 3-phosphatidyltransferase	585	down
ORF_1681	conserved hypothetical protein	126	down
ORF_1687	septum site-determining protein MinC	669	down
ORF_1688	cell shape determining protein MreD	519	down
ORF_1689	cell shape determining protein MreC	846	down
ORF_1695	glutamate-cysteine ligase (putative)	1239	down
ORF_1697	cysteine desulfurase	1155	down
ORF_1706	bifunctional glutamate--cysteine ligase/glutathione synthetase	2256	down
ORF_1711	conserved hypothetical protein	876	down
ORF_1714	oxidoreductase	1029	down
ORF_1735	uracil transport protein	1281	down
ORF_1738	glycine hydroxymethyltransferase	1239	down
ORF_1739	SUA5 family translation factor	1020	down
ORF_1740	protoporphyrinogen oxidase (putative)	867	down
ORF_1741	peptide chain release factor 1	1083	down
ORF_1742	thymidine kinase	588	down
ORF_1753	conserved hypothetical protein	393	down
ORF_1755	prophage Lp2 protein 58	384	down
ORF_1756	prophage Lp1 protein 59	297	down
ORF_1757	prophage Lp1 protein 58, lysin	1167	down
ORF_1758	conserved hypothetical protein	123	down
ORF_1759	conserved hypothetical protein	450	down
ORF_1761	prophage protein	363	down
ORF_1762	probable minor tail protein	5832	down
ORF_1763	prophage protein	204	down
ORF_1764	prophage protein	399	down
ORF_1765	prophage major tail protein	471	down
ORF_1766	prophage protein	366	down
ORF_1767	prophage protein	552	down
ORF_1768	prophage protein	348	down
ORF_1769	conserved hypothetical protein	333	down
ORF_1770	conjugal transfer protein	177	down
ORF_1771	prophage major head protein	1023	down
ORF_1772	prophage protein	348	down
ORF_1773	possible scaffold protein	678	down
ORF_1774	conserved hypothetical protein	207	down
ORF_1775	conserved hypothetical protein	201	down
ORF_1776	prophage minor head protein	1686	down
ORF_1777	protein of hypothetical function DUF464	258	down
ORF_1778	SPP1 family phage portal protein	1509	down
ORF_1779	PBSX family phage terminase	1239	down
ORF_1780	prophage Lp2 protein 34	528	down
ORF_1781	conserved hypothetical protein	270	down
ORF_1782	hypothetical protein	198	down
ORF_1783	prophage Lp1 protein 33	462	down
ORF_1784	prophage Lp2 protein 23	519	down
ORF_1785	prophage Lp2 protein 21	288	down
ORF_1786	DnaD domain protein	933	down
ORF_1788	phage protein	531	down
ORF_1790	prophage Lp2 protein 13	258	down
ORF_1792	putative uncharacterized protein	135	down
ORF_1806	Lactate dehydrogenase-like 2-hydroxyacid dehydrogenase	960	down
ORF_1807	putative LtrC	1125	down
ORF_1808	putative uncharacterized protein	216	down
ORF_1809	DNA topoisomerase	372	down
ORF_1810	DNA integration/recombination/inversion protein	633	down
ORF_1811	YitT family protein	903	down
ORF_1812	hypothetical protein	204	down
ORF_1813	copy number control protein	801	down
ORF_1815	Replication initiator protein	138	down
ORF_1816	DNA-damage-inducible protein	282	down
ORF_1817	conserved hypothetical protein	507	down
ORF_1820	nickase	2061	down
ORF_1821	ATP-dependent Clp protease, ATP-binding subunit ClpL	258	down
ORF_1823	lactate oxidase	1101	down
ORF_1824	pyruvate oxidase	1749	down
ORF_1825	transcription regulator (putative)	426	down
ORF_1827	conserved hypothetical protein	411	down
ORF_1828	sugar specific permease (putative)	690	down
ORF_1829	Rhamnulose-1-phosphate aldolase	852	down
ORF_1830	L-rhamnose isomerase	1284	down
ORF_1831	conserved hypothetical protein	315	down
ORF_1832	rhamnulokinase	1467	down
ORF_1833	MFS family rhamnose tranport protein	1329	down
ORF_1861	ROK family protein	879	down
ORF_1863	conserved hypothetical protein	1290	down
ORF_1867	fructokinase	864	down
ORF_1876	putative uncharacterized protein lp_3645	1851	down
ORF_1880	transcription regulator	1050	down
ORF_1882	PTS family lactose-N,N-diacetylchitobiose-beta-glucoside (lac) porter component IIA	348	down
ORF_1884	cellobiose-specific PTS system IIB component	312	down
ORF_1885	membrane-associated phospholipid phosphatase	948	down
ORF_1902	transposase	309	down
ORF_1903	transposase	465	down
ORF_1906	conserved hypothetical protein	1953	down
ORF_1907	conserved hypothetical protein	1197	down
ORF_1924	thymidylate kinase	666	down
ORF_1925	conserved hypothetical protein	252	down
ORF_1926	recombination protein RecR	600	down
ORF_1927	conserved hypothetical protein	297	down
ORF_1928	DNA-directed DNA polymerase III, gamma/tau subunit	1698	down
ORF_1942	possible alpha/beta hydrolase	888	down
ORF_1943	transcription antitermination protein NusG	549	down
ORF_1946	DNA-directed RNA polymerase, sigma factor 30	564	down
ORF_1947	conserved hypothetical protein	546	down
ORF_1948	tRNA/rRNA methyltransferase	768	down
ORF_1949	conserved hypothetical protein	411	down
ORF_1950	cysteine-tRNA ligase	1413	down
ORF_1969	mannose PTS, EIIB	519	down
ORF_1970	mannose PTS, EIIA	420	down
ORF_1982	glucose-1-phosphate thymidylyltransferase	870	down
ORF_1983	transporter	1539	down
ORF_1988	serine-type D-Ala-D-Ala carboxypeptidase	1176	down
ORF_1989	conserved hypothetical protein	129	down
ORF_1991	conserved hypothetical protein	564	down
ORF_1992	phosphoribosyl-ATP pyrophosphatase	132	down
ORF_1994	conserved hypothetical protein	201	down
ORF_1997	universal stress protein UspA family nucleotide-binding protein	441	down
ORF_1998	ATP-dependent RNA helicase	1335	down
ORF_1999	oxidoreductase (putative)	1008	down
ORF_2000	hypothetical protein	120	down
ORF_2006	cellobiose PTS, EIIC	1317	down
ORF_2007	E1-E2 family cation-transporting ATPase	2340	down
ORF_2008	transcription regulator (putative)	576	down
ORF_2012	glutamyl-tRNA amidotransferase, subunit A	1464	down
ORF_2015	DNA ligase (NAD+)	2040	down
ORF_2016	ATP-dependent DNA helicase PcrA	2268	down
ORF_2020	mannosyl-glycoprotein endo-beta-N-acetylglucosamidase	642	down
ORF_2028	cytochrome D ubiquinol oxidase, subunit II	996	down
ORF_2029	cytochrome D ubiquinol oxidase, subunit I	1440	down
ORF_2030	cell surface hydrolase	2706	down
ORF_2032	integral membrane protein	582	down
ORF_2065	conserved hypothetical protein	1089	down
ORF_2069	tRNA-pseudouridine synthase I	837	down
ORF_2113	transcription regulator (putative)	603	down
ORF_2114	ATP-dependent Clp protease ATP-binding subunit ClpC	2505	down
ORF_2115	transcriptional regulator CtsR	468	down
ORF_2116	conserved hypothetical protein	129	down
ORF_2118	deoxyguanosine kinase	636	down
ORF_2130	integral membrane protein	750	down
ORF_2134	conserved hypothetical protein	465	down
ORF_2140	conserved hypothetical protein	717	down
ORF_2144	conserved hypothetical protein	126	down
ORF_2146	transcription regulator	1008	down
ORF_2147	heat shock protein HSP33	888	down
ORF_2160	conserved hypothetical protein	126	down
ORF_2179	conserved hypothetical protein	195	down
ORF_2183	conserved hypothetical protein	168	down
ORF_2184	3-hydroxyisobutyrate dehydrogenase	858	down
ORF_2185	integral membrane protein	774	down
ORF_2186	maltose O-acetyltransferase	555	down
ORF_2201	transcription regulator	510	down
ORF_2202	short-chain alcohol dehydrogenase/reductase	825	down
ORF_2203	conserved hypothetical protein	516	down
ORF_2206	conserved hypothetical protein	219	down
ORF_2207	integral membrane protein	777	down
ORF_2214	cell surface hydrolase, membrane-bound (putative)	762	down
ORF_2228	1-deoxy-D-xylulose-5-phosphate synthase	1752	down
ORF_2238	conserved hypothetical protein	357	down
ORF_2239	acetyltransferase	285	down
ORF_2241	possible hydrolase	786	down
ORF_2242	thioredoxin H-type	321	down
ORF_2262	transcription regulator	726	down
ORF_2263	YbaK/ebsC protein	504	down
ORF_2264	integral membrane protein	780	down
ORF_2274	major facilitator superfamily multidrug transporter	1164	down
ORF_2277	integral membrane protein	348	down
ORF_2278	glucose-6-phosphate 1-dehydrogenase	1485	down
ORF_2279	aminotransferase with N	1365	down
ORF_2280	aromatic amino acid specific aminotransferase	1173	down
ORF_2283	permease	366	down
ORF_2284	permease	423	down
ORF_2290	integral membrane protein	963	down
ORF_2294	carbamoyl-phosphate synthase (glutamine-hydrolyzing), large subunit	3177	down
ORF_2295	carbamoyl-phosphate synthase (glutamine-hydrolyzing)	1095	down
ORF_2296	dihydroorotase	1293	down
ORF_2297	aspartate carbamoyltransferase catalytic subunit	936	down
ORF_2298	pyrimidine regulatory protein PyrR	543	down
ORF_2301	conserved hypothetical protein	141	down
ORF_2304	diguanylate cyclase/phosphodiesterase domain-containing protein	654	down
ORF_2305	diguanylate cyclase/phosphodiesterase domain-containing protein	129	down
ORF_2306	conserved hypothetical protein	519	down
ORF_2308	conserved hypothetical protein	669	down
ORF_2309	phosphoribosylamine--glycine ligase	1242	down
ORF_2310	bifunctional purine biosynthesis protein PurH	1533	down
ORF_2311	phosphoribosylglycinamide formyltransferase	579	down
ORF_2312	phosphoribosylaminoimidazole synthetase	1026	down
ORF_2313	amidophosphoribosyltransferase	1455	down
ORF_2314	phosphoribosylformylglycinamidine synthase II	2220	down
ORF_2315	phosphoribosylformylglycinamidine synthase I	681	down
ORF_2316	purine biosynthesis cluster protein	255	down
ORF_2317	phosphoribosylaminoimidazole-succinocarboxamide synthase	732	down
ORF_2318	phosphoribosylaminoimidazole carboxylase ATPase subunit	1131	down
ORF_2319	phosphoribosylaminoimidazole carboxylase, catalytic subunit	486	down
ORF_2333	universal stress protein UspA	537	down
ORF_2334	Na+/H+ ion antiporter	237	down
ORF_2336	conserved hypothetical protein	474	down
ORF_2337	conserved hypothetical protein	327	down
ORF_2358	D-serine ammonia-lyase	1311	down
ORF_2365	phosphoglycerate mutase	675	down
ORF_2366	conserved hypothetical protein	489	down
ORF_2370	phosphoglycerate dehydrogenase	951	down
ORF_2374	cell surface protein precursor	3120	down
ORF_2375	cell surface protein precursor	2937	down
ORF_2378	amino acid transport protein	1437	down
ORF_2379	transcription regulator (putative)	456	down
ORF_2380	oxidoreductase	867	down
ORF_2381	organophosphate reductase	864	down
ORF_2382	transcription regulator	900	down
ORF_2398	serine transporter	1281	down
ORF_2400	conserved hypothetical protein	120	down
ORF_2402	DNA-directed RNA polymerase subunit delta	609	down
ORF_2403	conserved hypothetical protein	441	down
ORF_2404	conserved hypothetical protein	132	down
ORF_2408	conserved hypothetical protein	123	down
ORF_2409	lipoprotein precursor (putative)	987	down
ORF_2410	integral membrane protein	1023	down
ORF_2412	beta-lactamase	825	down
ORF_2421	conserved hypothetical protein	138	down
ORF_2422	4-diphosphocytidyl-2-C-methyl-D-erythritol kinase	867	down
ORF_2429	hypothetical protein	192	down
ORF_2430	conserved hypothetical protein	390	down
ORF_2450	ATP-dependent DNA helicase	2310	down
ORF_2451	integral membrane protein PlnW	687	down
ORF_2452	integral membrane protein plnV	681	down
ORF_2453	integral membrane protein PlnU	669	down
ORF_2456	bacteriocin ABC transporter, accessory factor PlnH	249	down
ORF_2457	PlnH	225	down
ORF_2458	bacteriocin ABC-transporter, ATP-binding and permease protein PlnG	2151	down
ORF_2459	bacteriocin precursor peptide PlnE (putative)	171	down
ORF_2460	membrane-bound protease CAAX family immunity protein PlnI	774	down
ORF_2461	response regulator PlnD, repressor	744	down
ORF_2462	response regulator PlnC, activator	744	down
ORF_2463	histidine protein kinase PlnB, sensor protein	795	down
ORF_2464	plantaricin A precursor peptide, induction factor	147	down
ORF_2465	immunity protein PlnP	747	down
ORF_2466	plantaricin biosynthesis protein PlnO	1200	down
ORF_2467	bacteriocin precursor peptide PlnN (putative)	168	down
ORF_2468	immunity protein PlnM	201	down
ORF_2469	bacteriocin precursor peptide PlnJ (putative)	168	down
ORF_2471	immunity protein PlnL	669	down
ORF_2481	integral membrane protein	264	down
ORF_2482	conserved hypothetical protein	918	down
ORF_2491	ATP-dependent DNA helicase/translocase (putative)	834	down
ORF_2492	late competence protein	444	down
ORF_2499	phosphate ABC superfamily ATP binding cassette transporter, binding protein	876	down
ORF_2500	phosphate ABC transporter, permease protein	930	down
ORF_2501	phosphate ABC transporter, permease protein	885	down
ORF_2502	phosphate ABC transporter, ATP-binding protein	810	down
ORF_2503	phosphate ABC transporter, ATP-binding protein	756	down
ORF_2504	phosphate transport system protein	675	down
ORF_2505	stress-responsive transcription regulator (putative)	312	down
ORF_2506	integral membrane protein	366	down
ORF_2507	HPr kinase/phosphorylase	948	down
ORF_2514	ORF-11	351	down
ORF_2515	ORF-12	285	down
ORF_2523	conserved hypothetical protein	378	down
ORF_2524	possible NADPH:quinone reductase	543	down
ORF_2525	conserved hypothetical protein	156	down
ORF_2527	lysozyme	807	down
ORF_2528	muramidase	453	down
ORF_2529	muramidase	411	down
ORF_2530	conserved hypothetical protein	660	down
ORF_2540	transposase, fragment	213	down
ORF_2541	conserved hypothetical protein	249	down
ORF_2544	xylose operon regulator	450	down
ORF_2545	xylose operon regulator	642	down
ORF_2554	conserved hypothetical protein	129	down
ORF_2555	conserved hypothetical protein	120	down
ORF_2575	conserved hypothetical protein	834	down
ORF_2576	transcription regulator	897	down
ORF_2582	conserved hypothetical protein	576	down
ORF_2596	fructokinase	864	down
ORF_2604	beta-glucosides PTS, EIIABC	1995	down
ORF_2609	conserved hypothetical protein	1257	down
ORF_2614	3',5'-cyclic-nucleotide phosphodiesterase	855	down
ORF_2616	effector of murein hydrolase (putative)	420	down
ORF_2617	effector of murein hydrolase (putative)	729	down
ORF_2618	DegV family protein	876	down
ORF_2619	conserved hypothetical protein	168	down
ORF_2625	cell surface hydrolase, membrane-bound (putative)	843	down
ORF_2626	glycerate kinase	1113	down
ORF_2628	conserved hypothetical protein	330	down
ORF_2629	adenylosuccinate lyase	1299	down
ORF_2630	adenylosuccinate synthase	1290	down
ORF_2631	guanosine 5'-monophosphate oxidoreductase	978	down
ORF_2632	protein-tyrosine phosphatase	786	down
ORF_2634	conserved hypothetical protein	150	down
ORF_2637	cation efflux protein	945	down
ORF_2641	quaternary ammonium compound-resistance protein	384	down
ORF_2642	quaternary ammonium compound-resistance protein	309	down
ORF_2644	ArsR family transcriptional regulator	345	down
ORF_2656	conserved hypothetical protein	153	down
ORF_2657	integral membrane protein (putative)	534	down
ORF_2671	resolvase	174	down
ORF_2674	conserved hypothetical protein	165	down
ORF_2677	conserved hypothetical protein	393	down
ORF_2678	hydroxymethylglutaryl-CoA synthase	1170	down
ORF_2681	protein of hypothetical function DUF896	258	down
ORF_2696	conserved hypothetical protein	165	down
ORF_2697	conserved hypothetical protein	141	down
ORF_2699	conserved hypothetical protein	477	down
ORF_2700	transcription elongation factor NusA	1218	down
ORF_2701	conserved hypothetical protein	300	down
ORF_2702	ribosomal protein HS6-type (S12/L30/L7a)	306	down
ORF_2713	alpha-acetolactate decarboxylase	711	down
ORF_2714	heat-inducible transcription repressor	1044	down
ORF_2715	co-chaperone GrpE	609	down
ORF_2716	molecular chaperone DnaK	1869	down
ORF_2717	chaperone protein DnaJ	1143	down
ORF_2724	GTP-binding protein LepA	1836	down
ORF_2725	conserved hypothetical protein	291	down
ORF_2726	conserved hypothetical protein	219	down
ORF_2727	DNA-3-methyladenine glycosylase	630	down
ORF_2728	ribosomal protein L11 methyltransferase (putative)	951	down
ORF_2729	conserved hypothetical protein	753	down
ORF_2734	conserved hypothetical protein	843	down
ORF_2741	endonuclease IV	897	down
ORF_2753	DNA primase DnaG	1881	down
ORF_2754	RNA polymerase sigma factor RpoD	1107	down
ORF_2755	conserved hypothetical protein	129	down
ORF_2756	transcription regulator	390	down
ORF_2765	conserved hypothetical protein	150	down
ORF_2766	ABC superfamily ATP binding cassette transporter, ABC protein	888	down
ORF_2767	ABC transporter, permease protein	771	down
ORF_2768	histidine protein kinase; sensor protein	1104	down
ORF_2769	response regulator	606	down
ORF_2771	conserved hypothetical protein	249	down
ORF_2772	oxidoreductase	945	down
ORF_2773	transcription regulator	891	down
ORF_2774	conserved hypothetical protein	435	down
ORF_2775	NAD-dependent epimerase/dehydratase	642	down
ORF_2776	cell surface hydrolase (putative)	816	down
ORF_2777	transcription regulator	714	down
ORF_2778	galactoside O-acetyltransferase	609	down
ORF_2779	phosphoglycolate phosphatase	669	down
ORF_2780	conserved hypothetical protein	1680	down
ORF_2782	conserved hypothetical protein	390	down
ORF_2786	NADH oxidase (putative)	1692	down
ORF_2787	succinyl-diaminopimelate desuccinylase	1146	down
ORF_2788	transcription regulator (putative)	450	down
ORF_2790	phosphopyruvate hydratase	1290	down
ORF_2791	cadmium-/manganese-transporting P-type ATPase	2277	down
ORF_2792	oxidoreductase	975	down
ORF_2793	conserved hypothetical protein	144	down
ORF_2798	phosphoenolpyruvate synthase	2397	down
ORF_2802	integral membrane protein	1206	down
ORF_2803	conserved hypothetical protein	708	down
ORF_2804	conserved hypothetical protein	1023	down
ORF_2805	peptidase T	1239	down
ORF_2806	chaperone protein ClpB	2604	down
ORF_2818	integral membrane protein	585	down
ORF_2819	conserved hypothetical protein	1044	down
ORF_2820	ATP-dependent DNA helicase RecQ	1440	down
ORF_2826	conserved hypothetical protein	1269	down
ORF_2829	dihydrodipicolinate reductase	786	down
ORF_2830	tRNA CCA-pyrophosphorylase	1224	down
ORF_2832	ABC transporter, ATP-binding protein	1911	down
ORF_2833	thymidylate synthase	951	down
ORF_2834	dihydrofolate reductase	492	down
ORF_2840	transport protein	1476	down
ORF_2847	hypothetical protein	138	down
ORF_2862	peptide-methionine (R)-S-oxide reductase	435	down
ORF_2866	integral membrane protein	1527	down
ORF_2867	glycosyltransferase (putative)	1305	down
ORF_2868	integral membrane protein	408	down
ORF_2879	lipoprotein precursor	885	down
ORF_2880	APC family amino acid-polyamine-organocation transporter	1341	down
ORF_2881	conserved hypothetical protein	186	down
ORF_2883	conserved hypothetical protein	738	down
ORF_2898	MutT/NUDIX family protein	495	down
ORF_2899	conserved hypothetical protein	726	down
ORF_2900	conserved hypothetical protein	372	down
ORF_2901	chloramphenicol O-acetyltransferase	669	down
ORF_2902	conserved hypothetical protein	120	down
ORF_2906	carbamoyl phosphate synthase large subunit	2562	down
ORF_2907	carbamoyl phosphate synthase small subunit	1083	down
ORF_2908	pyrimidine regulatory protein PyrR	525	down
ORF_2911	formate--tetrahydrofolate ligase	1656	down
ORF_2924	glycosyltransferase	1341	down
ORF_2925	conserved hypothetical protein	408	down
ORF_2928	hypothetical protein	123	down
ORF_2941	DNA replication protein DnaD	726	down
ORF_2961	potassium transport protein	777	down
ORF_2969	conserved hypothetical protein	222	down
ORF_2978	conserved hypothetical protein	249	down
ORF_2979	antibiotic biosynthesis monooxygenase subfamily	282	down
ORF_2980	chitin-binding protein/carbohydrate-binding protein	606	down
ORF_2985	conserved hypothetical protein	432	down
ORF_2986	integral membrane protein	867	down
ORF_3008	integral membrane protein	363	down
ORF_3010	aminohydrolase	1134	down
ORF_3025	conserved hypothetical protein	471	down
ORF_3026	cell surface protein	3756	down
ORF_3027	hypothetical protein	390	down
ORF_3037	cell division protein Smc	3558	down
ORF_3038	ribonuclease III	696	down
ORF_3040	putative glycerol-3-phosphate acyltransferase PlsX	1047	down
ORF_3041	DNA helicase RecG	2040	down
ORF_3051	ribosomal RNA small subunit methyltransferase B	1344	down
ORF_3052	methionyl-tRNA formyltransferase	954	down
ORF_3053	DNA replication factor Y	2418	down
ORF_3054	phosphopantothenoylcysteine decarboxylase/phosphopantothenate--cysteine ligase	1338	down
ORF_3079	conserved hypothetical protein	201	down
ORF_3089	conserved hypothetical protein	414	down
ORF_3105	MarR family transcriptional regulator	360	down
ORF_3106	conserved hypothetical protein	510	down
ORF_3108	acylphosphatase (putative)	273	down
ORF_3110	integral membrane protein	579	down
ORF_3114	conserved hypothetical protein	273	down
ORF_3115	transposase	678	down
ORF_3116	transposase	315	down
ORF_3129	transcription regulator	666	down
ORF_3134	oxidoreductase	954	down
ORF_3135	integral membrane protein	567	down
ORF_3140	conserved hypothetical protein	222	down
ORF_3143	putative transposase	237	down
ORF_3144	conserved hypothetical protein	114	down
ORF_3145	conserved hypothetical protein	144	down
ORF_3146	conserved hypothetical protein	132	down
ORF_3147	conserved hypothetical protein	132	down
ORF_3148	conserved hypothetical protein	132	down
ORF_3149	conserved hypothetical protein	2763	down
ORF_3150	conserved hypothetical protein	1977	down
ORF_3151	transcription regulator (putative)	486	down

## Sheet: FS48h_PC48h
Gene	Product	Length
ORF_0007	conserved hypothetical protein	375	up
ORF_0022	extracellular protein, gamma-D-glutamate-meso-diaminopimelate muropeptidase (putative)	732	up
ORF_0028	L-2-hydroxyisocaproate dehydrogenase	927	up
ORF_0029	transport protein	1194	up
ORF_0030	glycerol-3-phosphate cytidylyltransferase	399	up
ORF_0031	gluconate transport protein	1356	up
ORF_0032	gluconokinase	1515	up
ORF_0033	6-phosphogluconate dehydrogenase family protein	897	up
ORF_0034	glutathione reductase	1323	up
ORF_0035	peptide chain release factor 3	1578	up
ORF_0043	hypothetical protein	150	up
ORF_0044	oligopeptide ABC superfamily ATP binding cassette transporter, binding protein	1506	up
ORF_0045	oligopeptide ABC transporter, permease protein	930	up
ORF_0046	oligopeptide ABC transporter, permease protein	1035	up
ORF_0047	oligopeptide ABC transporter, ATP-binding protein	1080	up
ORF_0048	oligopeptide ABC transporter, ATP-binding protein	966	up
ORF_0052	conserved hypothetical protein	198	up
ORF_0053	phosphocarrier protein HPr	267	up
ORF_0054	phosphoenolpyruvate--protein phosphatase	1731	up
ORF_0055	glycosyltransferase	1179	up
ORF_0056	glycosyltransferase	1023	up
ORF_0057	integral membrane protein	1056	up
ORF_0059	aromatic amino acid aminotransferase	1188	up
ORF_0065	probable transcriptional regulator	213	up
ORF_0066	integral membrane protein	495	up
ORF_0067	transcription regulator	141	up
ORF_0082	tRNA uridine 5-carboxymethylaminomethyl modification enzyme GidA	1911	up
ORF_0083	tRNA modification GTPase TrmE	1392	up
ORF_0085	cell division protein	711	up
ORF_0086	hypothetical protein	141	up
ORF_0087	ribonuclease P	345	up
ORF_0088	conserved hypothetical protein	138	up
ORF_0097	30S ribosomal protein S18	237	up
ORF_0104	lipoprotein precursor, peptide binding protein OppA-like protein	1596	up
ORF_0116	cold shock protein CspA	201	up
ORF_0117	conserved hypothetical protein	225	up
ORF_0125	transcription regulator	576	up
ORF_0131	fumarate reductase, flavoprotein subunit precursor	2370	up
ORF_0141	choloylglycine hydrolase	1017	up
ORF_0144	4-hydroxyphenylacetate-3-hydroxylase	1437	up
ORF_0146	conserved hypothetical protein	624	up
ORF_0154	intracellular protease/amidase (putative)	675	up
ORF_0155	oxidoreductase	1005	up
ORF_0160	conserved hypothetical protein	168	up
ORF_0166	transcription regulator (putative)	588	up
ORF_0174	conserved hypothetical protein	306	up
ORF_0175	Na+/H+ antiporter NhaC	1425	up
ORF_0195	choloylglycine hydrolase	987	up
ORF_0196	copper transporting ATPase	2040	up
ORF_0198	transcription regulator	429	up
ORF_0201	lincomycin resistance protein LmrB	1434	up
ORF_0206	MFS family major facilitator transporter, multidrug:cation symporter MdtG	1224	up
ORF_0207	cell surface hydrolase	939	up
ORF_0208	conserved hypothetical protein	471	up
ORF_0226	conserved hypothetical protein	435	up
ORF_0227	cation transporting P-type ATPase	2676	up
ORF_0228	NAD synthetase	828	up
ORF_0229	nicotinate phosphoribosyltransferase	1479	up
ORF_0234	transport protein	822	up
ORF_0239	conserved hypothetical protein	834	up
ORF_0240	di-/tripeptide transport protein	1473	up
ORF_0266	galactose operon repressor	996	up
ORF_0267	aldose 1-epimerase	1035	up
ORF_0268	sugar transport protein	1959	up
ORF_0269	alpha-galactosidase	2217	up
ORF_0270	beta-galactosidase, small subunit	960	up
ORF_0271	beta-galactosidase large subunit	1881	up
ORF_0272	galactokinase	1164	up
ORF_0273	UDP-glucose 4-epimerase	1005	up
ORF_0274	UDP-glucose--hexose-1-phosphate uridylyltransferase	1464	up
ORF_0275	galactose operon repressor	1002	up
ORF_0286	branched-chain amino acid transport protein	540	up
ORF_0287	branched-chain amino acid transport protein	303	up
ORF_0288	transcription regulator	600	up
ORF_0290	ferrichrome ABC transporter, ATP-binding protein	795	up
ORF_0291	ferrichrome ABC transporter, permease protein	999	up
ORF_0292	ferrichrome ABC transporter, permease protein	996	up
ORF_0293	TetR family transcriptional regulator	513	up
ORF_0306	conserved hypothetical protein	162	up
ORF_0308	pyrophosphatase (putative)	825	up
ORF_0310	fumarate reductase	1482	up
ORF_0317	6-phospho-beta-glucosidase	1452	up
ORF_0331	conserved hypothetical protein	1080	up
ORF_0332	conserved hypothetical protein	564	up
ORF_0333	prophage Lp4 protein 1, integrase	1158	up
ORF_0335	conserved hypothetical protein	669	up
ORF_0336	prophage Lp2 protein 8	432	up
ORF_0337	prophage Lp1 protein 8	378	up
ORF_0338	conserved hypothetical protein	210	up
ORF_0339	conserved hypothetical protein	273	up
ORF_0340	Gp40 protein	450	up
ORF_0341	conserved hypothetical protein	141	up
ORF_0342	hypothetical protein	171	up
ORF_0343	hypothetical protein	168	up
ORF_0344	conserved hypothetical protein	252	up
ORF_0345	conserved hypothetical protein	480	up
ORF_0346	Helicase-like protein:Type III restriction enzyme, res subunit:DEAD/DEAH box helicase-like protein	1260	up
ORF_0347	phage NTP-binding protein	717	up
ORF_0348	conserved hypothetical protein	600	up
ORF_0349	conserved hypothetical protein	555	up
ORF_0350	prophage Lp3 protein 7	795	up
ORF_0351	prophage Lp3 protein 8, helicase	1275	up
ORF_0352	phage protein	333	up
ORF_0353	conserved hypothetical protein	225	up
ORF_0354	prophage Lp1 protein 30	357	up
ORF_0355	hypothetical protein	435	up
ORF_0356	putative uncharacterized protein	183	up
ORF_0358	hypothetical protein	681	up
ORF_0359	hypothetical protein	171	up
ORF_0360	conserved hypothetical protein	216	up
ORF_0361	hypothetical protein	228	up
ORF_0362	putative uncharacterized protein	243	up
ORF_0363	terminase	1680	up
ORF_0364	phage portal protein, HK97 family	1143	up
ORF_0365	Clp protease domain protein	753	up
ORF_0366	major head protein Cps	1179	up
ORF_0367	putative uncharacterized protein	306	up
ORF_0368	Gp8 protein	213	up
ORF_0369	gp9 protein	408	up
ORF_0370	gp10 protein	423	up
ORF_0371	putative major tail protein	612	up
ORF_0372	putative uncharacterized protein	315	up
ORF_0373	hypothetical protein	222	up
ORF_0374	phage tail tape measure protein	4545	up
ORF_0375	putative uncharacterized protein	822	up
ORF_0376	reticulocyte binding protein	4947	up
ORF_0377	conserved hypothetical protein	483	up
ORF_0378	conserved hypothetical protein	435	up
ORF_0379	conserved hypothetical protein	378	up
ORF_0380	conserved hypothetical protein	273	up
ORF_0381	conserved hypothetical protein	285	up
ORF_0382	prophage Lp2 protein 56, lysin	933	up
ORF_0387	conserved hypothetical protein	432	up
ORF_0388	manganese transport protein	1593	up
ORF_0419	possible toxin regulator	1095	up
ORF_0423	integral membrane protein	972	up
ORF_0424	conserved hypothetical protein	1449	up
ORF_0427	transcription regulator	903	up
ORF_0446	transcription regulator	912	up
ORF_0453	conserved hypothetical protein	831	up
ORF_0462	ABC transporter, ATP-binding and permease protein	1788	up
ORF_0471	maltose O-acetyltransferase	570	up
ORF_0479	phosphoglycerate mutase (putative)	639	up
ORF_0496	ABC transporter, permease protein (putative)	1218	up
ORF_0497	ABC superfamily ATP binding cassette transporter, ABC protein	900	up
ORF_0525	copper-exporting ATPase	375	up
ORF_0526	copper-exporting ATPase	270	up
ORF_0527	P-ATPase superfamily P-type ATPase copper transporter	1866	up
ORF_0530	extracellular protein	396	up
ORF_0559	extracellular protein	663	up
ORF_0560	extracellular protein	615	up
ORF_0563	6-phospho-beta-glucosidase	1383	up
ORF_0564	cellobiose PTS, EIIC	1473	up
ORF_0565	cellobiose PTS, EIIB	327	up
ORF_0576	amino acid transport protein	702	up
ORF_0577	integral membrane protein	327	up
ORF_0594	conserved hypothetical protein	1233	up
ORF_0595	dipeptidase	1407	up
ORF_0596	conserved hypothetical protein	135	up
ORF_0597	aspartate--ammonia ligase	1008	up
ORF_0598	asparaginyl-tRNA synthetase	1296	up
ORF_0599	acyl carrier protein phosphodiesterase	630	up
ORF_0600	transcription regulator	474	up
ORF_0639	conserved hypothetical protein	267	up
ORF_0641	conserved hypothetical protein	153	up
ORF_0642	bifunctional GMP synthase/glutamine amidotransferase protein	1557	up
ORF_0643	pantothenate kinase	930	up
ORF_0649	phosphoglycerate mutase	657	up
ORF_0650	phosphoglycerate mutase	678	up
ORF_0653	GTPase	1296	up
ORF_0655	transport protein	558	up
ORF_0683	amino acid permease	1398	up
ORF_0684	transposase	303	up
ORF_0686	Xaa-Pro dipeptidyl-peptidase	2442	up
ORF_0689	prolyl aminopeptidase	930	up
ORF_0692	pyruvate oxidase	1740	up
ORF_0696	lipopolysaccharide biosynthesis protein LicD	810	up
ORF_0697	exopolyphosphatase	1530	up
ORF_0698	polyphosphate kinase	2157	up
ORF_0699	exopolyphosphatase	954	up
ORF_0706	hypothetical protein	135	up
ORF_0708	conserved hypothetical protein	747	up
ORF_0714	conserved hypothetical protein	234	up
ORF_0715	cobalt ABC transporter, ATP-binding protein (putative)	732	up
ORF_0732	NTP pyrophosphohydrolase	471	up
ORF_0733	amino acid transport protein	1365	up
ORF_0736	cation transporting P-type ATPase	2739	up
ORF_0737	purine nucleoside phosphorylase (putative)	759	up
ORF_0739	oxidoreductase (putative)	603	up
ORF_0747	transport protein	1194	up
ORF_0753	conserved hypothetical protein	1518	up
ORF_0757	conserved hypothetical protein	561	up
ORF_0758	conserved hypothetical protein	129	up
ORF_0759	transcription regulator	753	up
ORF_0769	integral membrane protein	513	up
ORF_0772	glycerone kinase	999	up
ORF_0773	dihydroxyacetone kinase phosphatase domain-containing protein	582	up
ORF_0774	conserved hypothetical protein	369	up
ORF_0775	glycerol uptake facilitator protein	708	up
ORF_0777	transcription regulator	963	up
ORF_0778	alpha-glucosidase	1674	up
ORF_0781	maltose/maltodextrin ABC transporter, permease protein	885	up
ORF_0782	maltodextrose utilization protein MalA	831	up
ORF_0783	alpha-amylase	1323	up
ORF_0784	multiple sugar ABC transporter, ATP-binding protein	1107	up
ORF_0785	maltose phosphorylase	2271	up
ORF_0788	fructokinase	867	up
ORF_0789	sucrose PTS, EIIBCA	1956	up
ORF_0790	beta-fructofuranosidase	1506	up
ORF_0791	sucrose operon repressor	981	up
ORF_0792	alpha-glucosidase	1677	up
ORF_0794	Na+/H+ antiporter NhaC	1401	up
ORF_0797	conserved hypothetical protein	474	up
ORF_0799	2,3-cyclic-nucleotide 2-phosphodiesterase, putative	1551	up
ORF_0803	integral membrane protein	462	up
ORF_0815	transcription regulator	639	up
ORF_0816	phosphoenolpyruvate carboxykinase (ATP)	1662	up
ORF_0819	extracellular protein, gamma-D-glutamate-meso-diaminopimelate muropeptidase (putative)	1068	up
ORF_0825	conserved hypothetical protein	579	up
ORF_0826	iron dependent peroxidase (putative)	954	up
ORF_0827	ubiquinone/menaquinone biosynthesis methyltransferase	714	up
ORF_0828	conserved hypothetical protein	696	up
ORF_0830	NADH peroxidase	1356	up
ORF_0835	homoserine O-succinyltransferase	876	up
ORF_0836	O-acetylhomoserine (thiol)-lyase	1287	up
ORF_0837	homoserine dehydrogenase	1281	up
ORF_0839	2-dehydropantoate 2-reductase	975	up
ORF_0842	ring-cleaving dioxygenase (putative)	450	up
ORF_0845	diguanylate cyclase/phosphodiesterase domain-containing protein	1137	up
ORF_0848	transcription regulator, AsnC-type	465	up
ORF_0858	unknown	270	up
ORF_0859	conserved hypothetical protein	1344	up
ORF_0863	sugar transport protein	858	up
ORF_0864	glucose-6-phosphate isomerase	1353	up
ORF_0880	glycerol kinase	1518	up
ORF_0881	glycerol-3-phosphate dehydrogenase	1830	up
ORF_0882	glycerol uptake facilitator protein	720	up
ORF_0887	ribonucleotide-diphosphate reductase subunit alpha	2154	up
ORF_0888	Ribonucleoside-diphosphate reductase beta subunit	933	up
ORF_0889	ribonucleoside-diphosphate reductase beta subunit	951	up
ORF_0890	conserved hypothetical protein	564	up
ORF_0897	conserved hypothetical protein	861	up
ORF_0898	amino acid ABC transporter, permease protein	678	up
ORF_0899	ABC superfamily ATP binding cassette transporter, binding protein	1077	up
ORF_0900	GAF domain protein	480	up
ORF_0901	APC family amino acid-polyamine-organocation transporter	213	up
ORF_0902	amino acid permease-associated region	1386	up
ORF_0903	Hin-like DNA-binding protein	288	up
ORF_0904	hypothetical protein	162	up
ORF_0926	argininosuccinate synthase	1236	up
ORF_0927	argininosuccinate lyase	1404	up
ORF_0931	conserved hypothetical protein	933	up
ORF_0932	lipoprotein precursor, peptide binding protein OppA-like protein	1653	up
ORF_0942	chloride channel protein	1554	up
ORF_0944	carboxylesterase	750	up
ORF_0945	ribonuclease R	2415	up
ORF_0946	SsrA-binding protein	471	up
ORF_0948	glutamine ABC superfamily ATP binding cassette transporter, substrate binding and permease protein	1437	up
ORF_0963	protein of hypothetical function DUF147	843	up
ORF_0964	conserved hypothetical protein	978	up
ORF_0965	phosphoglucosamine mutase	1356	up
ORF_0979	peptidylprolyl isomerase	585	up
ORF_0980	integral membrane protein	657	up
ORF_0987	amino acid transport protein	1386	up
ORF_1001	catabolite control protein A	1011	up
ORF_1003	Xaa-Pro dipeptidase	1110	up
ORF_1021	alanine--tRNA ligase	2643	up
ORF_1025	translocase subunit	384	up
ORF_1036	accesory gene regulator protein B	603	up
ORF_1037	accessory gene regulator protein C	1263	up
ORF_1038	response regulator; accesory gene regulator protein A	744	up
ORF_1058	L-ribulokinase (putative)	1602	up
ORF_1059	L-ribulose-5-phosphate 4-epimerase	729	up
ORF_1060	L-arabinose isomerase	1425	up
ORF_1063	putative phosphoketolase	2391	up
ORF_1064	transcription regulator	768	up
ORF_1065	galacitol PTS, EIIA	471	up
ORF_1066	galactitol PTS, EIIB	297	up
ORF_1067	galacitol PTS, EIIC	1272	up
ORF_1068	L-iditol 2-dehydrogenase	1110	up
ORF_1083	transcription antiterminator	849	up
ORF_1084	beta-glucosides PTS, EIIBCA	2001	up
ORF_1085	6-phospho-beta-glucosidase	1464	up
ORF_1086	6-phospho-beta-glucosidase	1443	up
ORF_1089	PTS family porter, enzyme I	1497	up
ORF_1095	integral membrane protein	516	up
ORF_1097	formate C-acetyltransferase	2259	up
ORF_1098	formate acetyltransferase activating enzyme	687	up
ORF_1108	extracellular protein	804	up
ORF_1109	extracellular protein	639	up
ORF_1110	glycine cleavage system	375	up
ORF_1115	acetate kinase	1197	up
ORF_1122	spermidine/putrescine ABC transporter, substrate binding protein	1071	up
ORF_1123	spermidine/putrescine ABC transporter, permease protein	816	up
ORF_1124	spermidine/putrescine ABC superfamily ATP binding cassette transporter, permease protein	834	up
ORF_1131	transcription regulator	354	up
ORF_1132	ABC transporter, ATP-binding protein	894	up
ORF_1133	conserved hypothetical protein	1014	up
ORF_1135	fructose-bisphosphate aldolase	864	up
ORF_1138	conserved hypothetical protein	903	up
ORF_1139	conserved hypothetical protein	201	up
ORF_1153	L-2-hydroxyisocaproate dehydrogenase	960	up
ORF_1154	integral membrane protein	270	up
ORF_1164	ribonucleoside hydrolase RihC	921	up
ORF_1172	transcription regulator	828	up
ORF_1175	putative uncharacterized protein	945	up
ORF_1177	methylated-DNA--	501	up
ORF_1181	type III restriction protein res subunit	1377	up
ORF_1183	conserved hypothetical protein	2016	up
ORF_1184	hypothetical protein	465	up
ORF_1187	serine O-acetyltransferase	177	up
ORF_1191	alpha-D-GlcNAc alpha-1,2-L-rhamnosyltransferase	228	up
ORF_1192	IS30 family transposase	921	up
ORF_1195	negative regulator of proteolysis	399	up
ORF_1204	conserved hypothetical protein	1020	up
ORF_1208	rRNA large subunit methyltransferase A	855	up
ORF_1210	branched-chain amino acid transport protein	1350	up
ORF_1214	hypothetical protein	120	up
ORF_1225	cell division protein FtsA	1347	up
ORF_1226	cell division protein FtsZ	1284	up
ORF_1227	cell division protein (putative)	423	up
ORF_1228	YlmG protein	270	up
ORF_1229	cell division protein (putative)	786	up
ORF_1230	cell division initiation protein DivIVA	699	up
ORF_1231	isoleucyl-tRNA synthetase	2799	up
ORF_1253	extracellular protein, gamma-D-glutamate-meso-diaminopimelate muropeptidase (putative)	1491	up
ORF_1259	peptide deformylase	567	up
ORF_1260	pyruvate dehydrogenase complex, E1 component, alpha subunit	1113	up
ORF_1261	pyruvate dehydrogenase complex, E1 component, beta subunit	732	up
ORF_1262	pyruvate dehydrogenase complex dihydrolipoamide acetyltransferase	1317	up
ORF_1263	dihydrolipoamide dehydrogenase	1413	up
ORF_1276	amino acid transport protein	1383	up
ORF_1277	homocysteine methyltransferase	930	up
ORF_1279	integral membrane protein	720	up
ORF_1280	S-adenosylmethionine synthetase	1188	up
ORF_1292	leucyl-tRNA synthetase	2427	up
ORF_1302	glycerophosphodiester phosphodiesterase	687	up
ORF_1303	deoxyguanosine kinase	648	up
ORF_1320	extracellular protein, membrane-anchored (putative)	339	up
ORF_1327	lipoprotein precursor	426	up
ORF_1328	conserved hypothetical protein	120	up
ORF_1329	conserved hypothetical protein	1014	up
ORF_1332	bifunctional homocysteine S-methyltransferase/5,10-methylenetetrahydrofolate reductase protein	1857	up
ORF_1333	5-methyltetrahydropteroyltriglutamate--homocysteine S-methyltransferase	2307	up
ORF_1345	arginine--tRNA ligase	1689	up
ORF_1362	transaminase	1122	up
ORF_1363	arginine catabolic regulator	462	up
ORF_1365	penicillin binding protein 2A	2130	up
ORF_1374	oxidoreductase (putative)	615	up
ORF_1377	conserved hypothetical protein	441	up
ORF_1390	GTP cyclohydrolase II	1215	up
ORF_1391	riboflavin synthase, beta chain	480	up
ORF_1392	conserved hypothetical protein	561	up
ORF_1403	peptidylprolyl isomerase	897	up
ORF_1407	ABC transporter, permease protein	1206	up
ORF_1414	conserved hypothetical protein	165	up
ORF_1415	FeoB family ferrous iron (Fe2+) uptake protein	1989	up
ORF_1416	conserved hypothetical protein	225	up
ORF_1431	threonine-tRNA ligase 1	1965	up
ORF_1436	recombination factor protein RarA	1263	up
ORF_1450	conserved hypothetical protein	555	up
ORF_1451	hypothetical protein	117	up
ORF_1458	hypothetical protein	228	up
ORF_1470	conserved hypothetical protein	252	up
ORF_1471	conserved hypothetical protein	933	up
ORF_1472	putative glycosyl transferase	990	up
ORF_1473	polysaccharide polymerase	1230	up
ORF_1474	putative glycosyl transferase	960	up
ORF_1475	putative lipopolysaccharide biosynthesis protein	1428	up
ORF_1476	capsular polysaccharide biosynthesis protein CpsI	1020	up
ORF_1477	CDP-glycerol:poly(glycerophosphate) glycerophosphotransferase	1194	up
ORF_1478	EpsIIN, glycerol-3-phosphate cytidylyltransferase	375	up
ORF_1482	transposase is4 family protein	252	up
ORF_1487	acetate kinase	1188	up
ORF_1488	conserved hypothetical protein	192	up
ORF_1489	integral membrane protein	351	up
ORF_1490	integral membrane protein	384	up
ORF_1492	ABC transporter, permease protein	660	up
ORF_1493	ABC transporter, ATP-binding protein	1407	up
ORF_1494	ABC transporter subunit (putative)	570	up
ORF_1501	dipeptidase	1416	up
ORF_1504	mannitol PTS, EIIA	450	up
ORF_1505	mannitol-1-phosphate 5-dehydrogenase	1158	up
ORF_1506	conserved hypothetical protein	552	up
ORF_1521	serine O-acetyltransferase	543	up
ORF_1522	cystathionine beta-lyase	1146	up
ORF_1523	cysteine synthase	912	up
ORF_1536	transcription regulator	690	up
ORF_1547	cellobiose PTS, EIIC	1326	up
ORF_1554	transcription regulator (putative)	573	up
ORF_1555	transport protein	3954	up
ORF_1563	integral membrane protein	1590	up
ORF_1575	ribosomal protein S15	270	up
ORF_1577	dihydrodipicolinate synthase	873	up
ORF_1578	metallo-beta-lactamase superfamily protein (putative)	1725	up
ORF_1579	conserved hypothetical protein	915	up
ORF_1581	trigger factor	1323	up
ORF_1588	glutamine ABC transporter, ATP-binding protein	741	up
ORF_1600	fructose PTS, EIIABC	1968	up
ORF_1603	obg family GTPase CgtA	1296	up
ORF_1604	conserved hypothetical protein	285	up
ORF_1605	conserved hypothetical protein	114	up
ORF_1612	integral membrane protein	1212	up
ORF_1613	conserved hypothetical protein	348	up
ORF_1626	ABC transporter, permease protein (putative)	1068	up
ORF_1627	ABC transporter, ATP-binding protein	681	up
ORF_1630	reductase (putative)	540	up
ORF_1633	malate transport protein (putative)	927	up
ORF_1639	lipoprotein precursor, peptide binding protein OppA-like protein	1662	up
ORF_1640	possible acetyltransferase	444	up
ORF_1641	phosphoglycerate dehydrogenase	1179	up
ORF_1642	phosphoserine aminotransferase	1074	up
ORF_1645	conserved hypothetical protein	222	up
ORF_1646	conserved hypothetical protein	351	up
ORF_1647	adherence protein	366	up
ORF_1679	zinc-dependent proteinase	1302	up
ORF_1680	conserved hypothetical protein	1266	up
ORF_1682	aspartate kinase	1353	up
ORF_1683	glutamine ABC transporter, substrate binding protein	840	up
ORF_1684	glutamine ABC transporter, ATP-binding protein	642	up
ORF_1690	cell shape determining protein MreB	1005	up
ORF_1693	valyl-tRNA synthetase	2670	up
ORF_1701	30S ribosomal protein S4	609	up
ORF_1702	conserved hypothetical protein	627	up
ORF_1717	amino acid ABC transporter, substrate binding protein	825	up
ORF_1718	amino acid ABC transporter, permease protein	693	up
ORF_1719	amino acid ABC transporter, ATP-binding protein	1032	up
ORF_1726	UDP-N-acetylglucosamine 1-carboxyvinyltransferase	1317	up
ORF_1727	F0F1 ATP synthase subunit epsilon	429	up
ORF_1728	F0F1 ATP synthase subunit beta	1404	up
ORF_1748	branched-chain amino acid aminotransferase	1029	up
ORF_1750	lipoprotein	972	up
ORF_1751	ABC transporter, ATP-binding and permease protein	1890	up
ORF_1752	multidrug resistance ABC superfamily ATP binding cassette transporter, ABC/membrane protein	1731	up
ORF_1798	HsdR family type I site-specific deoxyribonuclease	3138	up
ORF_1799	HsdS, type I site-specific deoxyribonuclease	1188	up
ORF_1800	conserved hypothetical protein	1527	up
ORF_1801	putative type I site-specific deoxyribonuclease	1374	up
ORF_1802	conserved hypothetical protein	363	up
ORF_1822	conserved hypothetical protein	234	up
ORF_1826	pyruvate oxidase	1812	up
ORF_1844	N-acetylglucosamine and glucose PTS, EIICBA	1908	up
ORF_1845	mannose-6-phosphate isomerase	1332	up
ORF_1849	mannose-6-phosphate isomerase	1344	up
ORF_1850	hypothetical protein	123	up
ORF_1851	6-phospho-beta-glucosidase	1458	up
ORF_1852	phosphoenolpyruvate-dependent sugar phosphotransferase system EIIC, putative cellobiose specific	1293	up
ORF_1858	sugar transport protein	1386	up
ORF_1859	alpha-glucosidase	1677	up
ORF_1887	putative ribose uptake protein rbsU	885	up
ORF_1888	D-ribose pyranase	396	up
ORF_1889	ribokinase	921	up
ORF_1892	xylose isomerase	1350	up
ORF_1894	alpha-glucosidase, family 31 of glycosyl hydrolase	2289	up
ORF_1895	RecName: Full=Putative xylose-proton symporter; AltName: Full=Xylose transporter >gi|3688059|gb|AAC62250.1| isoprimeverose cation-symporter XylP	1440	up
ORF_1898	regulator of phenolic acid metabolism PadR	546	up
ORF_1899	p-coumaric acid decarboxylase	537	up
ORF_1900	2-oxo-hept-3-ene-1,7-dioate hydratase; 2-oxo-hept-4-ene-1,7-dioate hydratase	801	up
ORF_1930	16S RNA methylase	609	up
ORF_1932	ribonucleotide-diphosphate reductase subunit alpha	2166	up
ORF_1933	ribonucleotide-diphosphate reductase subunit beta	1011	up
ORF_1934	conserved hypothetical protein	576	up
ORF_1935	Lysyl-tRNA synthetase (class II)	2604	up
ORF_1936	prophage Lp1 protein 66, lipoprotein precursor	669	up
ORF_1937	prophage Lp1 protein 65	978	up
ORF_1938	ribosomal protein L7/L12	369	up
ORF_1939	ribosomal protein L10	504	up
ORF_1940	50S ribosomal protein L1	690	up
ORF_1941	50S ribosomal protein L11	426	up
ORF_1951	glutamyl-tRNA synthetase	1491	up
ORF_1958	cysteine aminopeptidase	1332	up
ORF_1961	transport protein	1026	up
ORF_1962	malate transport protein	963	up
ORF_1963	transcription regulator	1194	up
ORF_1993	conserved hypothetical protein	441	up
ORF_2001	cold shock protein CspP	201	up
ORF_2009	RNA methyltransferase	1374	up
ORF_2033	amino acid transport protein	1428	up
ORF_2034	malate transport protein	972	up
ORF_2035	malate dehydrogenase	1644	up
ORF_2039	fumarate reductase subunit A	1389	up
ORF_2040	fumarate hydratase	1383	up
ORF_2042	citrate (pro-3S)-lyase	1539	up
ORF_2043	citrate lyase, beta chain	915	up
ORF_2047	citrate lyase regulator	963	up
ORF_2067	30S ribosomal protein S9	393	up
ORF_2068	50S ribosomal protein L13	444	up
ORF_2080	ribosomal protein L17	384	up
ORF_2081	DNA-directed RNA polymerase subunit alpha	945	up
ORF_2082	30S ribosomal protein S11	390	up
ORF_2083	30S ribosomal protein S13	366	up
ORF_2084	translation initiation factor IF-1	219	up
ORF_2085	adenylate kinase	660	up
ORF_2086	preprotein translocase subunit SecY	1134	up
ORF_2087	ribosomal protein L15	432	up
ORF_2088	50S ribosomal protein L30	183	up
ORF_2089	30S ribosomal protein S5	501	up
ORF_2090	ribosomal protein L18	357	up
ORF_2091	50S ribosomal protein L6	537	up
ORF_2092	30S ribosomal protein S8	396	up
ORF_2093	50S ribosomal protein L5	543	up
ORF_2094	ribosomal protein L24	312	up
ORF_2095	ribosomal protein L14	369	up
ORF_2096	30S ribosomal protein S17	270	up
ORF_2097	50S ribosomal protein L29	195	up
ORF_2098	50S ribosomal protein L16	435	up
ORF_2099	30S ribosomal protein S3	654	up
ORF_2100	50S ribosomal protein L22	348	up
ORF_2101	30S ribosomal protein S19	276	up
ORF_2102	50S ribosomal protein L2	840	up
ORF_2103	50S ribosomal protein L23	294	up
ORF_2104	50S ribosomal protein L4	624	up
ORF_2105	50S ribosomal protein L3	630	up
ORF_2107	elongation factor G	2097	up
ORF_2108	30S ribosomal protein S7	471	up
ORF_2109	30S ribosomal protein S12	414	up
ORF_2111	DNA-directed RNA polymerase subunit beta'	3654	up
ORF_2112	DNA-directed RNA polymerase subunit beta	3606	up
ORF_2117	seryl-tRNA synthetase	1278	up
ORF_2121	lysine transport protein	1452	up
ORF_2122	conserved hypothetical protein	117	up
ORF_2127	phosphatase (putative)	663	up
ORF_2128	transcription regulator	1038	up
ORF_2131	cold shock protein CspC	201	up
ORF_2135	multidrug transport protein	1479	up
ORF_2136	conserved hypothetical protein	723	up
ORF_2137	hypothetical protein	132	up
ORF_2141	lysin	1302	up
ORF_2142	conserved hypothetical protein	666	up
ORF_2151	conserved hypothetical protein	540	up
ORF_2158	conserved hypothetical protein	1395	up
ORF_2159	conserved hypothetical protein	639	up
ORF_2170	carbamoyl-phosphate synthase, large subunit	3063	up
ORF_2171	ABC superfamily ATP binding cassette transporter, ABC protein	771	up
ORF_2172	Putative aliphatic sulfonates transport permease protein ssuC	1014	up
ORF_2173	NMT1/THI5 like protein	1053	up
ORF_2181	exopolysaccharide biosynthesis protein	771	up
ORF_2190	imidazole glycerol phosphate synthase, cyclase subunit	759	up
ORF_2192	imidazole glycerol phosphate synthase subunit HisH	627	up
ORF_2194	histidinol dehydrogenase	1287	up
ORF_2195	ATP phosphoribosyltransferase	657	up
ORF_2196	histidine--tRNA ligase (putative)	1152	up
ORF_2197	histidinol-phosphatase	819	up
ORF_2199	MIT family Mg2+ and Co2+ transporter	909	up
ORF_2200	conserved hypothetical protein	348	up
ORF_2204	aspartate-semialdehyde dehydrogenase	1062	up
ORF_2211	sulfatase domain protein	2154	up
ORF_2212	glycerophosphodiester phosphodiesterase	1794	up
ORF_2213	thioredoxin reductase (NADPH)	996	up
ORF_2219	ribonuclease H (putative)	897	up
ORF_2222	transcription regulator	864	up
ORF_2226	Na(+)/H(+) antiporter	2004	up
ORF_2227	conserved hypothetical protein	129	up
ORF_2237	conserved hypothetical protein	852	up
ORF_2240	pyruvate oxidase	1758	up
ORF_2243	cystathionine gamma-synthase	1122	up
ORF_2246	conserved hypothetical protein	507	up
ORF_2258	BetT protein	198	up
ORF_2260	phosphoketolase	2367	up
ORF_2265	HD domain protein	657	up
ORF_2266	response regulator	750	up
ORF_2267	conserved hypothetical protein	525	up
ORF_2271	integral membrane protein	1368	up
ORF_2272	conserved hypothetical protein	486	up
ORF_2287	acetyltransferase (putative)	525	up
ORF_2288	ATP-dependent nuclease subunit A	3750	up
ORF_2289	exonuclease RexB	3606	up
ORF_2299	purine transport regulator	1590	up
ORF_2300	xanthine permease	1341	up
ORF_2302	xanthine/uracil permease	1251	up
ORF_2330	transcription regulator	372	up
ORF_2331	ABC transporter, ATP-binding protein	879	up
ORF_2332	ABC superfamily ATP binding cassette transporter, permease protein	810	up
ORF_2335	teichoic acid glycosylation protein	417	up
ORF_2343	threonine synthase	1494	up
ORF_2344	cof family hydrolase	798	up
ORF_2345	pentapeptide repeats containing protein	636	up
ORF_2356	ABC superfamily ATP binding cassette transporter, permease protein	1212	up
ORF_2357	ABC transporter, ATP-binding protein	744	up
ORF_2367	HAD superfamily hydrolase	834	up
ORF_2368	2-dehydropantoate 2-reductase	1020	up
ORF_2372	conserved hypothetical protein	2148	up
ORF_2383	capsular polysaccharide biosynthesis protein	807	up
ORF_2384	exopolysaccharide biosynthesis protein; chain length determinator Wzz	564	up
ORF_2387	heat shock protein HtpX	900	up
ORF_2390	conserved hypothetical protein	1137	up
ORF_2391	ribosomal protein L31	246	up
ORF_2392	transcription termination factor Rho	1293	up
ORF_2393	UDP-N-acetylglucosamine 1-carboxyvinyltransferase	1281	up
ORF_2414	purine operon repressor	837	up
ORF_2418	zinc/iron ABC transporter, permease protein	804	up
ORF_2419	zinc/iron ABC transporter, ATP-binding protein	699	up
ORF_2424	dimethyladenosine transferase	888	up
ORF_2425	conserved hypothetical protein	540	up
ORF_2426	DNAse (putative)	777	up
ORF_2427	drug resistance transporter	1185	up
ORF_2428	methionine--tRNA ligase	2052	up
ORF_2437	conserved hypothetical protein	795	up
ORF_2438	conserved hypothetical protein	1116	up
ORF_2448	tryptophanyl-tRNA synthetase II	1017	up
ORF_2449	carbon-nitrogen family hydrolase	777	up
ORF_2475	transcription regulator	873	up
ORF_2476	HAD superfamily hydrolase	792	up
ORF_2477	transport protein	1155	up
ORF_2478	galactoside O-acetyltransferase	618	up
ORF_2516	NrdI family protein	438	up
ORF_2517	ribonucleoside-diphosphate reductase	2169	up
ORF_2518	ribonucleoside-diphosphate reductase beta subunit	927	up
ORF_2519	ribonucleoside-diphosphate reductase beta subunit	951	up
ORF_2547	cyclopropane-fatty-acyl-phospholipid synthase	1194	up
ORF_2557	integral membrane protein	351	up
ORF_2564	peptidyl-prolyl cis-trans isomerase	930	up
ORF_2566	integral membrane protein	726	up
ORF_2567	translation-associated GTPase	1101	up
ORF_2568	conserved hypothetical protein	192	up
ORF_2569	chromosome partitioning protein, DNA-binding protein	891	up
ORF_2570	chromosome partitioning protein, membrane-associated ATPase	768	up
ORF_2571	chromosome partitioning protein, DNA-binding protein	852	up
ORF_2572	16S rRNA methyltransferase GidB	735	up
ORF_2573	nucleoside transport protein	1284	up
ORF_2581	amino acid ABC transporter, substrate binding protein	816	up
ORF_2583	transcription regulator (putative)	318	up
ORF_2584	integral membrane protein (putative)	639	up
ORF_2585	conserved hypothetical protein	936	up
ORF_2587	alpha-glucosidase	1668	up
ORF_2615	acetyltransferase (putative)	552	up
ORF_2620	zinc-dependent proteinase (putative)	699	up
ORF_2622	squalene synthase	1497	up
ORF_2623	phytoene synthase	882	up
ORF_2633	cardiolipin synthetase 2	1449	up
ORF_2639	conserved hypothetical protein	123	up
ORF_2640	conserved hypothetical protein	1119	up
ORF_2643	hemolysin III	639	up
ORF_2648	conserved hypothetical protein	168	up
ORF_2658	ABC superfamily ATP binding cassette transporter, binding protein	981	up
ORF_2664	4'-phosphopantetheinyl transferase, CesP	717	up
ORF_2670	transcriptional activator	2529	up
ORF_2675	glycosyltransferase	942	up
ORF_2686	D-lactate dehydrogenase	999	up
ORF_2687	HAD superfamily hydrolase	723	up
ORF_2689	elongation factor Ts	879	up
ORF_2695	prolyl-tRNA synthetase	1710	up
ORF_2705	transport protein	1455	up
ORF_2706	chorismate synthase	1170	up
ORF_2707	conserved hypothetical protein	528	up
ORF_2708	3-phosphoshikimate 1-carboxyvinyltransferase	1299	up
ORF_2709	prephenate dehydrogenase	1098	up
ORF_2710	shikimate kinase	522	up
ORF_2711	pseudouridylate synthase	924	up
ORF_2718	serine-type D-Ala-D-Ala carboxypeptidase	1176	up
ORF_2719	D-Ala-teichoic acid biosynthesis protein (putative)	150	up
ORF_2720	D-alanine--D-alanyl carrier protein ligase	1527	up
ORF_2721	D-alanyl transfer protein DltB	1215	up
ORF_2722	D-alanine--poly(phosphoribitol) ligase subunit 2	237	up
ORF_2723	D-alanyl transfer protein DltD	1278	up
ORF_2736	histidyl-tRNA synthetase	1281	up
ORF_2737	aspartyl-tRNA synthetase	1797	up
ORF_2738	protein-methionine-S-oxide reductase	531	up
ORF_2739	integral membrane protein	876	up
ORF_2743	conserved hypothetical protein	819	up
ORF_2746	phosphate starvation-inducible protein	978	up
ORF_2747	conserved hypothetical protein	480	up
ORF_2748	diacylglycerol kinase	270	up
ORF_2749	GTP-binding protein Era	909	up
ORF_2750	recombination protein O	789	up
ORF_2751	glycyl-tRNA synthetase subunit alpha	900	up
ORF_2752	glycine-tRNA ligase, beta chain	2085	up
ORF_2759	ABC transporter, permease protein	1059	up
ORF_2760	ABC superfamily ATP binding cassette transporter, membrane protein	753	up
ORF_2761	ABC transporter, ATP-binding protein	900	up
ORF_2762	integral membrane protein	606	up
ORF_2764	acetyltransferase (putative)	468	up
ORF_2789	transport protein	1395	up
ORF_2800	ABC transporter, ATP-binding protein	942	up
ORF_2801	ABC transporter, permease protein	771	up
ORF_2807	integral membrane protein	201	up
ORF_2809	6-phosphofructokinase	963	up
ORF_2810	pyruvate kinase	1761	up
ORF_2811	integral membrane protein	459	up
ORF_2812	conserved hypothetical protein	888	up
ORF_2825	DNA-binding protein II	276	up
ORF_2841	bacterial luciferase	1059	up
ORF_2842	conserved hypothetical protein	699	up
ORF_2845	transcription regulator	930	up
ORF_2846	conserved hypothetical protein	1149	up
ORF_2850	DNA processing protein	867	up
ORF_2851	DNA topoisomerase I	2148	up
ORF_2852	tRNA:M(5)U-54 methyltransferase	1326	up
ORF_2870	MarR family transcriptional regulator	438	up
ORF_2871	protease synthase and sporulation negative regulatory protein pai 1	528	up
ORF_2872	ribitolphosphotransferase	1896	up
ORF_2873	ribitolphosphotransferase	1107	up
ORF_2875	2-C-methyl-D-erythritol 4-phosphate cytidylyltransferase	702	up
ORF_2892	acetyltransferase (putative)	435	up
ORF_2893	DegV family protein	870	up
ORF_2917	conserved hypothetical protein	141	up
ORF_2918	ABC transporter, ATP-binding protein	678	up
ORF_2919	transport protein	753	up
ORF_2920	microcin immunity protein	969	up
ORF_2921	lysin	1344	up
ORF_2922	GNAT family acetyltransferase	489	up
ORF_2923	MccC family protein	1080	up
ORF_2926	lipase/esterase (putative)	753	up
ORF_2929	methylase (putative)	342	up
ORF_2931	Holliday junction-specific endonuclease	624	up
ORF_2932	penicillin binding protein 1A	2304	up
ORF_2938	amino acid ABC transporter, substrate binding protein	858	up
ORF_2939	amino acid ABC transporter, permease protein	672	up
ORF_2940	amino acid ABC transporter, ATP-binding protein	1068	up
ORF_2942	asparaginyl-tRNA synthetase	1299	up
ORF_2943	aspartate aminotransferase	1206	up
ORF_2944	conserved hypothetical protein	501	up
ORF_2945	DNA-directed DNA polymerase III epsilon subunit	2805	up
ORF_2946	mevalonate kinase	939	up
ORF_2947	diphosphomevalonate decarboxylase	978	up
ORF_2948	phosphomevalonate kinase	1116	up
ORF_2949	isopentenyl pyrophosphate isomerase	1047	up
ORF_2950	aldose 1-epimerase	1014	up
ORF_2951	maltose phosphorylase	2247	up
ORF_2952	sugar transport protein (putative)	1347	up
ORF_2957	amino acid transport protein	1500	up
ORF_2958	4-aminobutyrate aminotransferase	1350	up
ORF_2963	conserved hypothetical protein	117	up
ORF_2964	diaminopimelate decarboxylase	1326	up
ORF_2965	4-oxalocrotonate tautomerase	195	up
ORF_2971	integral membrane protein	267	up
ORF_2973	integral membrane protein	249	up
ORF_2991	transcription regulator	888	up
ORF_2992	integral membrane protein	726	up
ORF_2993	phosphopantetheinyltransferase	552	up
ORF_2994	enoyl-(acyl carrier protein) reductase	759	up
ORF_2995	acetyl-CoA carboxylase, carboxyl transferase subunit alpha	771	up
ORF_2996	acetyl-CoA carboxylase, carboxyl transferase subunit beta	843	up
ORF_2997	acetyl-CoA carboxylase, biotin carboxylase subunit	1389	up
ORF_2998	(3R)-hydroxymyristoyl-(acyl carrier protein) dehydratase	414	up
ORF_2999	acetyl-CoA carboxylase, biotin carboxyl carrier protein	462	up
ORF_3000	3-oxoacyl-(acyl-carrier protein) synthase II	1233	up
ORF_3001	3-oxoacyl-	723	up
ORF_3002	(acyl-carrier protein) S-malonyltransferase	933	up
ORF_3003	acyl carrier protein	249	up
ORF_3004	3-oxoacyl-(acyl carrier protein) synthase III	987	up
ORF_3005	(3R)-hydroxymyristoyl-[acyl carrier protein] dehydratase	444	up
ORF_3017	phosphoribosylanthranilate isomerase	627	up
ORF_3018	indole-3-glycerol-phosphate synthase	783	up
ORF_3021	anthranilate synthase, component I	1437	up
ORF_3022	conserved hypothetical protein	150	up
ORF_3023	ABC superfamily ATP binding cassette transporter, membrane protein	1596	up
ORF_3029	50S ribosomal protein L19	357	up
ORF_3031	16S rRNA processing protein	525	up
ORF_3032	conserved hypothetical protein	258	up
ORF_3033	30S ribosomal protein S16	273	up
ORF_3042	DAK2 domain protein	1707	up
ORF_3044	ribosomal protein L28	186	up
ORF_3057	conserved hypothetical protein	336	up
ORF_3062	DNA repair protein RecN	1695	up
ORF_3064	hemolysin-like protein	819	up
ORF_3065	geranyltranstransferase	927	up
ORF_3066	exodeoxyribonuclease VII, small subunit	231	up
ORF_3076	transcription regulator	630	up
ORF_3077	conserved hypothetical protein	156	up
ORF_3088	conserved hypothetical protein	177	up
ORF_3090	conserved hypothetical protein	621	up
ORF_3096	integral membrane protein	2646	up
ORF_3097	conserved hypothetical protein	303	up
ORF_3099	integral membrane protein	723	up
ORF_3112	exonuclease SbcC	3186	up
ORF_3113	prenyltransferase	969	up
ORF_3120	muramidase (putative)	2583	up
ORF_3123	glycerol uptake facilitator protein	753	up
ORF_3124	thioredoxin	321	up
ORF_3125	conserved hypothetical protein	270	up
ORF_3132	transposase IS66	282	up
ORF_3133	transport protein	1221	up
ORF_3137	transcription regulator (putative)	567	up
ORF_0001	transporter, major facilitator family protein	1392	down
ORF_0002	conserved hypothetical protein	273	down
ORF_0003	conserved hypothetical protein	231	down
ORF_0004	prophage Lp3 protein 24	207	down
ORF_0006	conserved hypothetical protein	816	down
ORF_0010	cell surface protein precursor	2355	down
ORF_0011	transcription regulator	441	down
ORF_0012	polysaccharide biosynthesis protein	1422	down
ORF_0025	serine-type D-Ala-D-Ala carboxypeptidase	1683	down
ORF_0026	hypothetical protein	174	down
ORF_0027	conserved hypothetical protein	561	down
ORF_0062	hypothetical protein	123	down
ORF_0070	Protein of hypothetical function DUF1706	510	down
ORF_0072	permease	1836	down
ORF_0076	conserved hypothetical protein	126	down
ORF_0077	signal peptidase I	588	down
ORF_0078	extracellular protein	1539	down
ORF_0079	cell surface protein precursor	342	down
ORF_0080	cell surface protein precursor	1026	down
ORF_0081	extracellular protein	738	down
ORF_0091	conserved hypothetical protein	201	down
ORF_0105	conserved hypothetical protein	210	down
ORF_0106	1,4-alpha-glucan branching enzyme	1905	down
ORF_0107	glucose-1-phosphate adenylyltransferase	1140	down
ORF_0108	glucose-1-phosphate adenylyltransferase, subunit	1173	down
ORF_0112	HAD superfamily hydrolase	768	down
ORF_0124	SPOUT methyltransferase superfamily protein	480	down
ORF_0130	fibronectin-binding protein	648	down
ORF_0132	cation transport protein	1416	down
ORF_0136	short-chain dehydrogenase/oxidoreductase	861	down
ORF_0137	acetoacetate decarboxylase (putative)	846	down
ORF_0138	nitroreductase	654	down
ORF_0156	ArsR family transcriptional regulator	324	down
ORF_0158	conserved hypothetical protein	156	down
ORF_0167	conserved hypothetical protein	279	down
ORF_0168	extracellular protein	573	down
ORF_0169	extracellular protein	693	down
ORF_0170	cell surface protein precursor	1014	down
ORF_0171	extracellular protein	2151	down
ORF_0181	negative regulator of proteolysis	405	down
ORF_0187	small heat shock protein	444	down
ORF_0188	conserved hypothetical protein	339	down
ORF_0189	conserved hypothetical protein	144	down
ORF_0191	acetyltransferase	459	down
ORF_0193	integral membrane protein	699	down
ORF_0194	integral membrane protein	678	down
ORF_0203	conserved hypothetical protein	294	down
ORF_0204	conserved hypothetical protein	387	down
ORF_0209	exopolysaccharide biosynthesis protein	771	down
ORF_0210	integral membrane protein	507	down
ORF_0219	conserved hypothetical protein	129	down
ORF_0236	conserved hypothetical protein	843	down
ORF_0237	conserved hypothetical protein	336	down
ORF_0241	putative frv operon regulatory protein	1113	down
ORF_0249	transcription regulator	732	down
ORF_0250	acetylesterase	792	down
ORF_0251	integral membrane protein (putative)	372	down
ORF_0254	conserved hypothetical protein	852	down
ORF_0255	short-chain dehydrogenase/oxidoreductase	840	down
ORF_0256	shikimate 5-dehydrogenase	885	down
ORF_0257	shikimate 5-dehydrogenase	885	down
ORF_0258	major facilitator superfamily permease	1242	down
ORF_0264	FMN-binding protein	369	down
ORF_0280	alpha-L-rhamnosidase (putative)	1578	down
ORF_0281	sugar transport protein	1281	down
ORF_0282	RhaB1	1953	down
ORF_0289	ferrichrome ABC transporter, substrate binding lipo protein	930	down
ORF_0295	short-chain dehydrogenase/oxidoreductase	747	down
ORF_0296	conserved hypothetical protein	456	down
ORF_0300	cell surface protein precursor	1062	down
ORF_0301	extracellular protein	546	down
ORF_0302	cell surface protein (putative)	2253	down
ORF_0303	hypothetical protein	114	down
ORF_0312	GY family cell surface protein	3570	down
ORF_0314	conserved hypothetical protein	219	down
ORF_0386	conserved hypothetical protein	273	down
ORF_0389	transcription regulator	672	down
ORF_0390	conserved hypothetical protein	123	down
ORF_0391	teichoic acid glycosylation protein (putative)	351	down
ORF_0393	conserved hypothetical protein	219	down
ORF_0394	branched-chain amino acid ABC transporter, substrate binding protein	1194	down
ORF_0400	extracellular protein	783	down
ORF_0401	cell surface protein precursor	1044	down
ORF_0402	cell surface protein precursor (putative)	378	down
ORF_0403	extracellular protein	1509	down
ORF_0412	transcription regulator (putative)	303	down
ORF_0418	conserved hypothetical protein	1410	down
ORF_0420	esterase (putative)	741	down
ORF_0421	conserved hypothetical protein	258	down
ORF_0422	hydrolase	150	down
ORF_0425	3-octaprenyl-4-hydroxybenzoate carboxy-lyase	1473	down
ORF_0428	melibiose operon regulatory protein	162	down
ORF_0429	cell surface protein precursor	1260	down
ORF_0430	conserved hypothetical protein	195	down
ORF_0431	transcription regulator	1005	down
ORF_0439	PTS, EIIA	534	down
ORF_0440	conserved hypothetical protein	243	down
ORF_0443	lipase/esterase (putative)	831	down
ORF_0449	integral membrane protein	1926	down
ORF_0450	HAD superfamily hydrolase	795	down
ORF_0454	acetyltransferase (putative)	528	down
ORF_0455	acetyltransferase (putative)	546	down
ORF_0464	oxidoreductase	1029	down
ORF_0465	conserved hypothetical protein	867	down
ORF_0466	possible cystathionine beta-lyase	1191	down
ORF_0467	conserved hypothetical protein	594	down
ORF_0472	conserved hypothetical protein	444	down
ORF_0473	conserved hypothetical protein	222	down
ORF_0476	oxidoreductase (putative)	597	down
ORF_0482	GNAT family acetyltransferase	498	down
ORF_0487	DNA-(apurinic or apyrimidinic site) lyase	651	down
ORF_0491	succinyl-diaminopimelate desuccinylase	1263	down
ORF_0493	conserved hypothetical protein	399	down
ORF_0494	carboxymuconolactone decarboxylase	321	down
ORF_0495	short-chain dehydrogenase/oxidoreductase	744	down
ORF_0506	transcription regulator (putative)	363	down
ORF_0508	extracellular protein (putative)	825	down
ORF_0510	cell surface protein precursor	372	down
ORF_0511	extracellular protein	609	down
ORF_0512	cell surface protein precursor	1044	down
ORF_0516	extracellular protein	705	down
ORF_0517	cell surface protein precursor	1065	down
ORF_0518	cell surface protein precursor	426	down
ORF_0520	sensor histidine protein kinase	1329	down
ORF_0522	4-hydroxybenzoyl-CoA thioesterase domain protein	135	down
ORF_0531	amino acid transport protein	1485	down
ORF_0532	conserved hypothetical protein	822	down
ORF_0533	conserved hypothetical protein	426	down
ORF_0535	short chain dehydrogenase/reductase family oxidoreductase	891	down
ORF_0550	transcription regulator	912	down
ORF_0562	dehydrogenase	1059	down
ORF_0566	cellobiose PTS, EIIA	447	down
ORF_0569	conserved hypothetical protein	315	down
ORF_0571	integral membrane protein	363	down
ORF_0572	cell surface protein precursor (putative)	3225	down
ORF_0581	GPH family glycoside-pentoside-hexuronide:cation symporter	1401	down
ORF_0582	lipase/esterase	1017	down
ORF_0589	integral membrane protein	765	down
ORF_0590	transcription regulator	327	down
ORF_0604	transcription regulator	291	down
ORF_0605	conserved hypothetical protein	708	down
ORF_0606	conserved hypothetical protein	495	down
ORF_0607	conserved hypothetical protein	123	down
ORF_0609	conserved hypothetical protein	531	down
ORF_0613	hypothetical protein	132	down
ORF_0614	conserved hypothetical protein	573	down
ORF_0615	conserved hypothetical protein	333	down
ORF_0616	lipoprotein	1011	down
ORF_0617	fumarylacetoacetate hydrolase	801	down
ORF_0618	hypothetical protein	117	down
ORF_0619	alkaline shock protein	441	down
ORF_0620	alkaline shock protein	423	down
ORF_0621	conserved hypothetical protein	183	down
ORF_0622	conserved hypothetical protein	546	down
ORF_0623	integral membrane protein	255	down
ORF_0625	conserved hypothetical protein	384	down
ORF_0626	cell surface protein	2505	down
ORF_0627	MFS family major facilitator transporter	1110	down
ORF_0628	transcriptional regulator	345	down
ORF_0630	transcription regulator	369	down
ORF_0631	integral membrane protein	369	down
ORF_0632	hypothetical protein	117	down
ORF_0633	conserved hypothetical protein	1404	down
ORF_0634	possible transposase	180	down
ORF_0637	transposase	300	down
ORF_0638	conserved hypothetical protein	204	down
ORF_0644	enoyl-	930	down
ORF_0651	GroEL supressor protein SugE	315	down
ORF_0652	MutT/nudix family protein	438	down
ORF_0671	conserved hypothetical protein	252	down
ORF_0675	conserved hypothetical protein	819	down
ORF_0676	extracellular protein	510	down
ORF_0677	metal uptake regulator	444	down
ORF_0682	conserved hypothetical protein	474	down
ORF_0690	putative pyruvate oxidase	1761	down
ORF_0693	transport protein	1308	down
ORF_0695	transcription regulator	486	down
ORF_0703	negative regulator of proteolysis	423	down
ORF_0719	conserved hypothetical protein	1275	down
ORF_0721	conserved hypothetical protein	792	down
ORF_0722	conserved hypothetical protein	432	down
ORF_0723	glycerol uptake facilitator protein	717	down
ORF_0726	hydroxyethylthiazole kinase	792	down
ORF_0727	phosphomethylpyrimidine kinase	825	down
ORF_0728	thiamine-phosphate diphosphorylase	654	down
ORF_0729	purine-cytosine transport protein	1200	down
ORF_0730	conserved hypothetical protein	741	down
ORF_0738	stress-responsive transcription regulator (putative)	195	down
ORF_0740	transcription regulator (putative)	474	down
ORF_0741	small heat shock protein	423	down
ORF_0742	integral membrane protein	171	down
ORF_0748	oxidoreductase	849	down
ORF_0749	oxidoreductase	873	down
ORF_0752	extracellular protein	813	down
ORF_0787	integral membrane protein	273	down
ORF_0801	2,5-diketo-D-gluconate reductase	861	down
ORF_0810	extracellular protein	3408	down
ORF_0811	cell surface protein precursor	1035	down
ORF_0812	extracellular protein	810	down
ORF_0817	conserved hypothetical protein	198	down
ORF_0820	conserved hypothetical protein	336	down
ORF_0840	PTS family N-acetylglucosamine porter, IIABC component	1989	down
ORF_0841	conserved hypothetical protein	342	down
ORF_0847	conserved hypothetical protein	222	down
ORF_0855	conserved hypothetical protein	318	down
ORF_0856	integral membrane protein	561	down
ORF_0865	conserved hypothetical protein	192	down
ORF_0866	ABC transporter, ATP-binding and permease protein	399	down
ORF_0867	ABC transporter, ATP-binding and permease protein	1605	down
ORF_0868	poly(glycerol-phosphate) alpha-glucosyltransferase	1578	down
ORF_0869	ABC transporter, ATP-binding and permease protein	1764	down
ORF_0870	conserved hypothetical protein	132	down
ORF_0871	conserved hypothetical protein	144	down
ORF_0872	hypothetical protein	168	down
ORF_0873	conserved hypothetical protein	510	down
ORF_0874	mobilization protein	1086	down
ORF_0875	replication protein 141	711	down
ORF_0879	glutathione reductase	1332	down
ORF_0920	D-alanyl-D-alanine dipeptidase	558	down
ORF_0921	multidrug transport protein	1197	down
ORF_0947	cell surface protein	7947	down
ORF_0954	ATP/GTP hydrolase	462	down
ORF_0955	acetyltransferase (putative)	516	down
ORF_0958	oxidoreductase (putative)	903	down
ORF_0962	integral membrane protein	666	down
ORF_0971	aldose 1-epimerase	1020	down
ORF_0989	adenine-specific methyltransferase	1095	down
ORF_0990	conserved hypothetical protein	165	down
ORF_0991	conserved hypothetical protein	489	down
ORF_0992	sensory box protein/response regulator	186	down
ORF_0993	conserved hypothetical protein	471	down
ORF_0994	ComG operon protein 3 precursor	357	down
ORF_0995	ComG operon protein 2	969	down
ORF_0996	ComG operon protein 1	975	down
ORF_0997	ribokinase	921	down
ORF_1007	mechanosensitive transport protein	894	down
ORF_1008	amino acid amidohydrolase	1155	down
[truncated: 444 more rows]

[truncated: 1 more sheets: FS60h_PC60h]
